# Supplementary material for: The genetic basis of tail-loss evolution in humans and apes
Source: bioRxiv or medRxiv preprint supplement (doi:10.1101/2021.09.14.460388), 2021-09-16

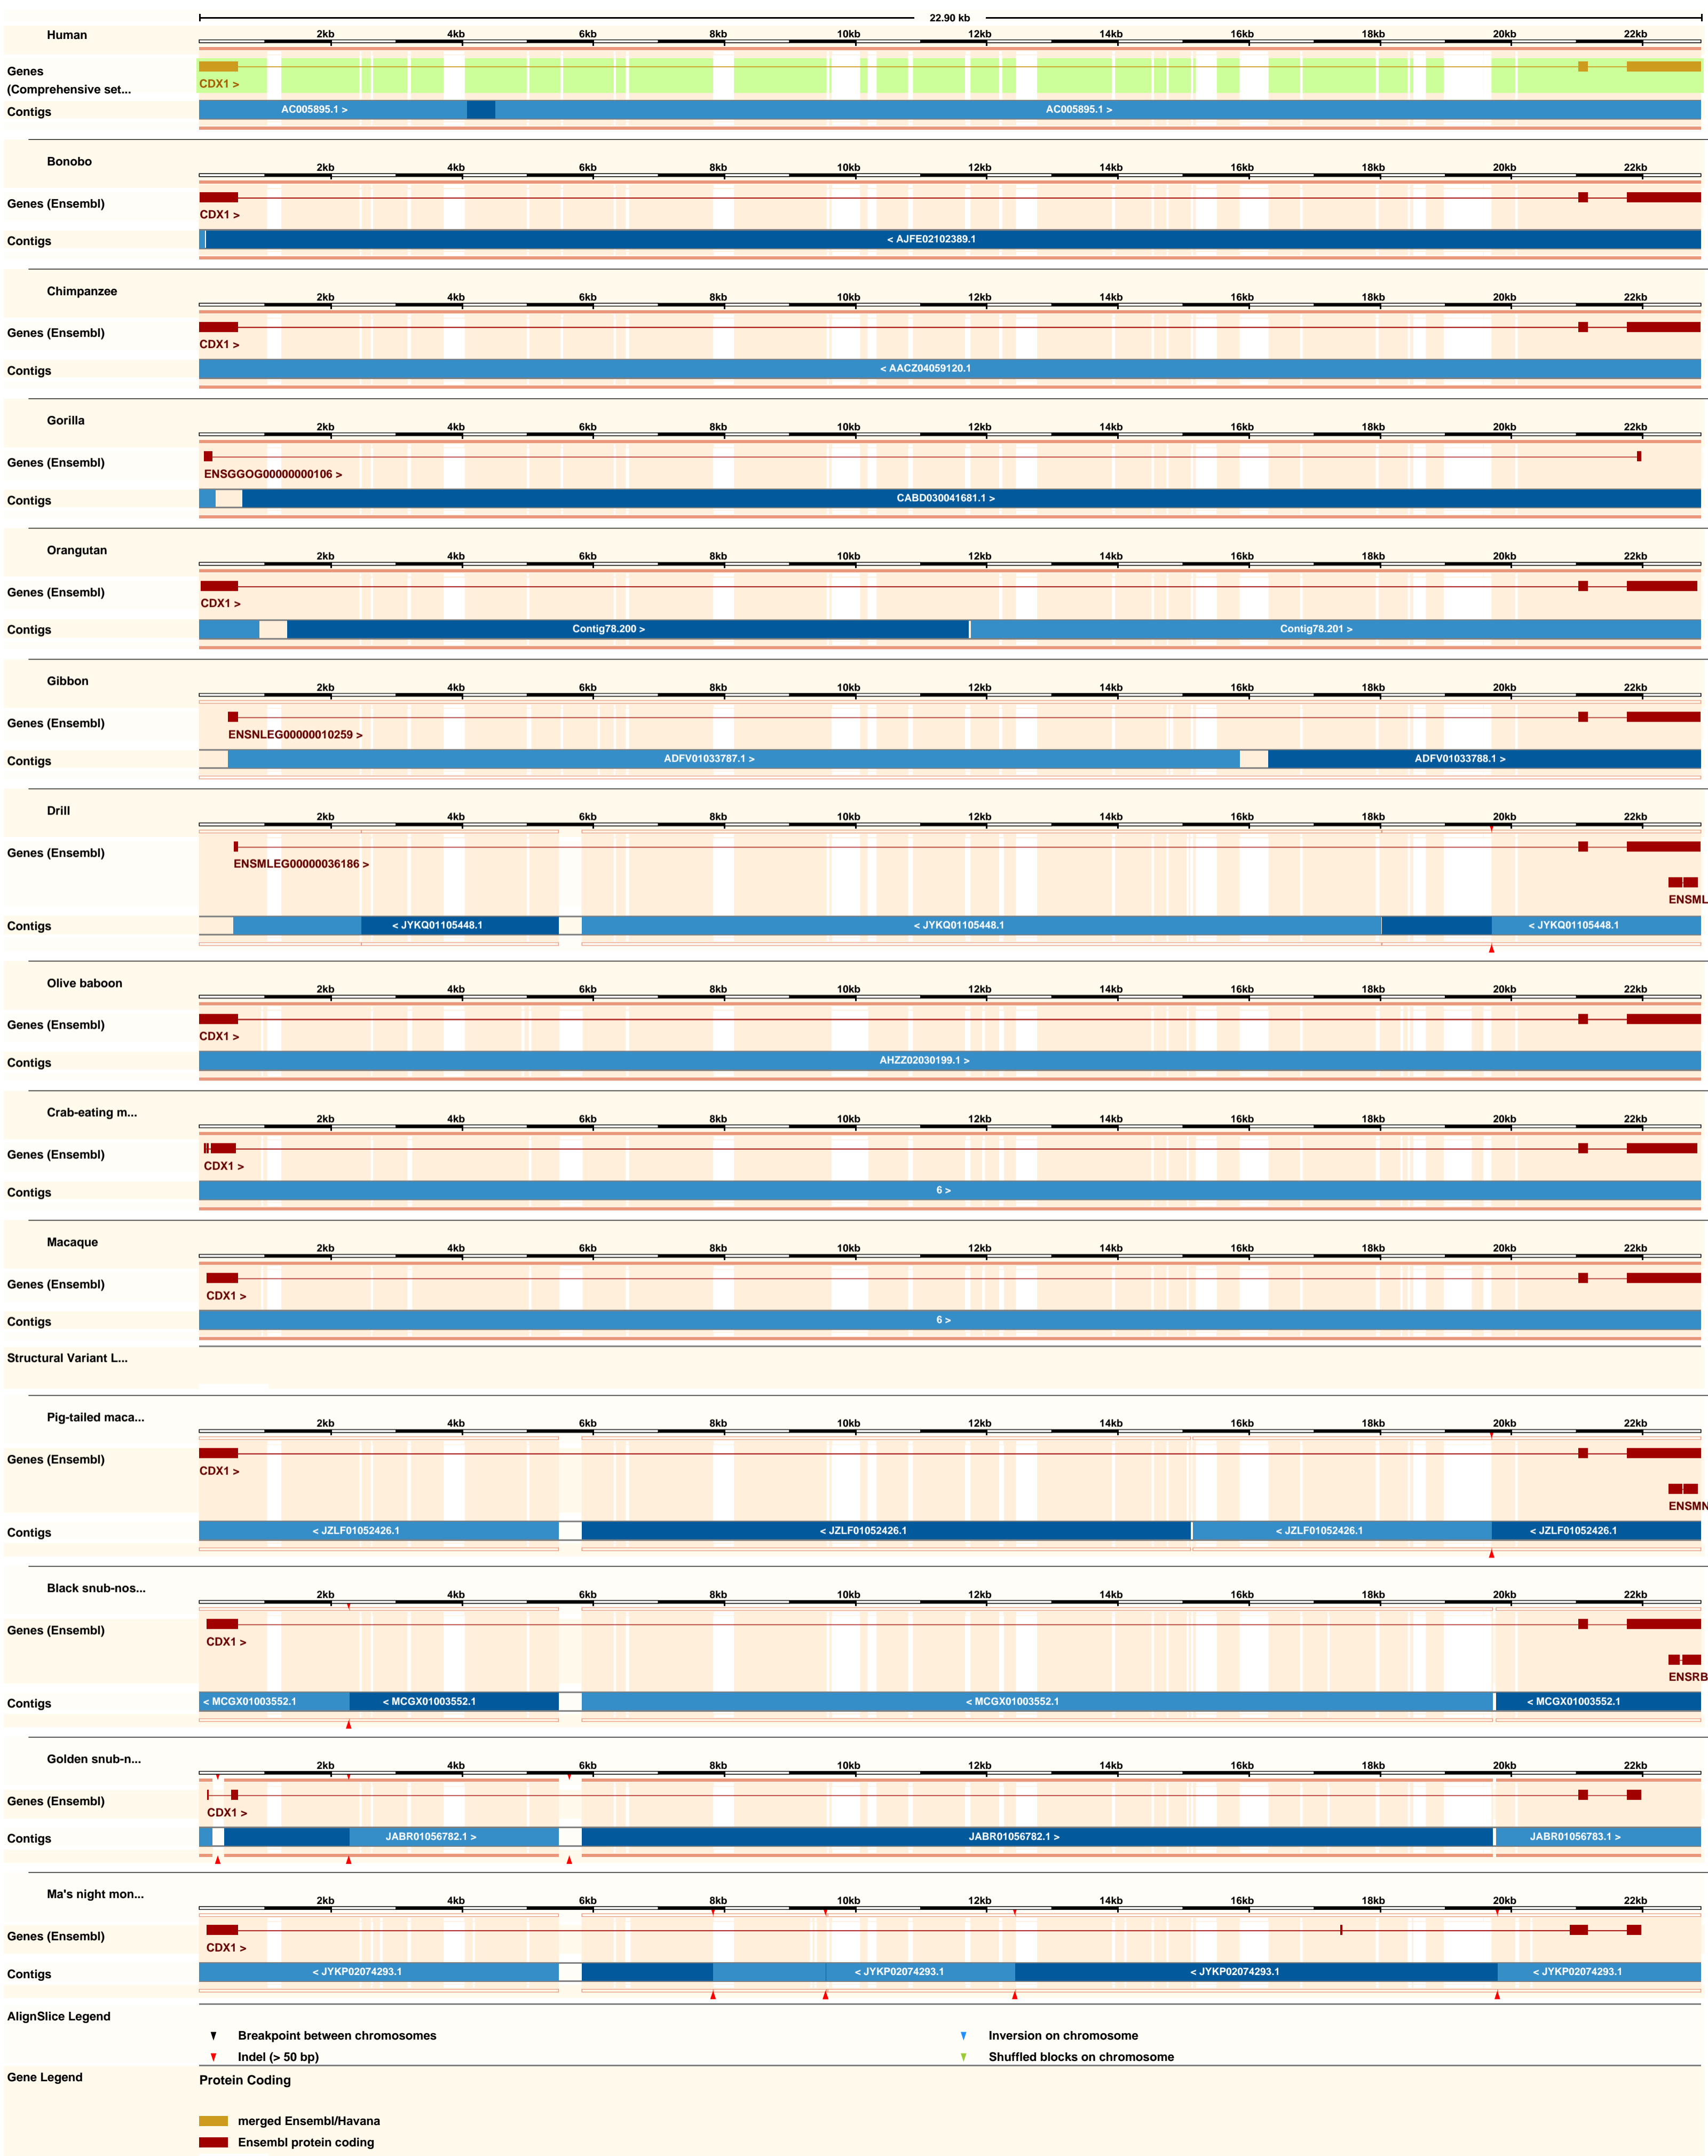

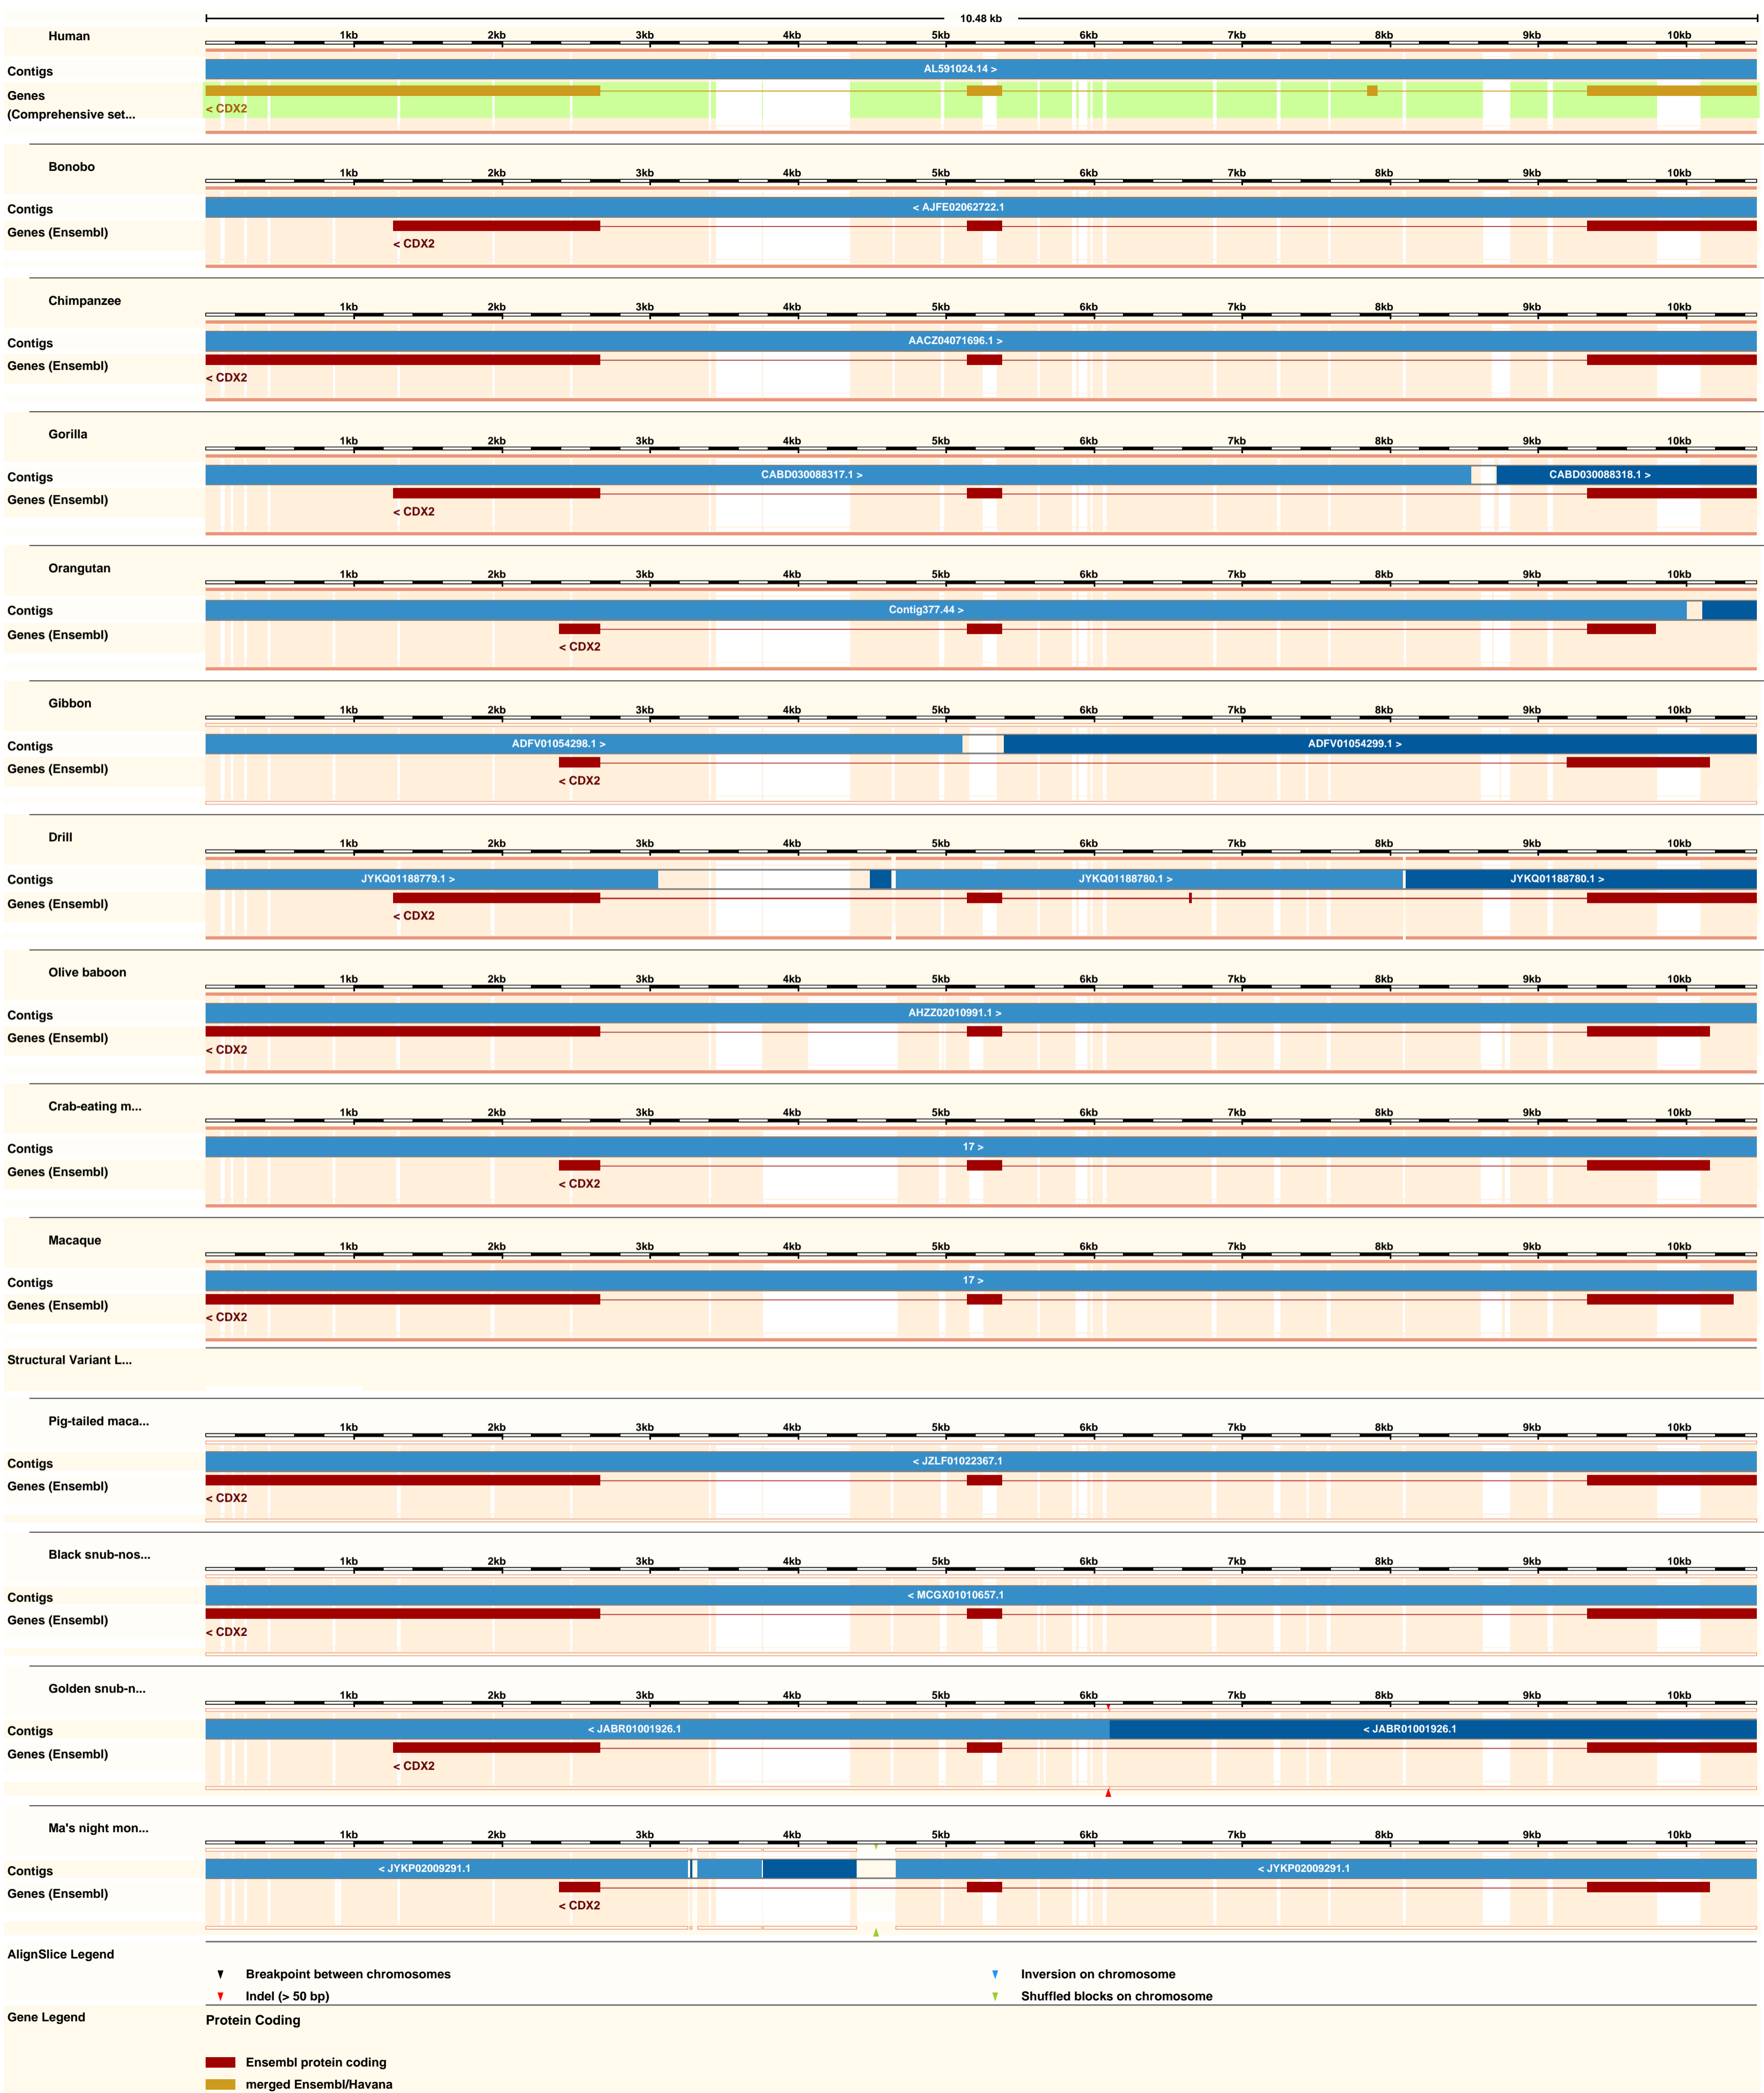

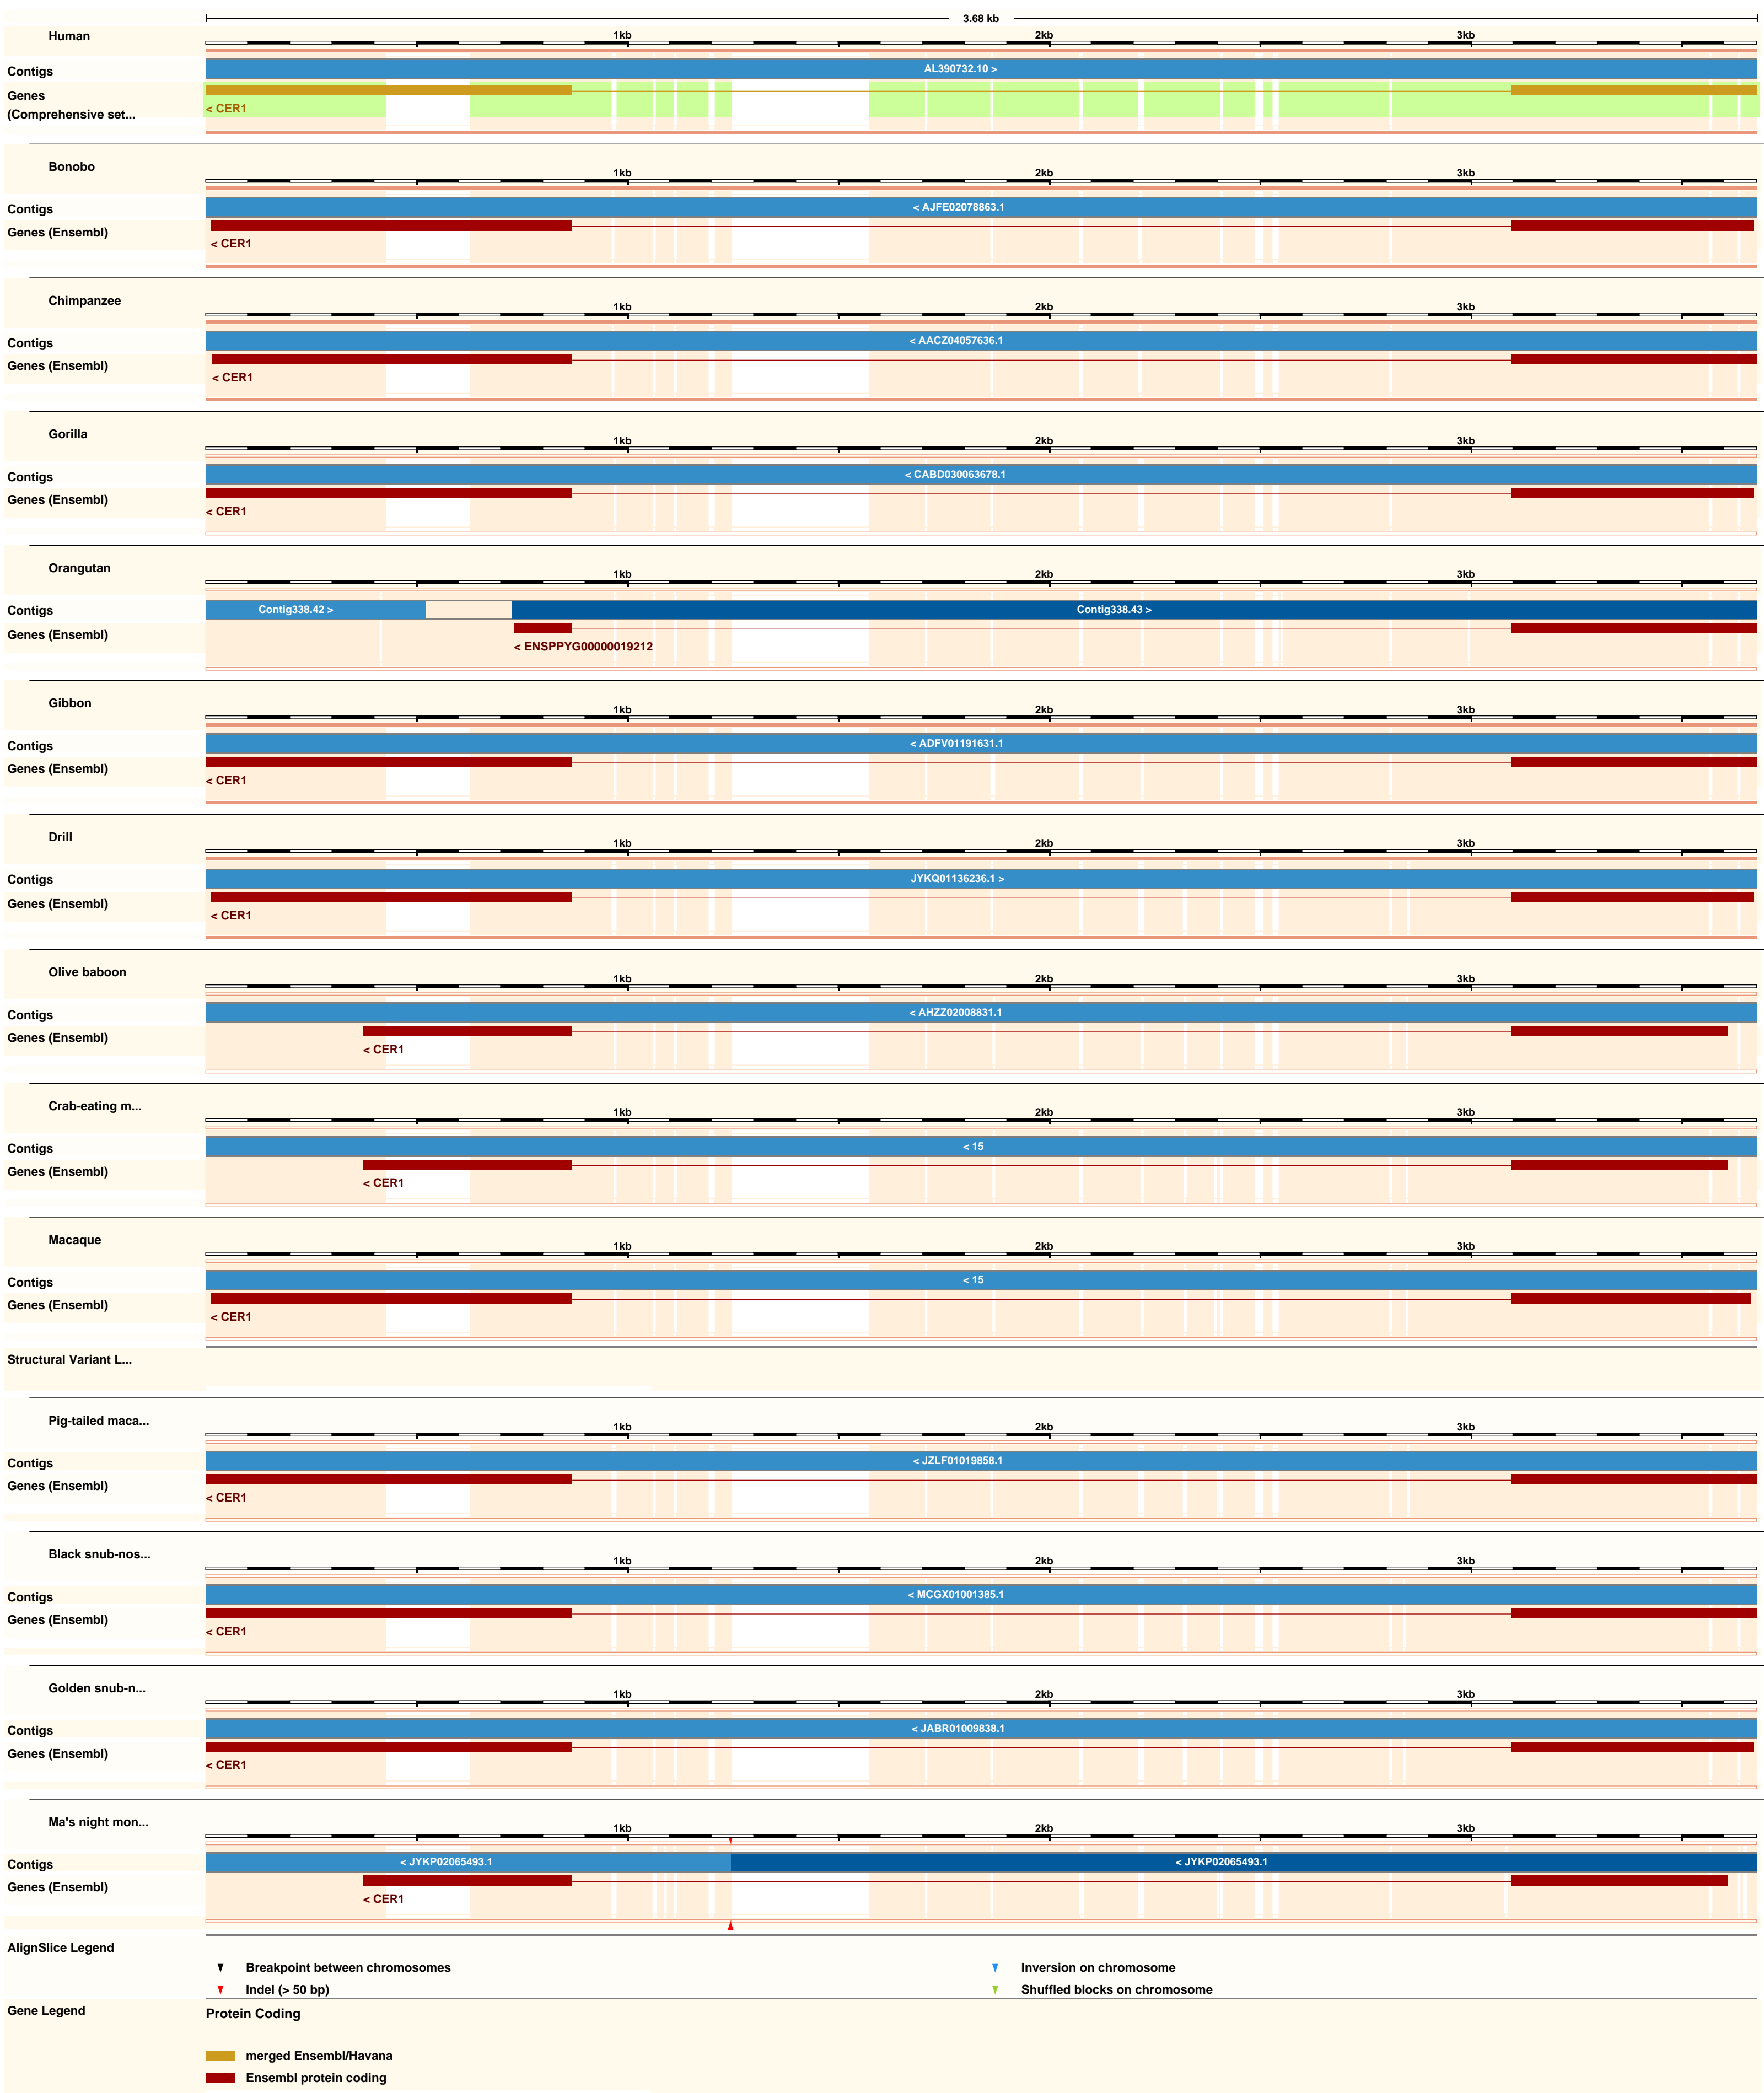

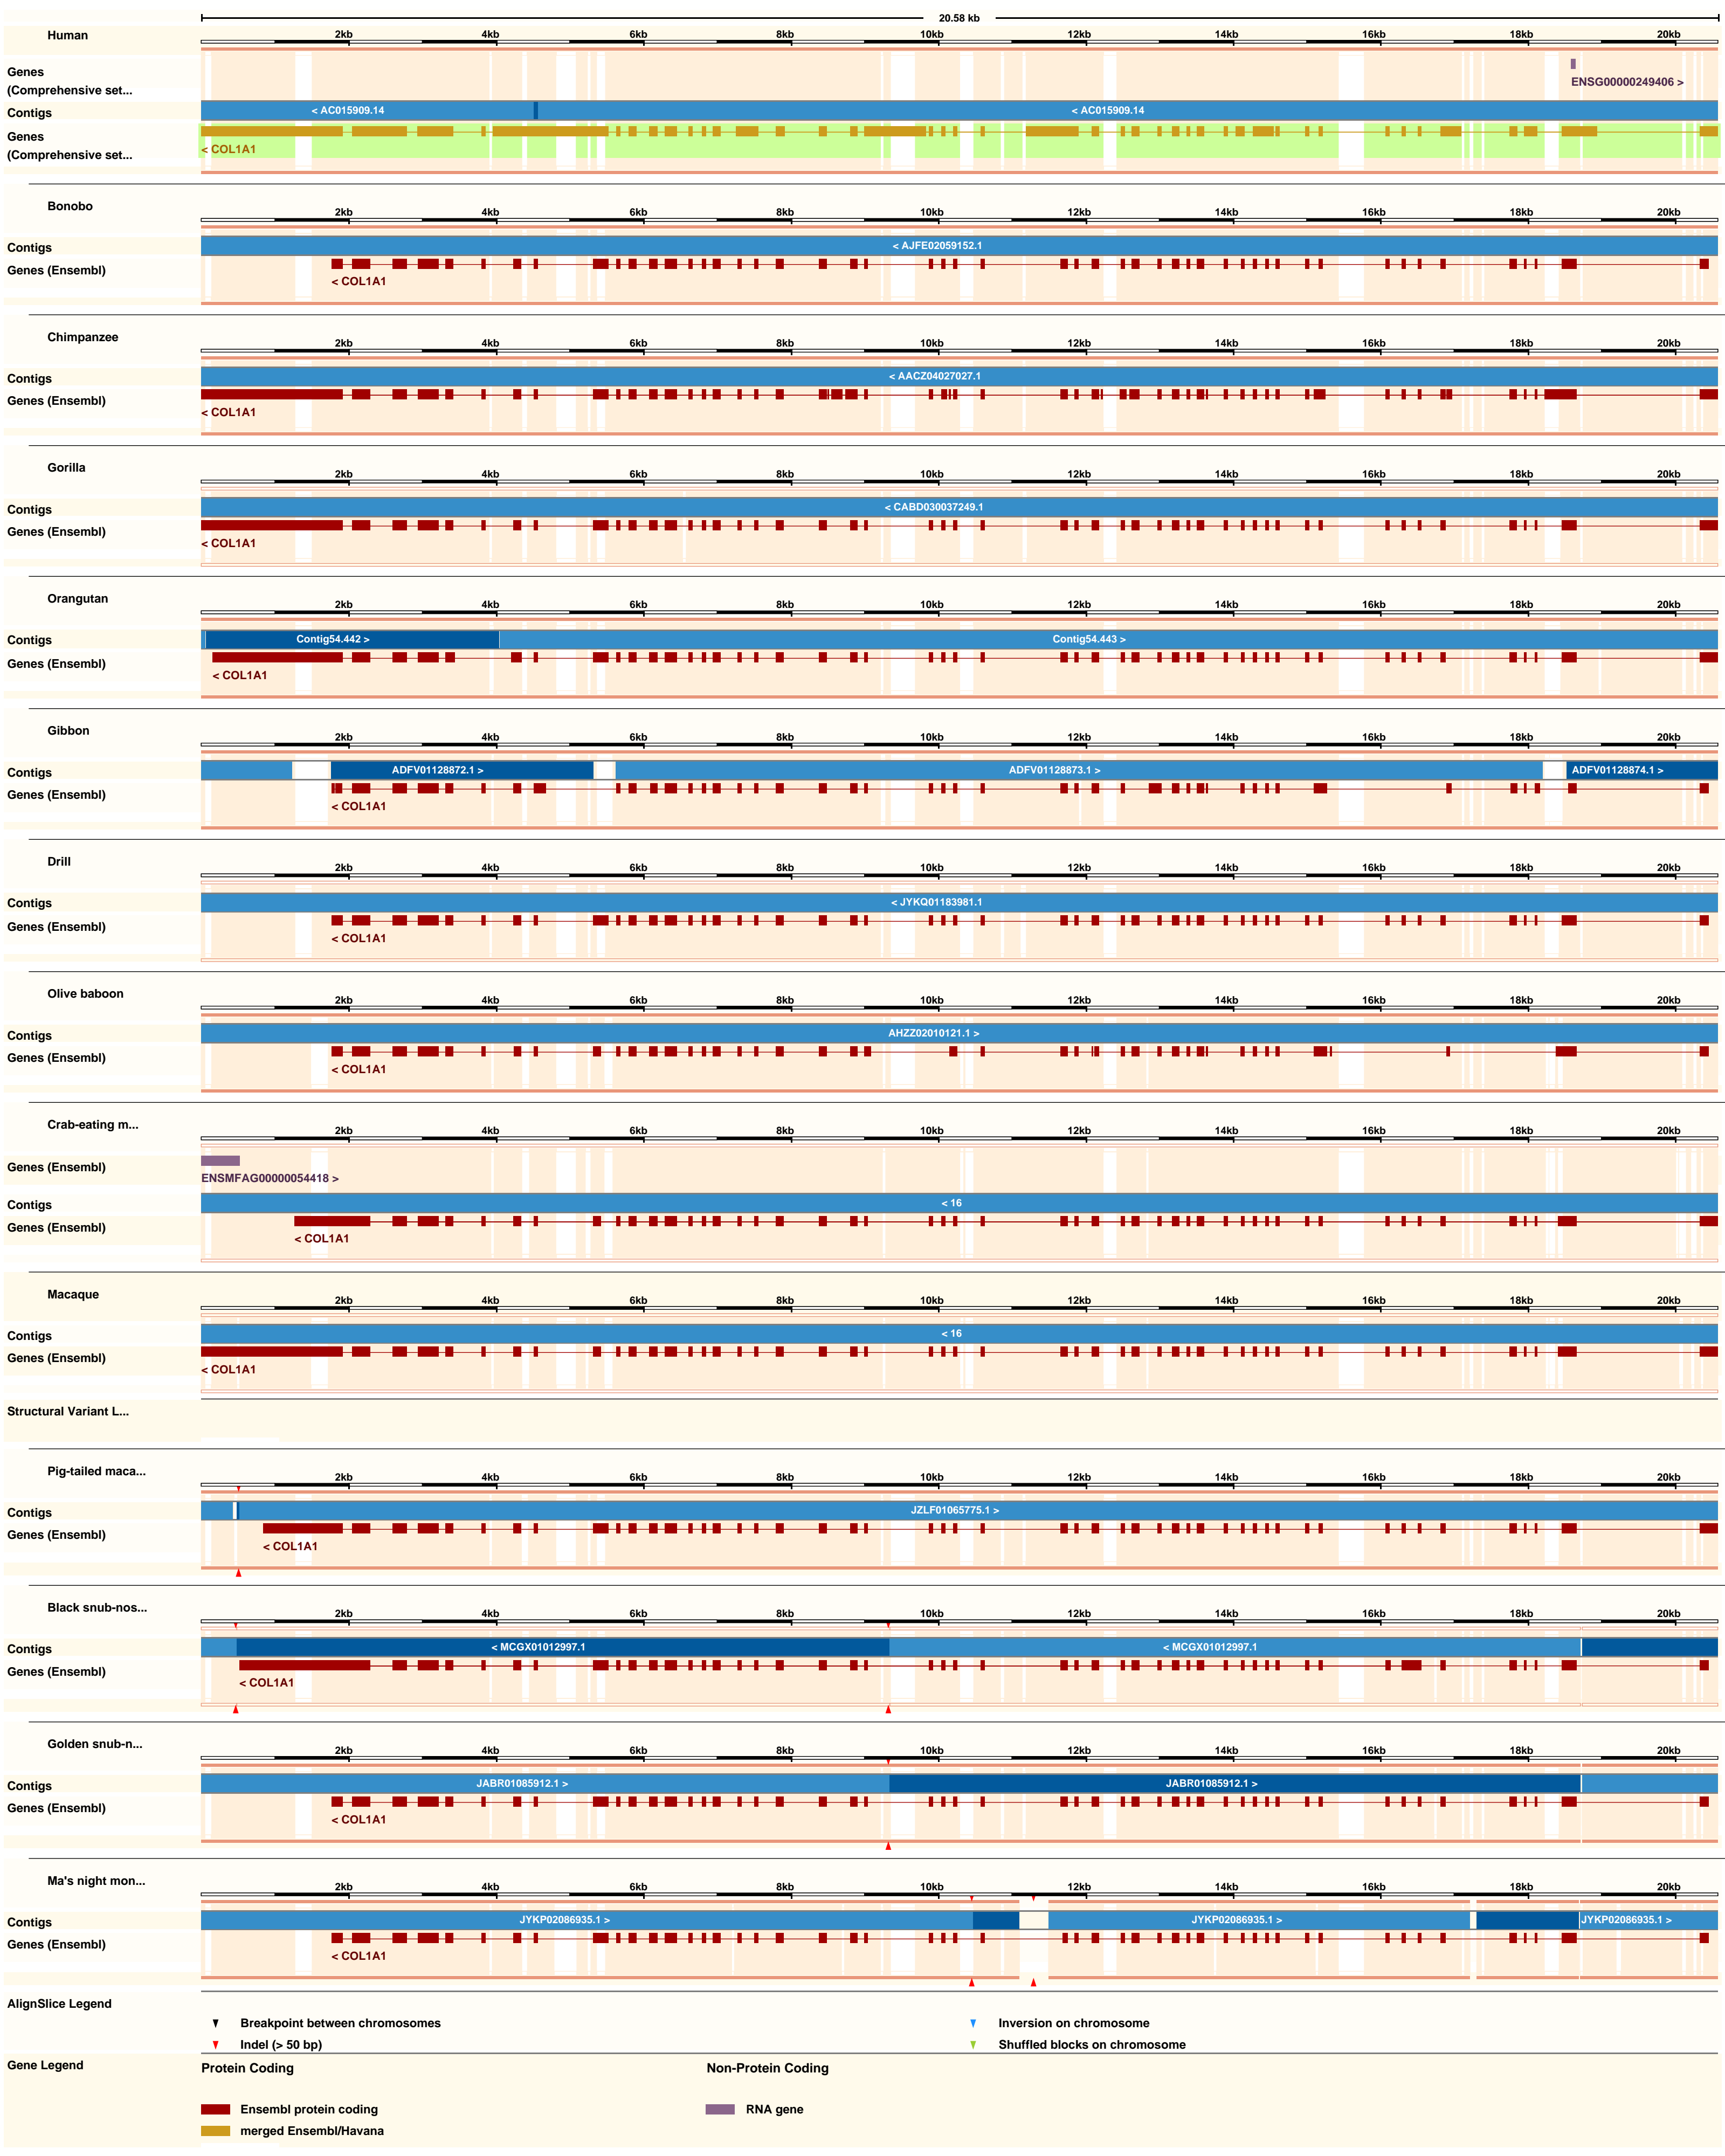

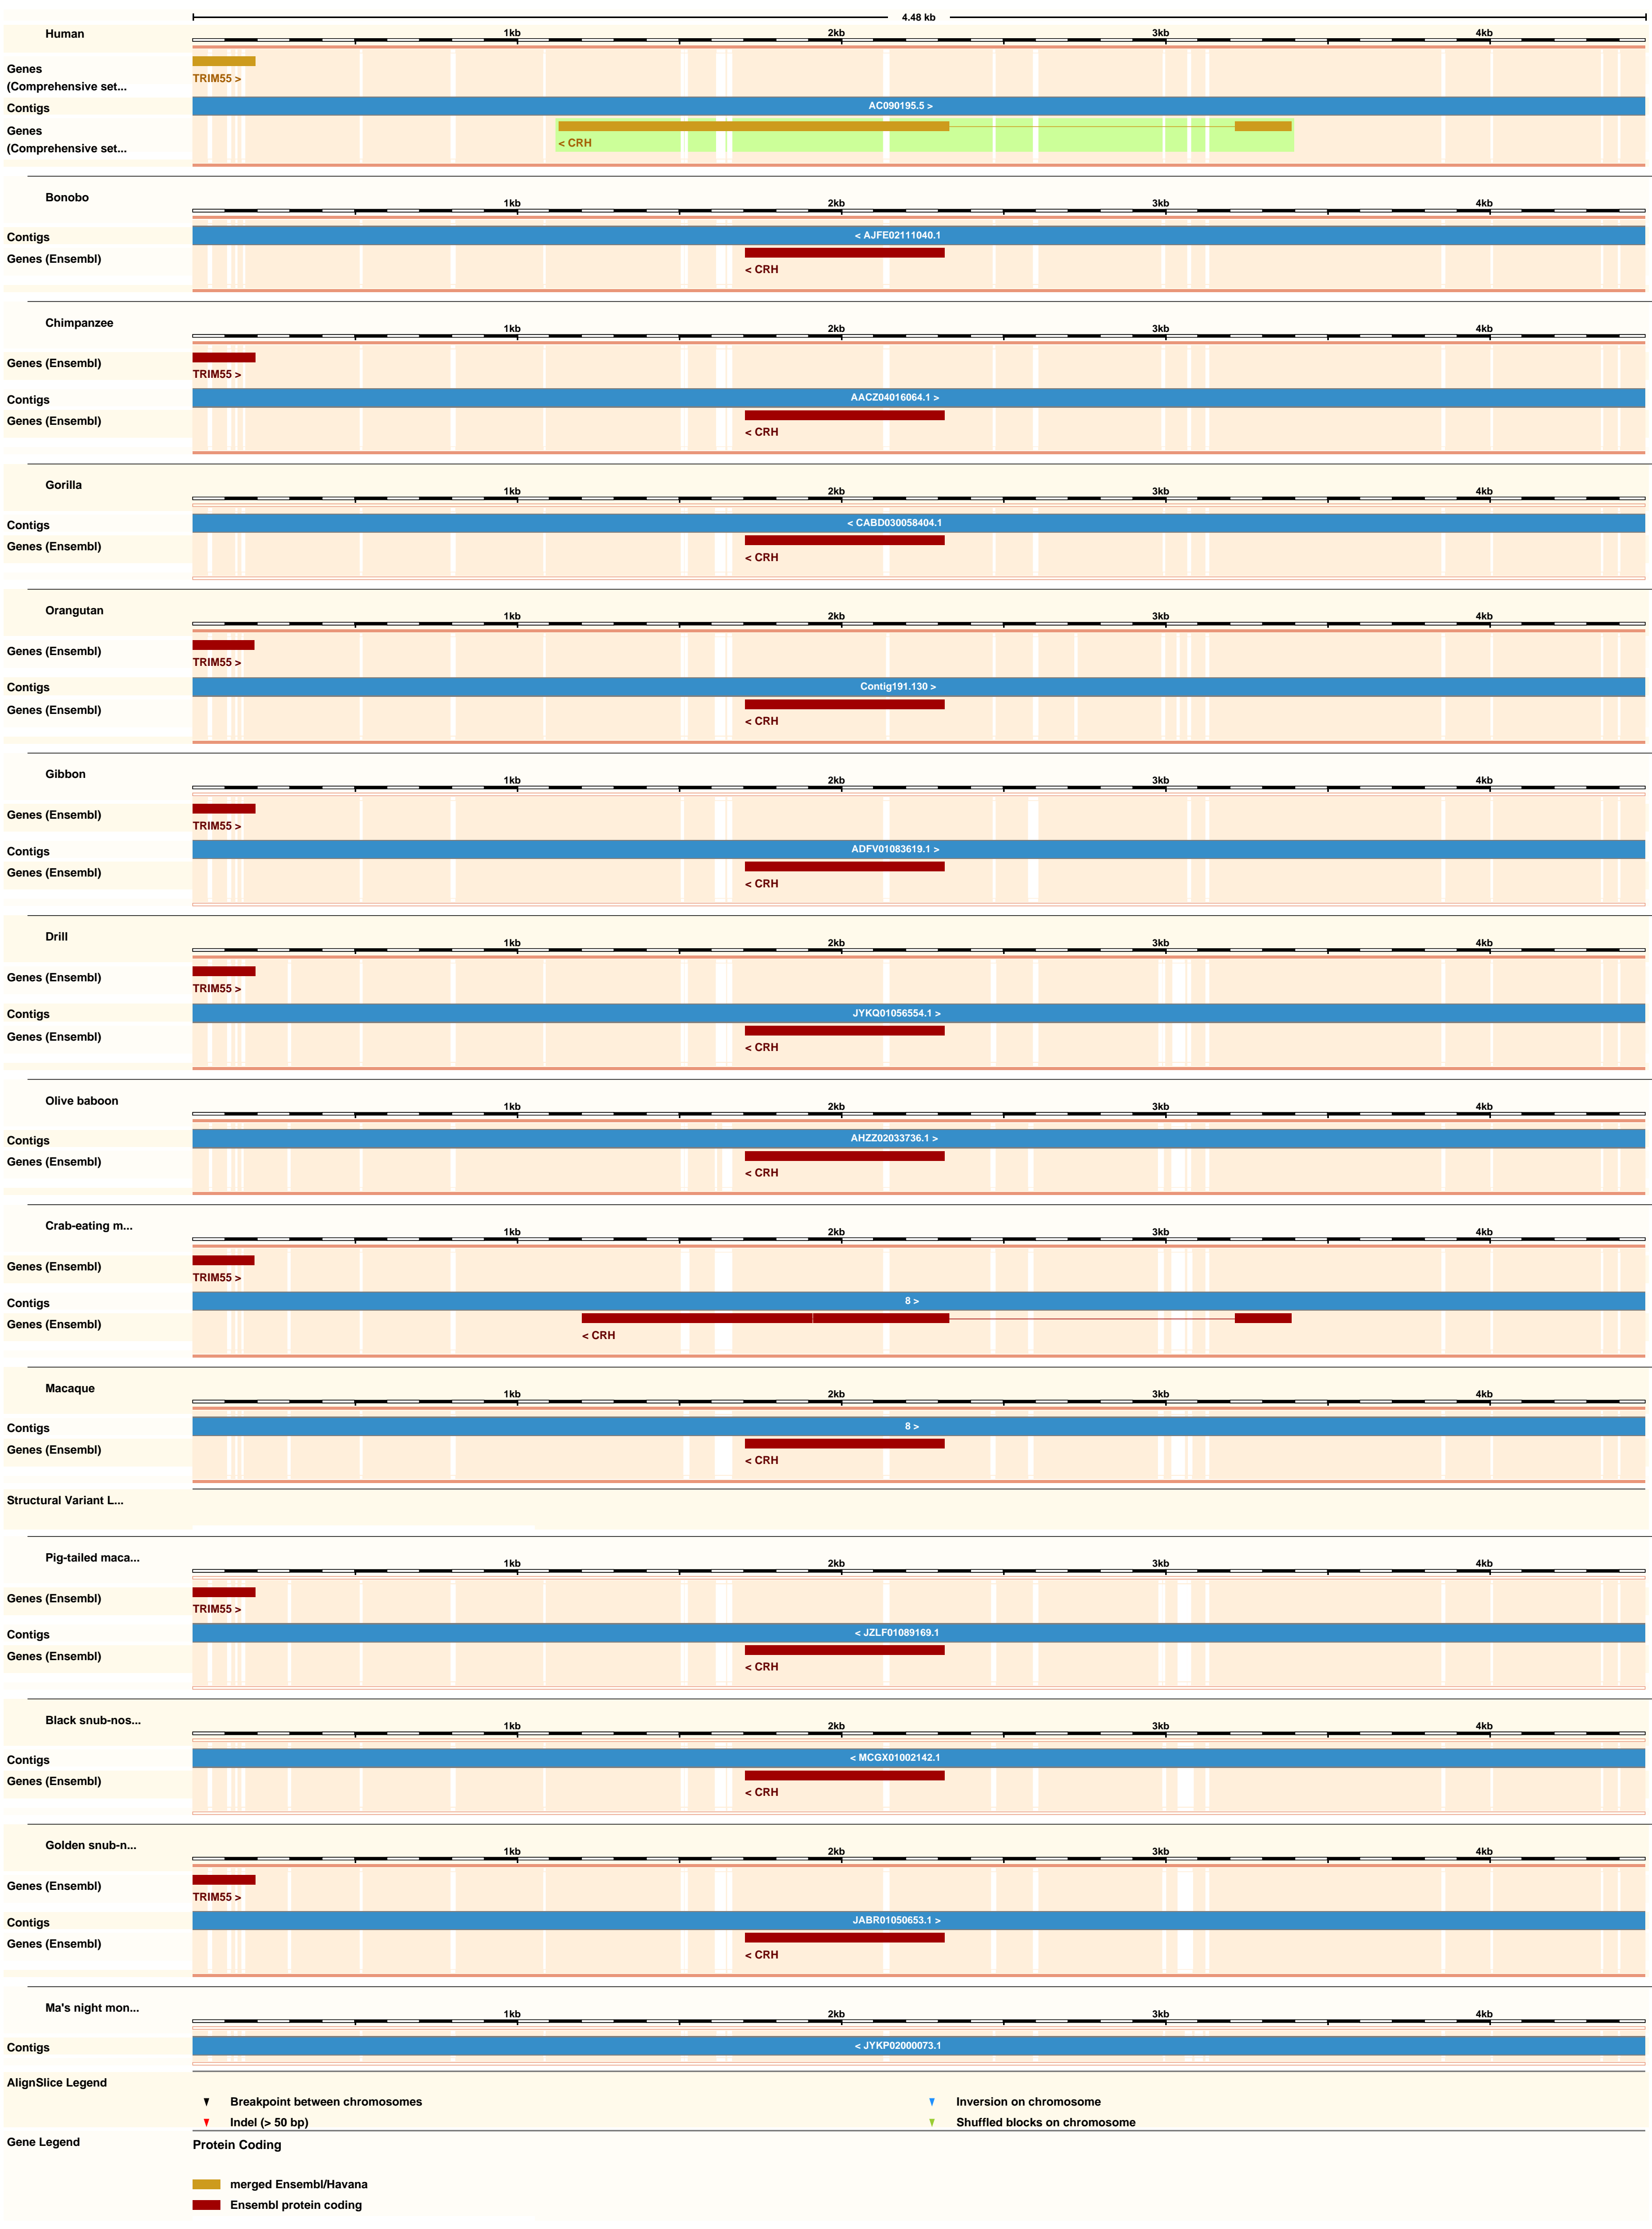

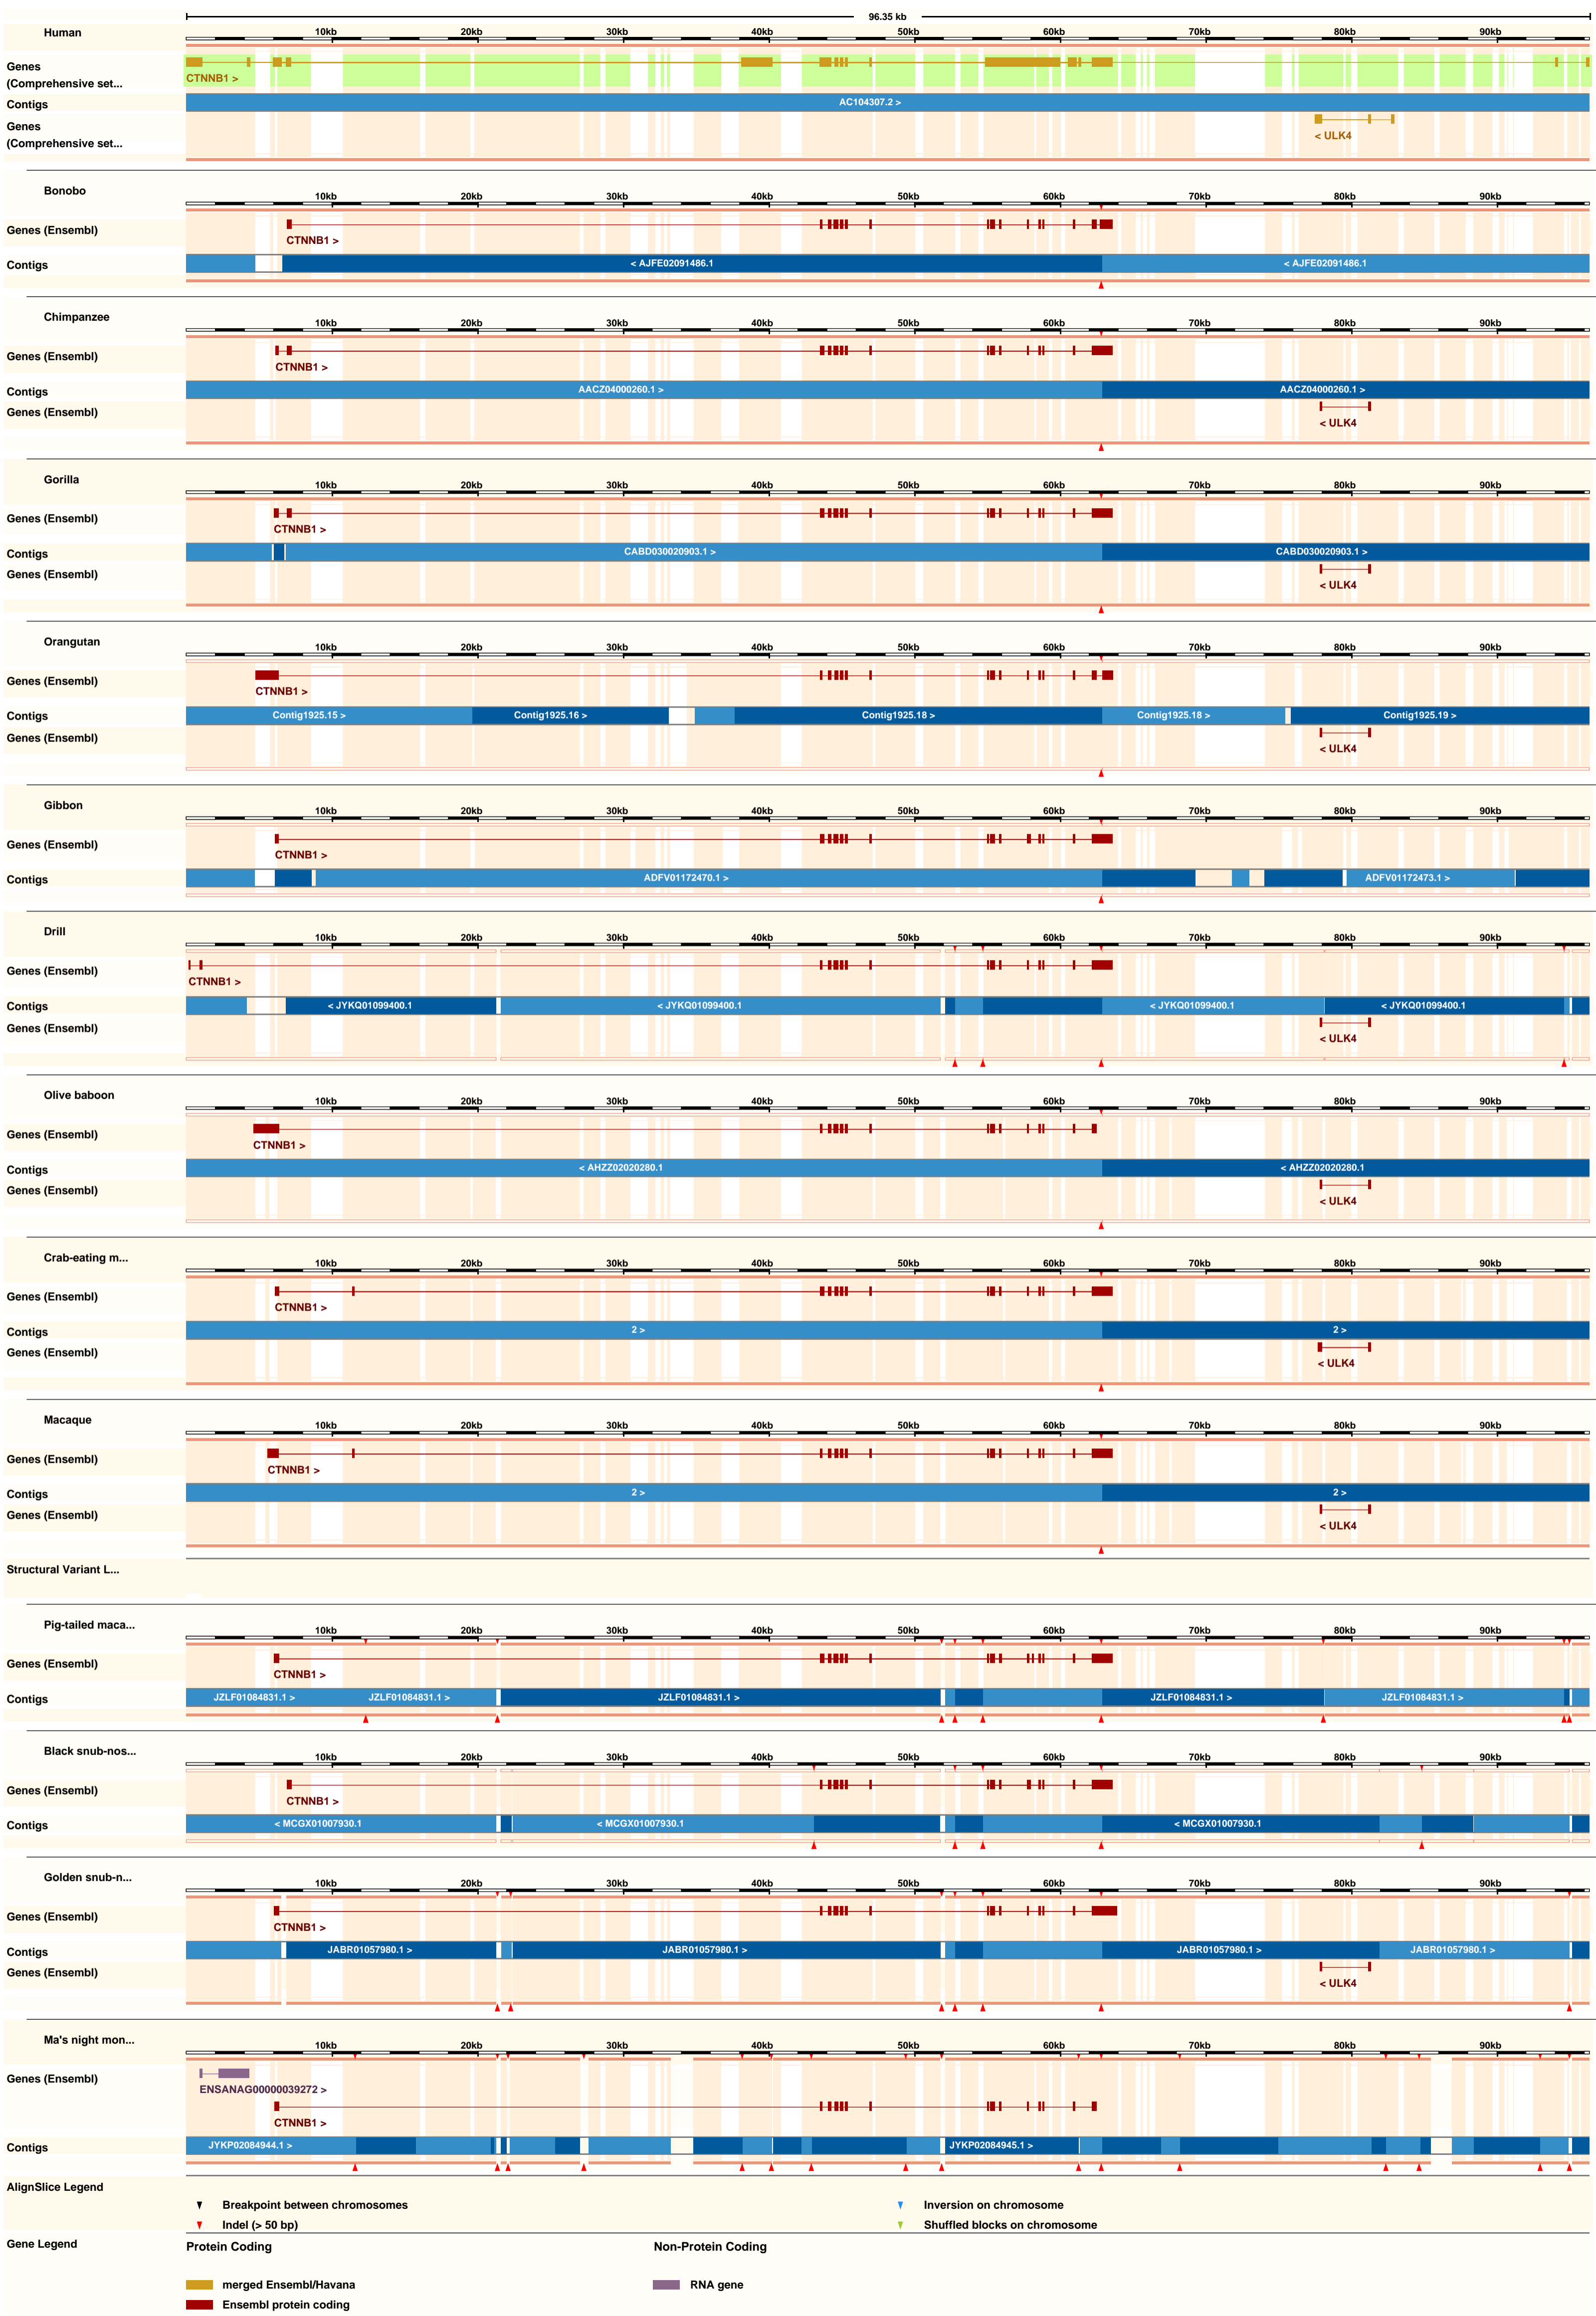

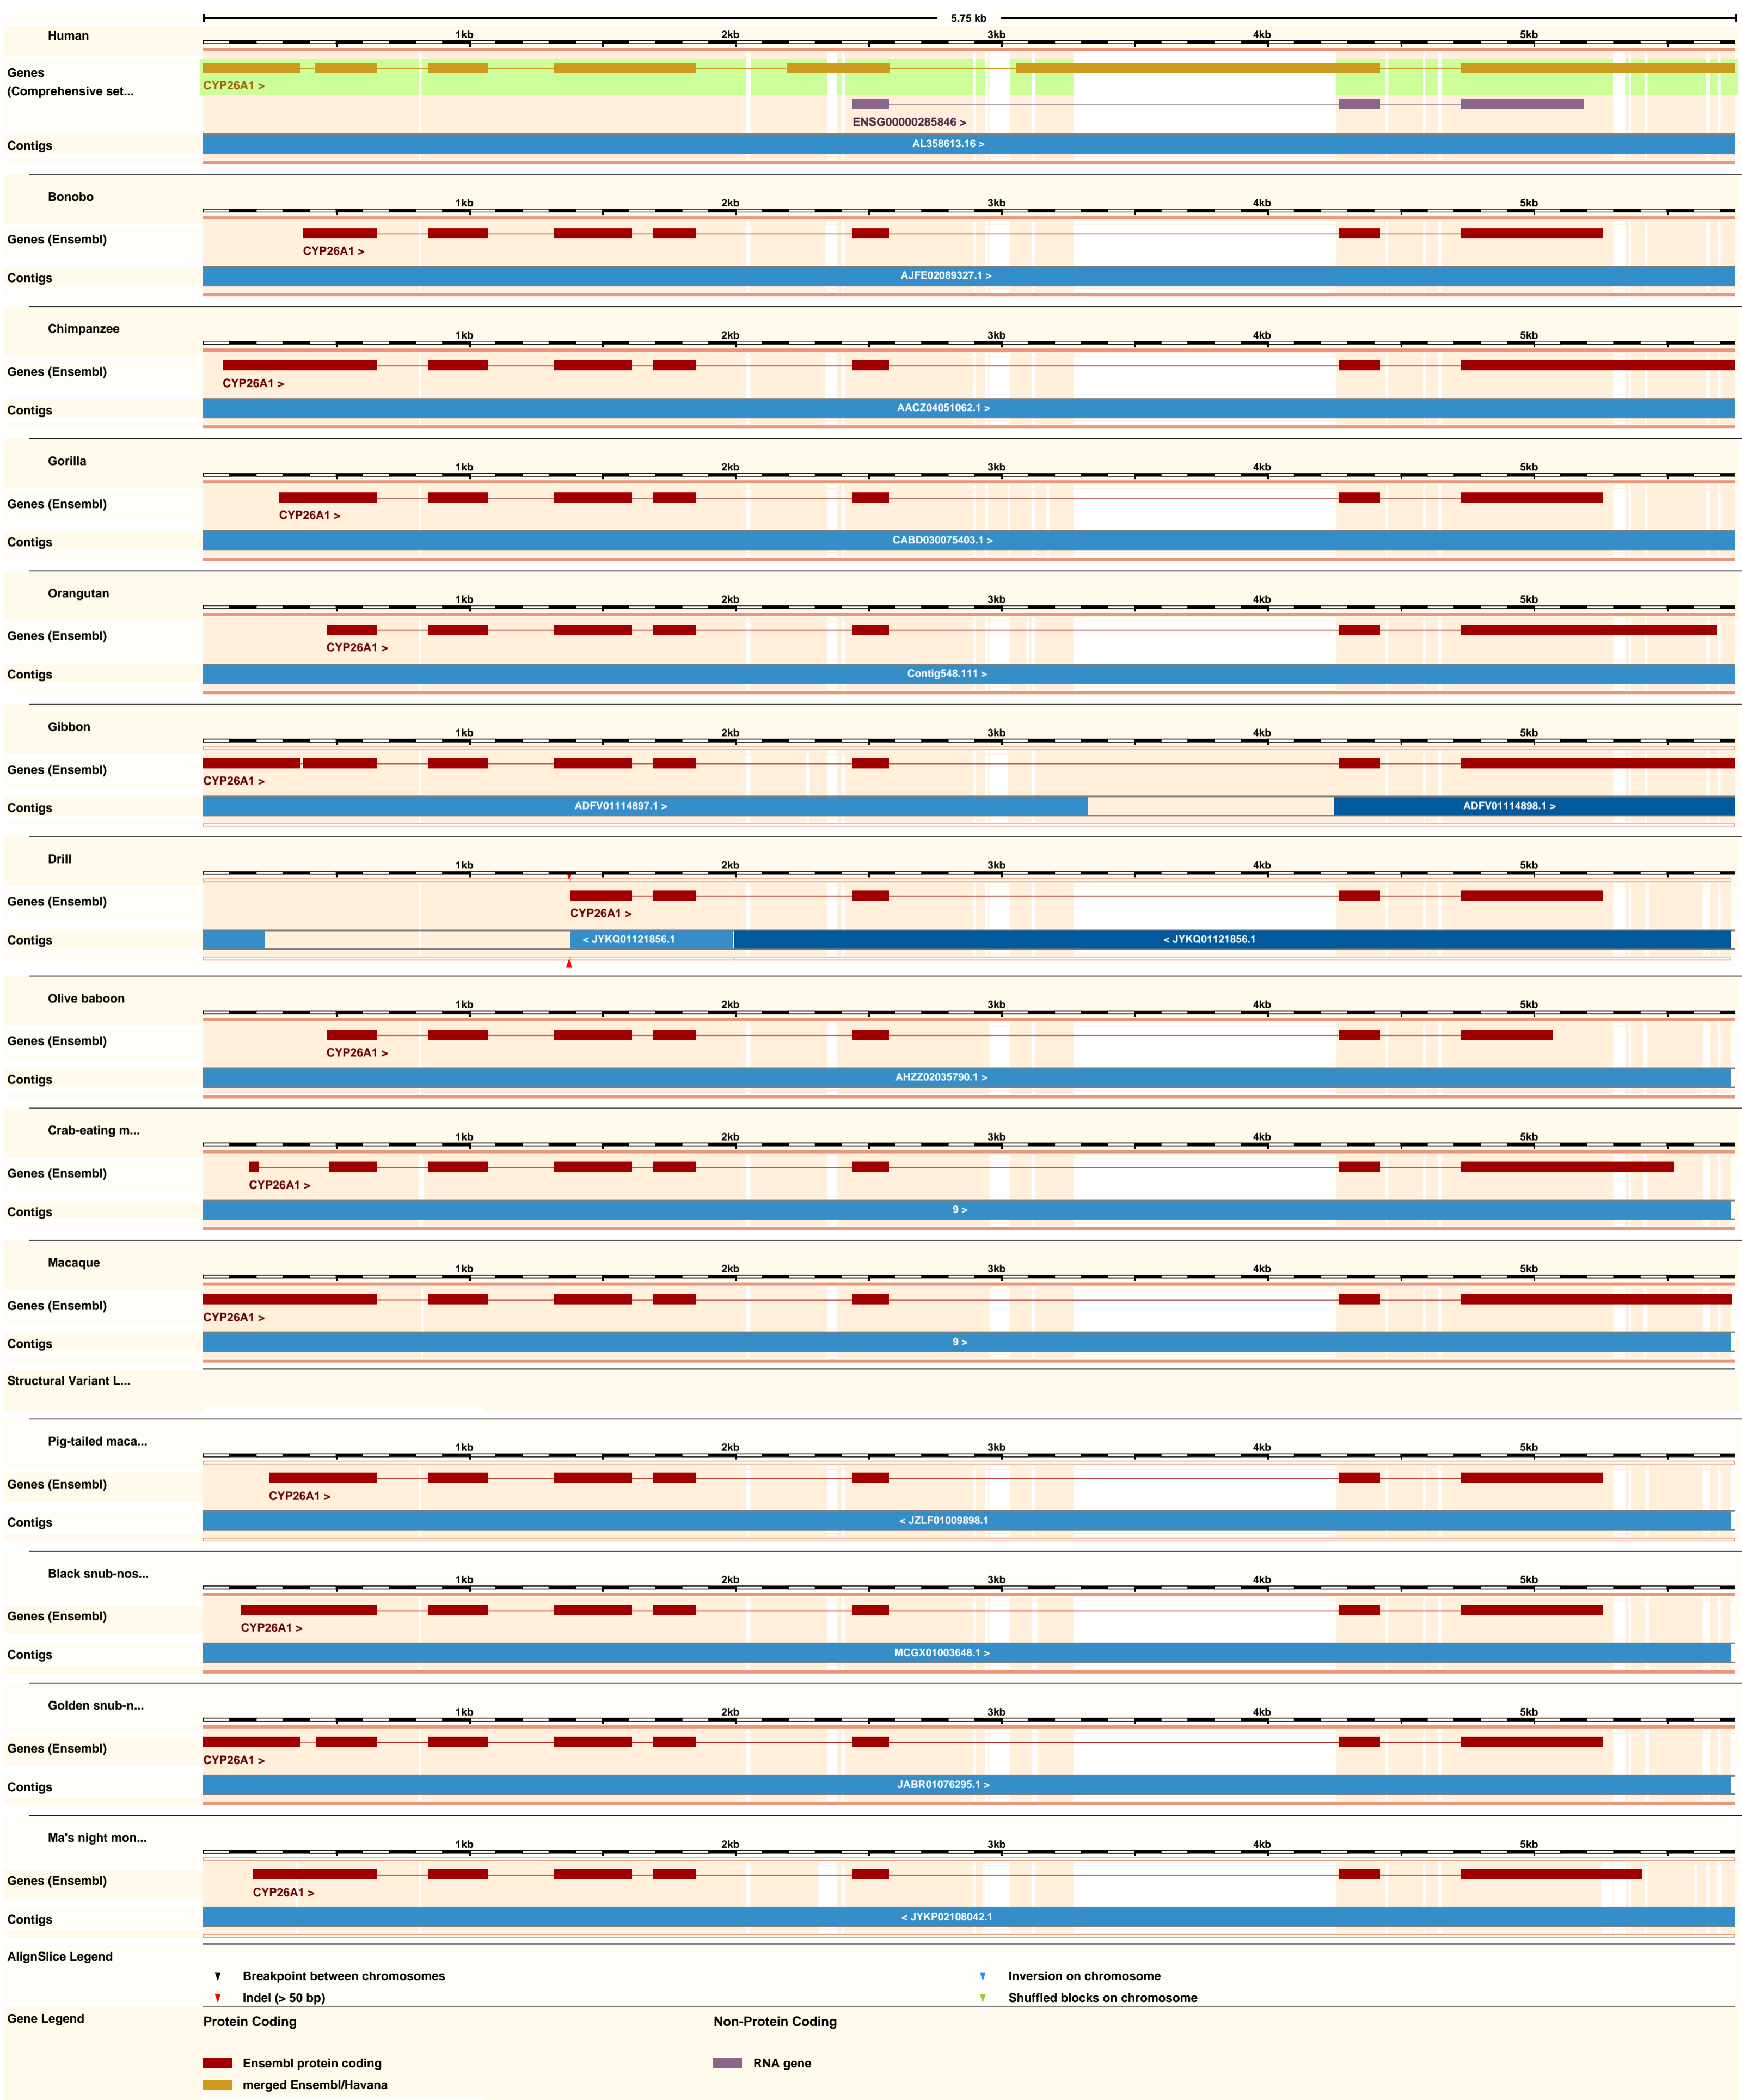

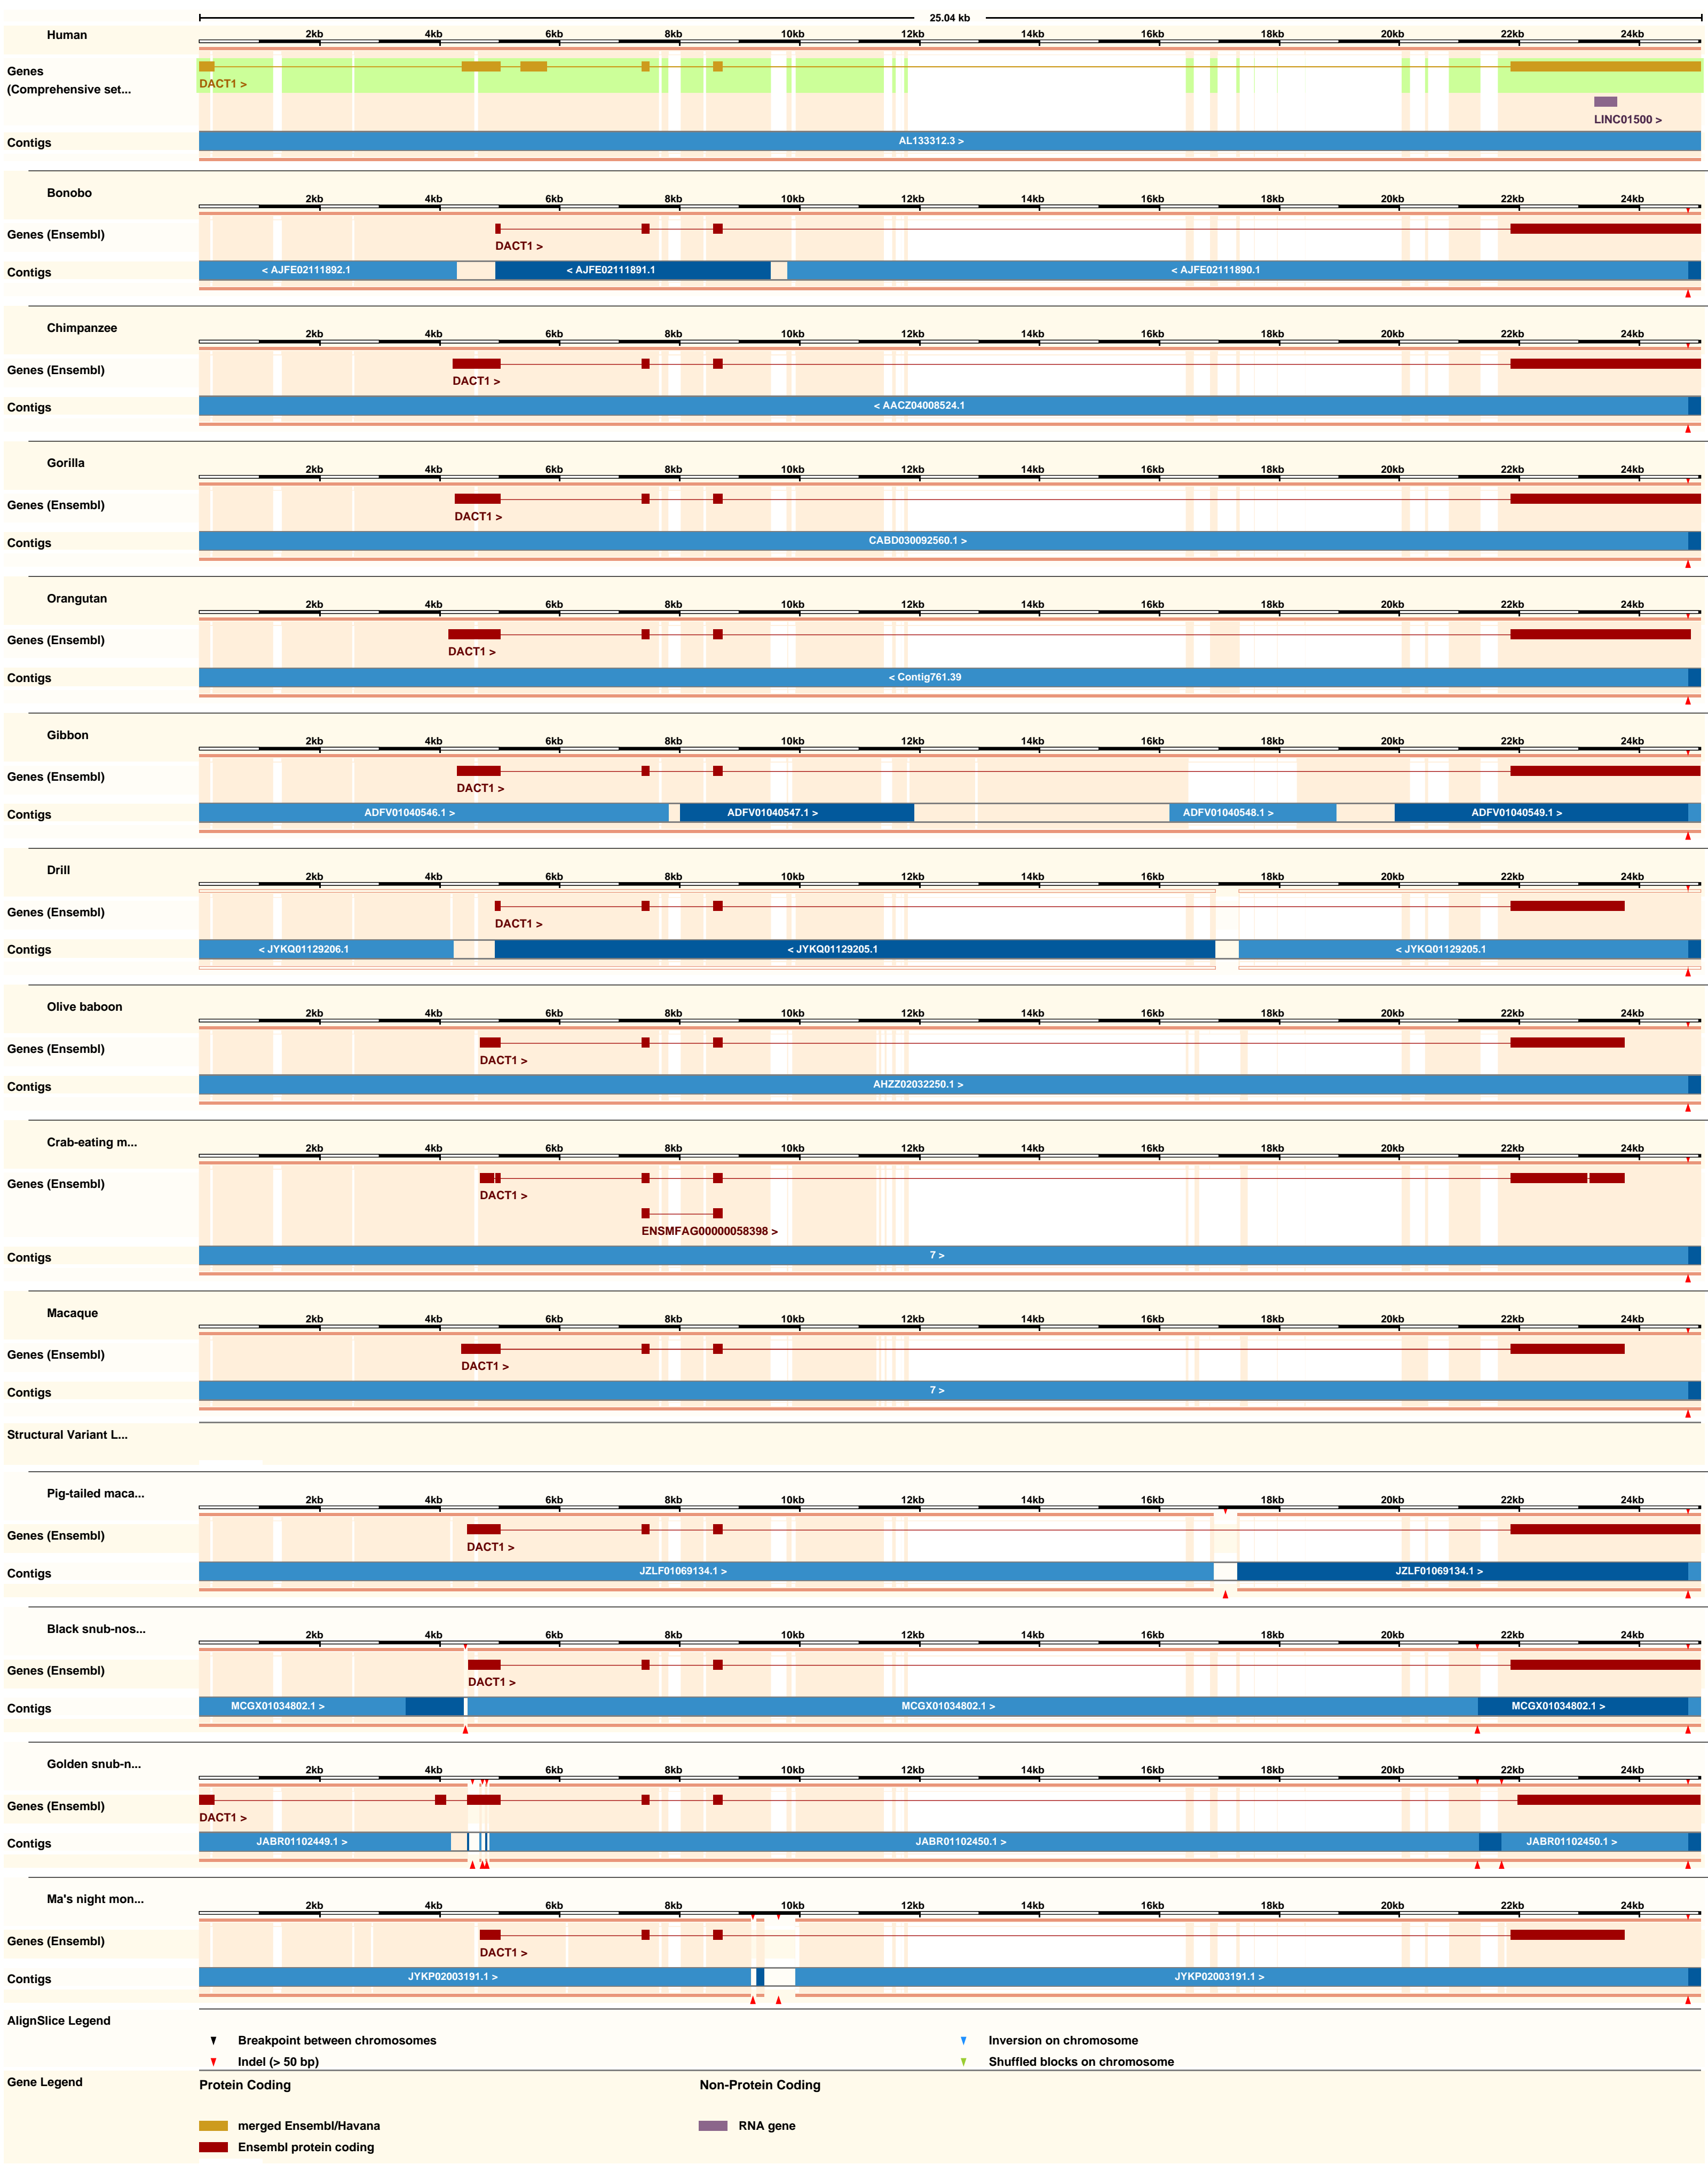



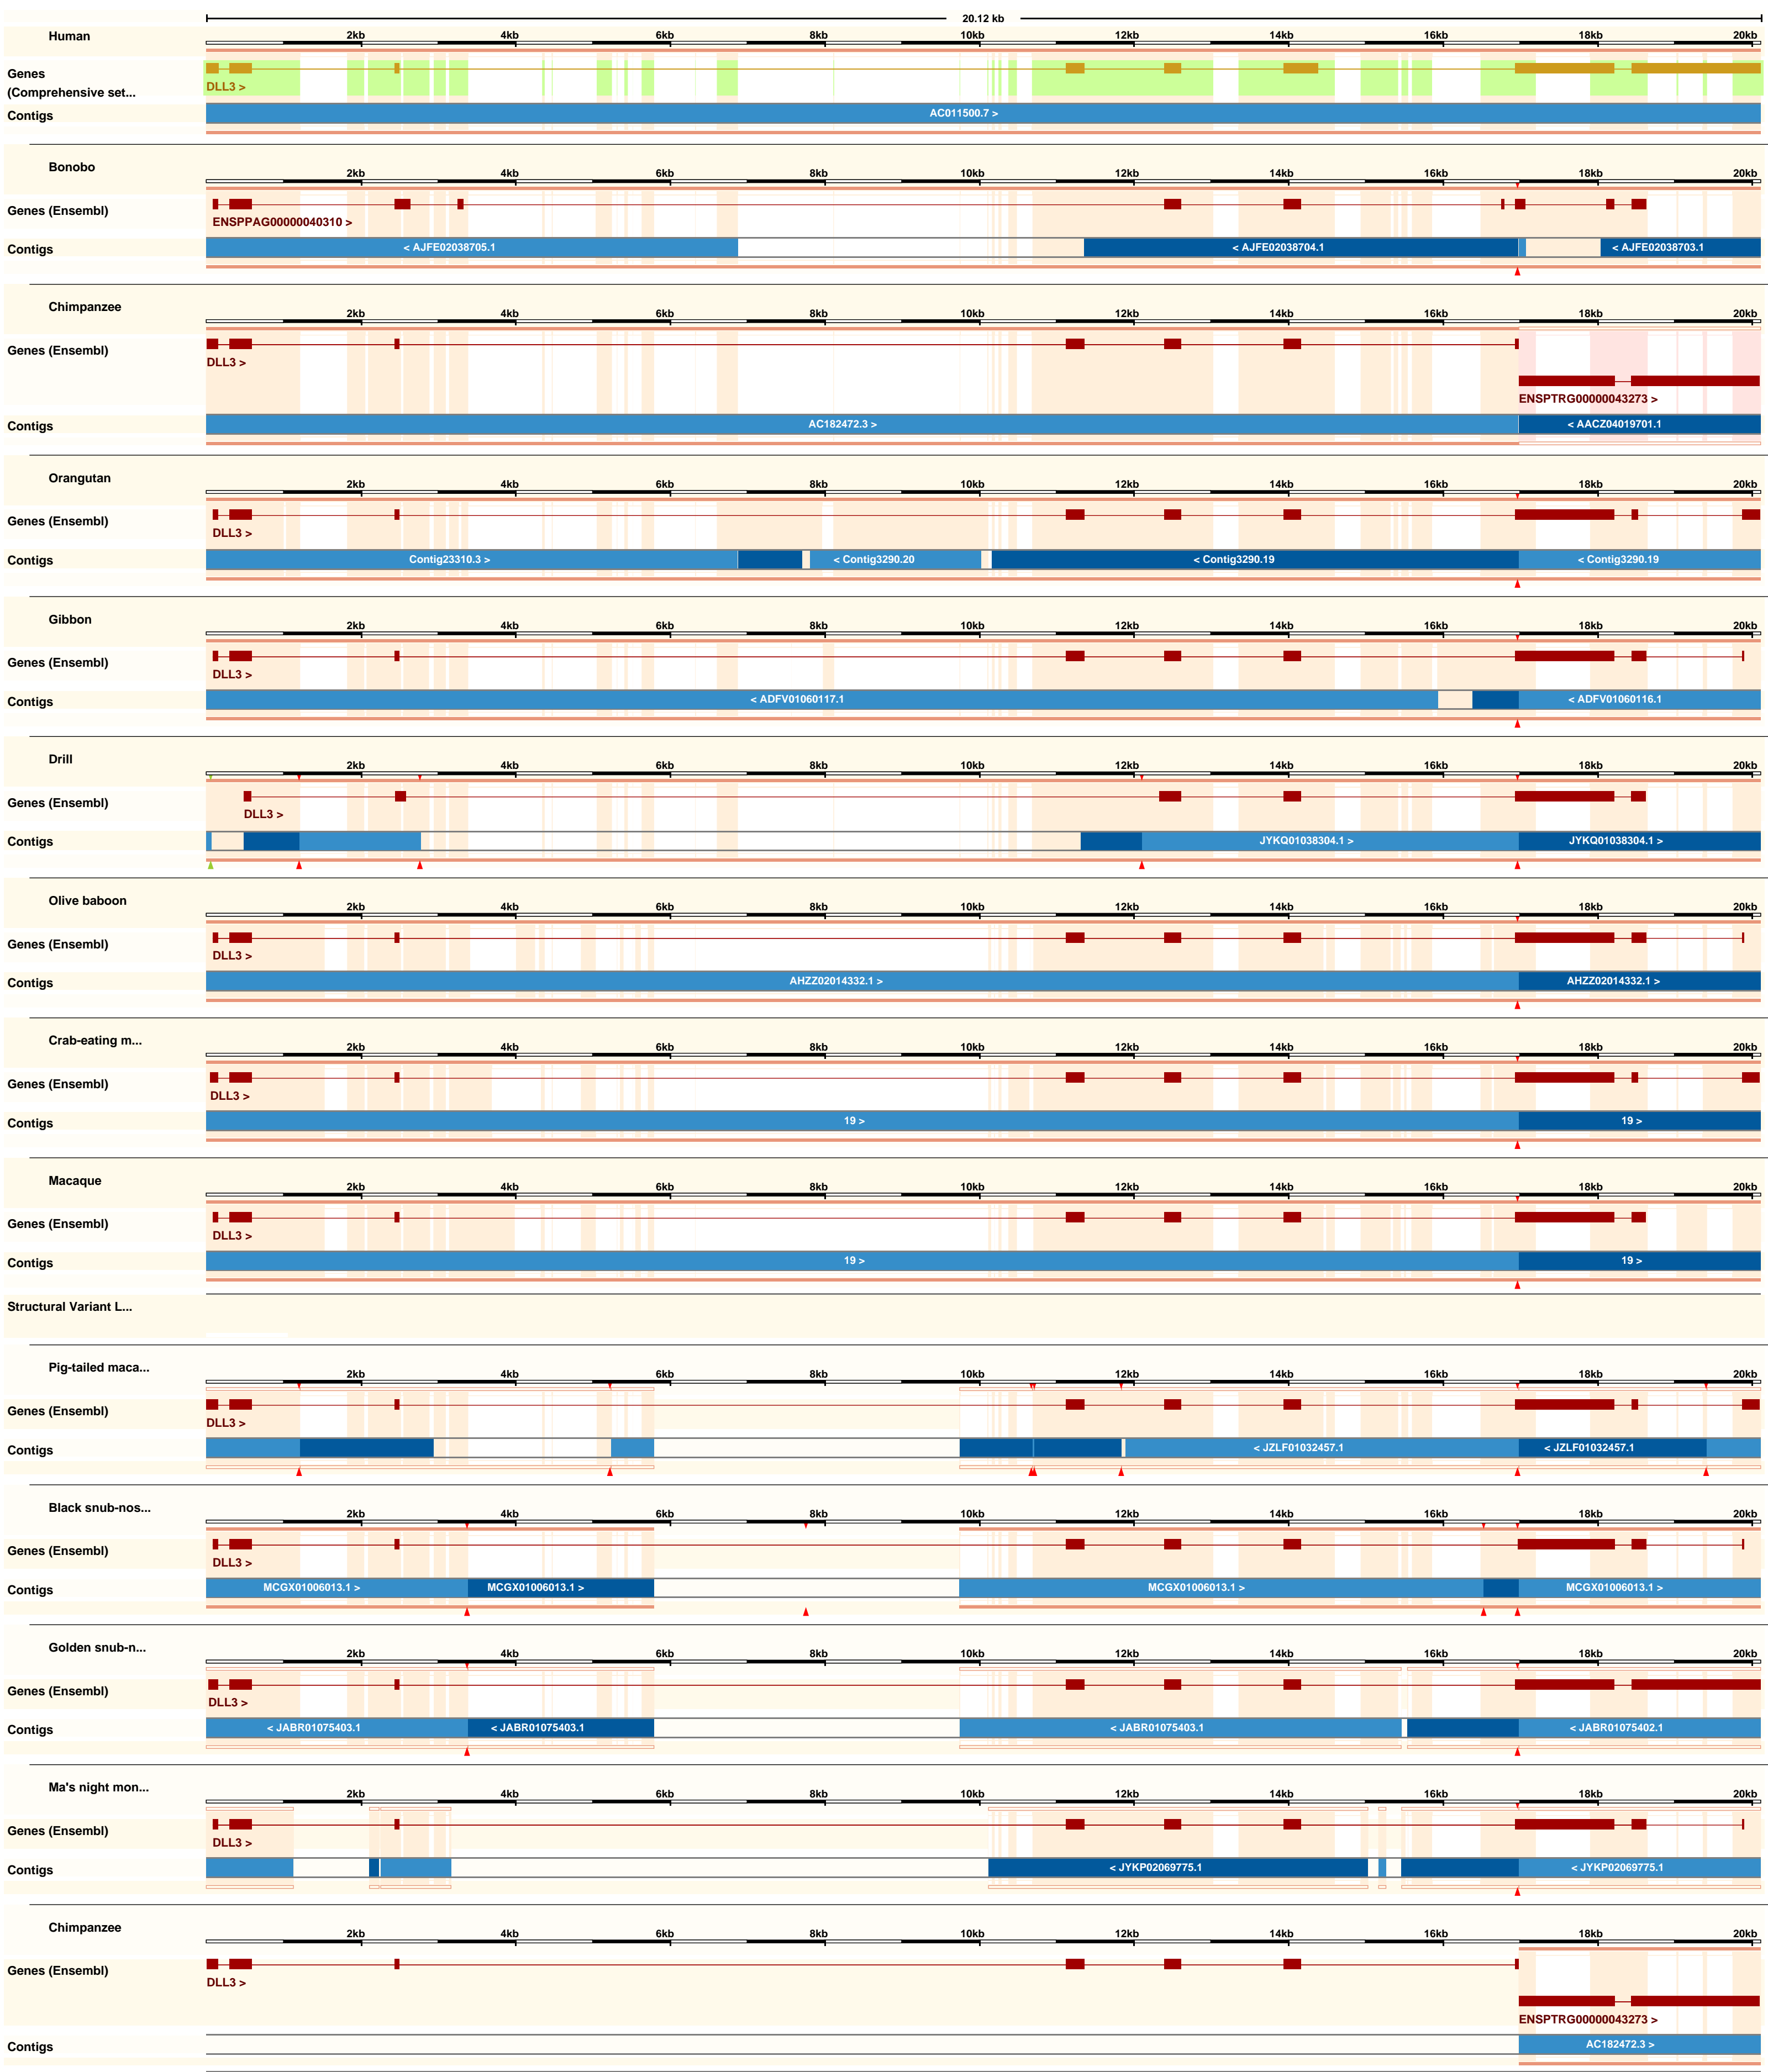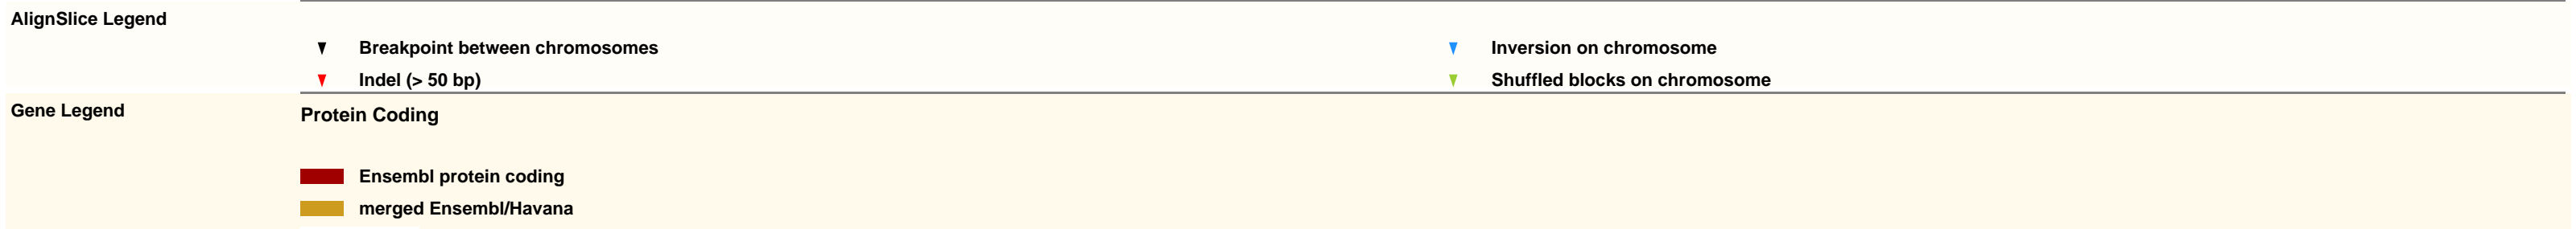

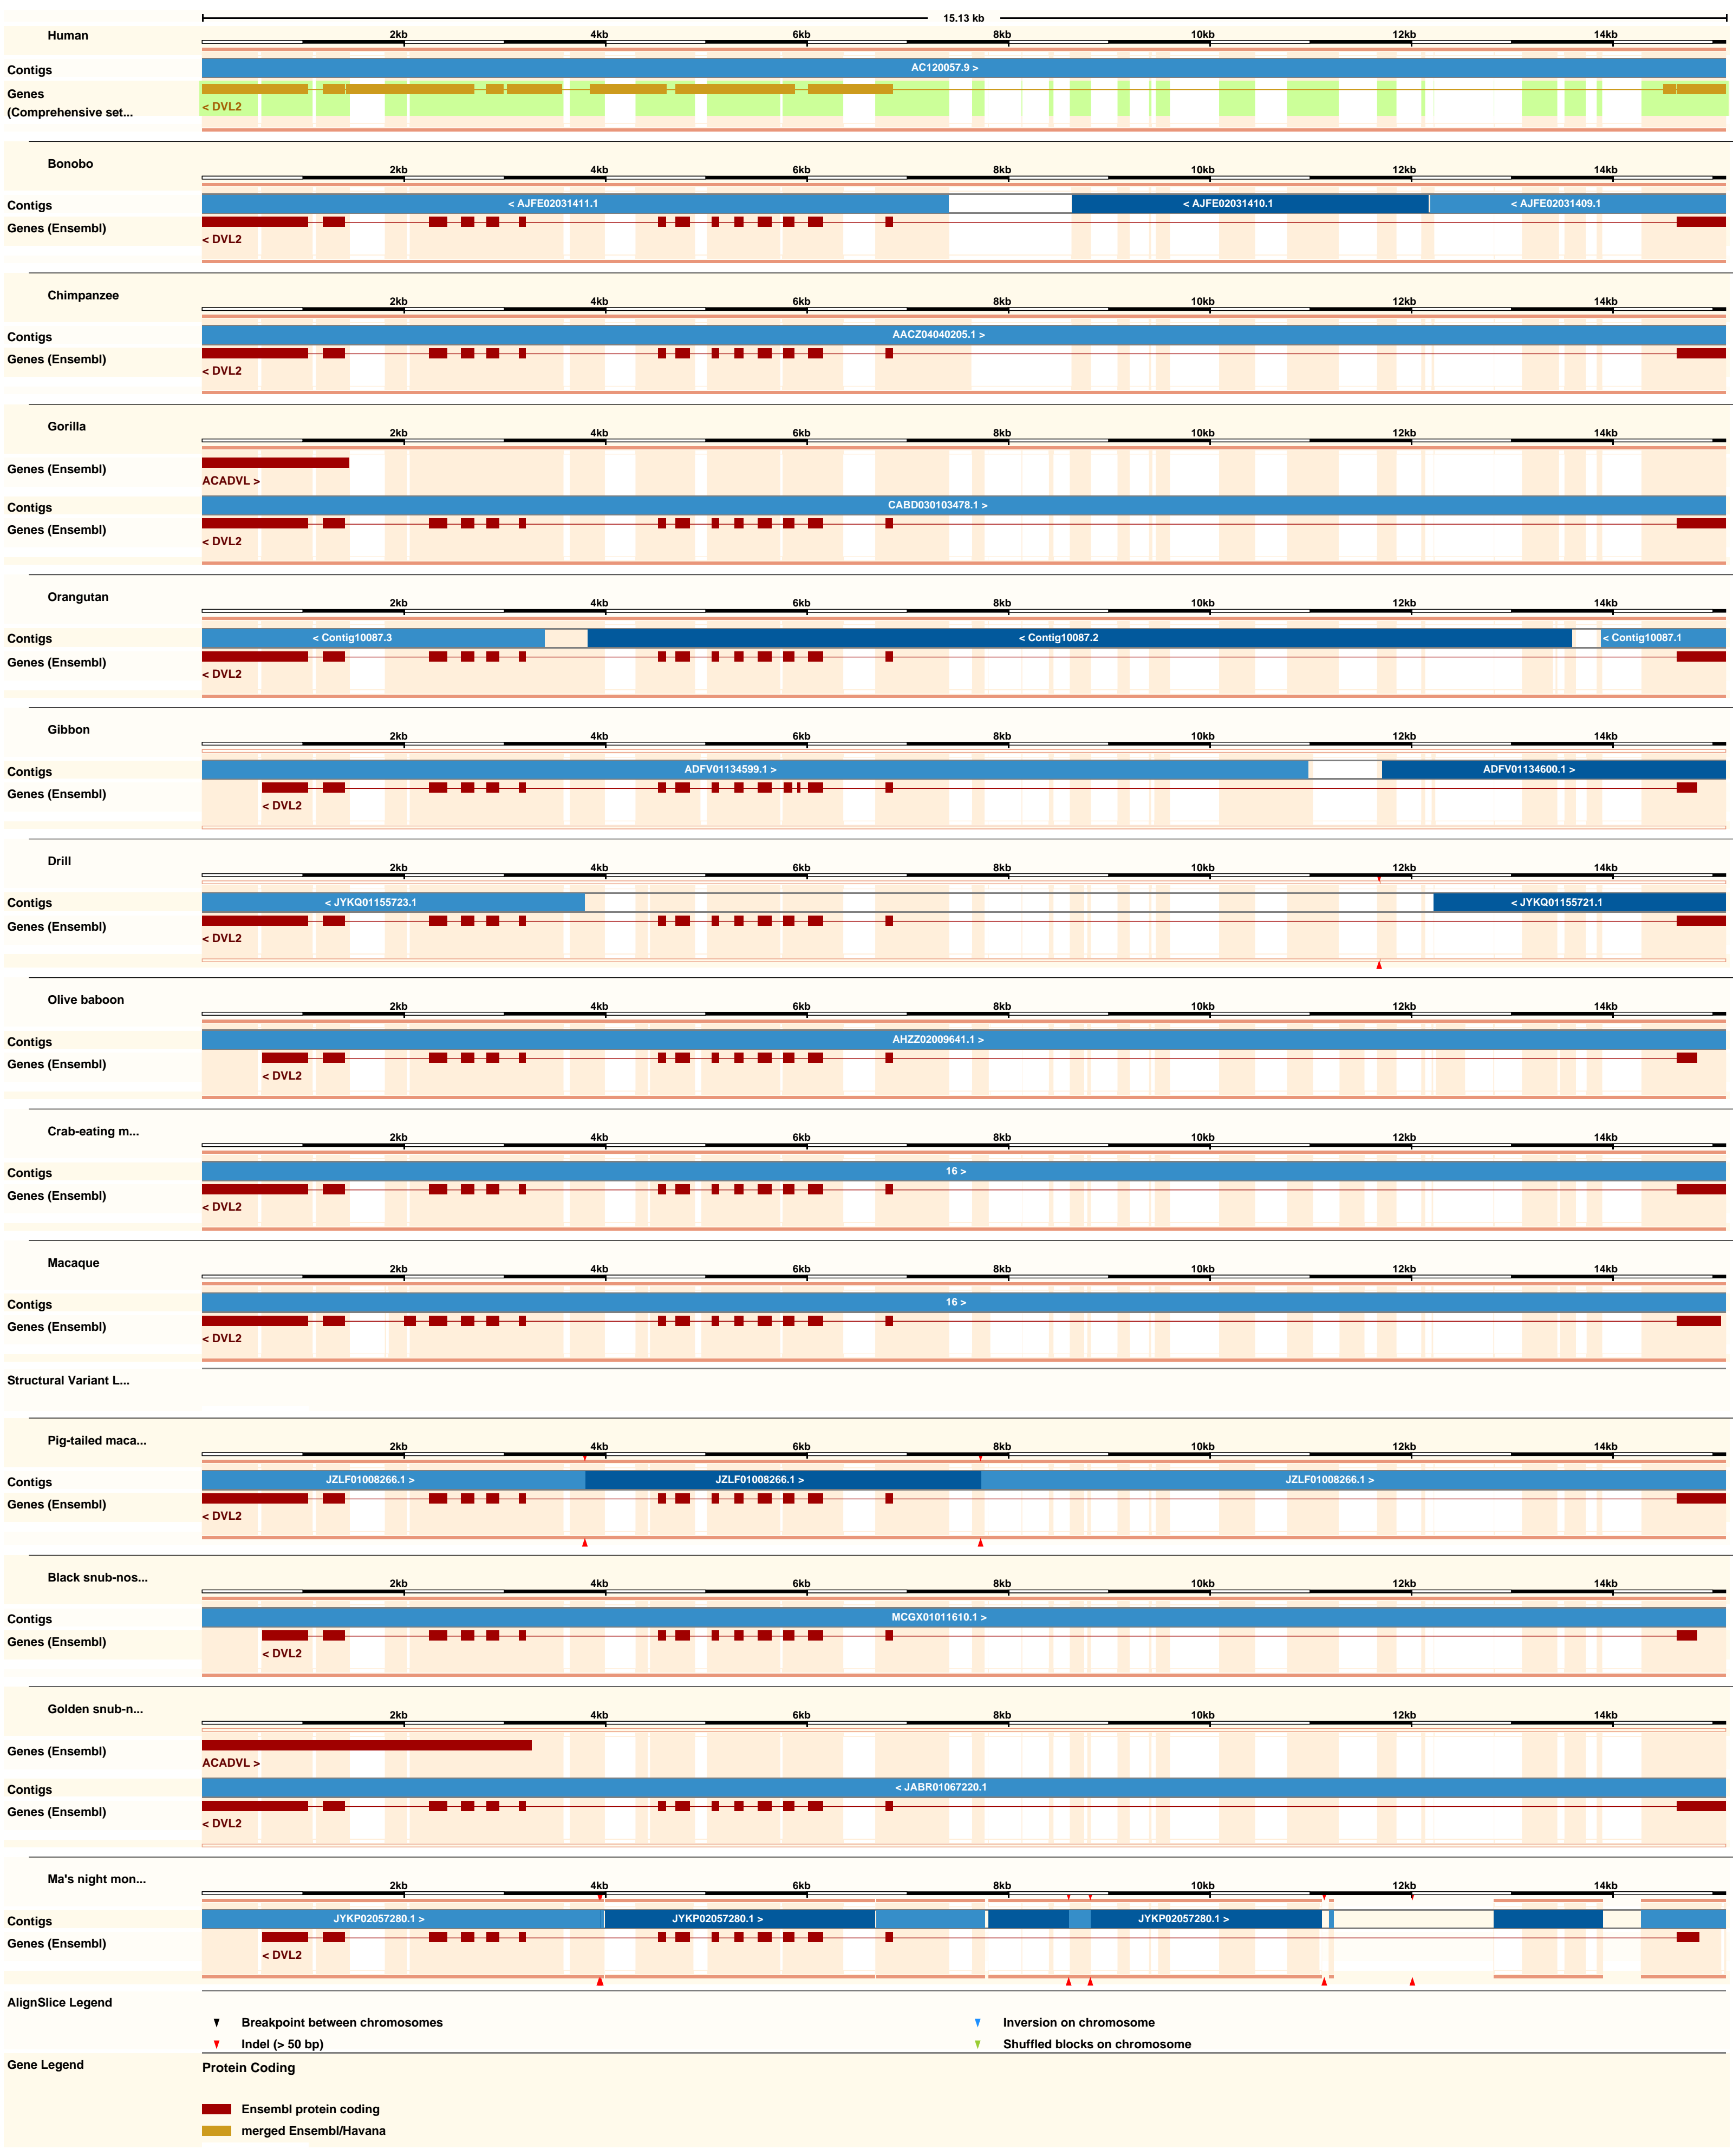

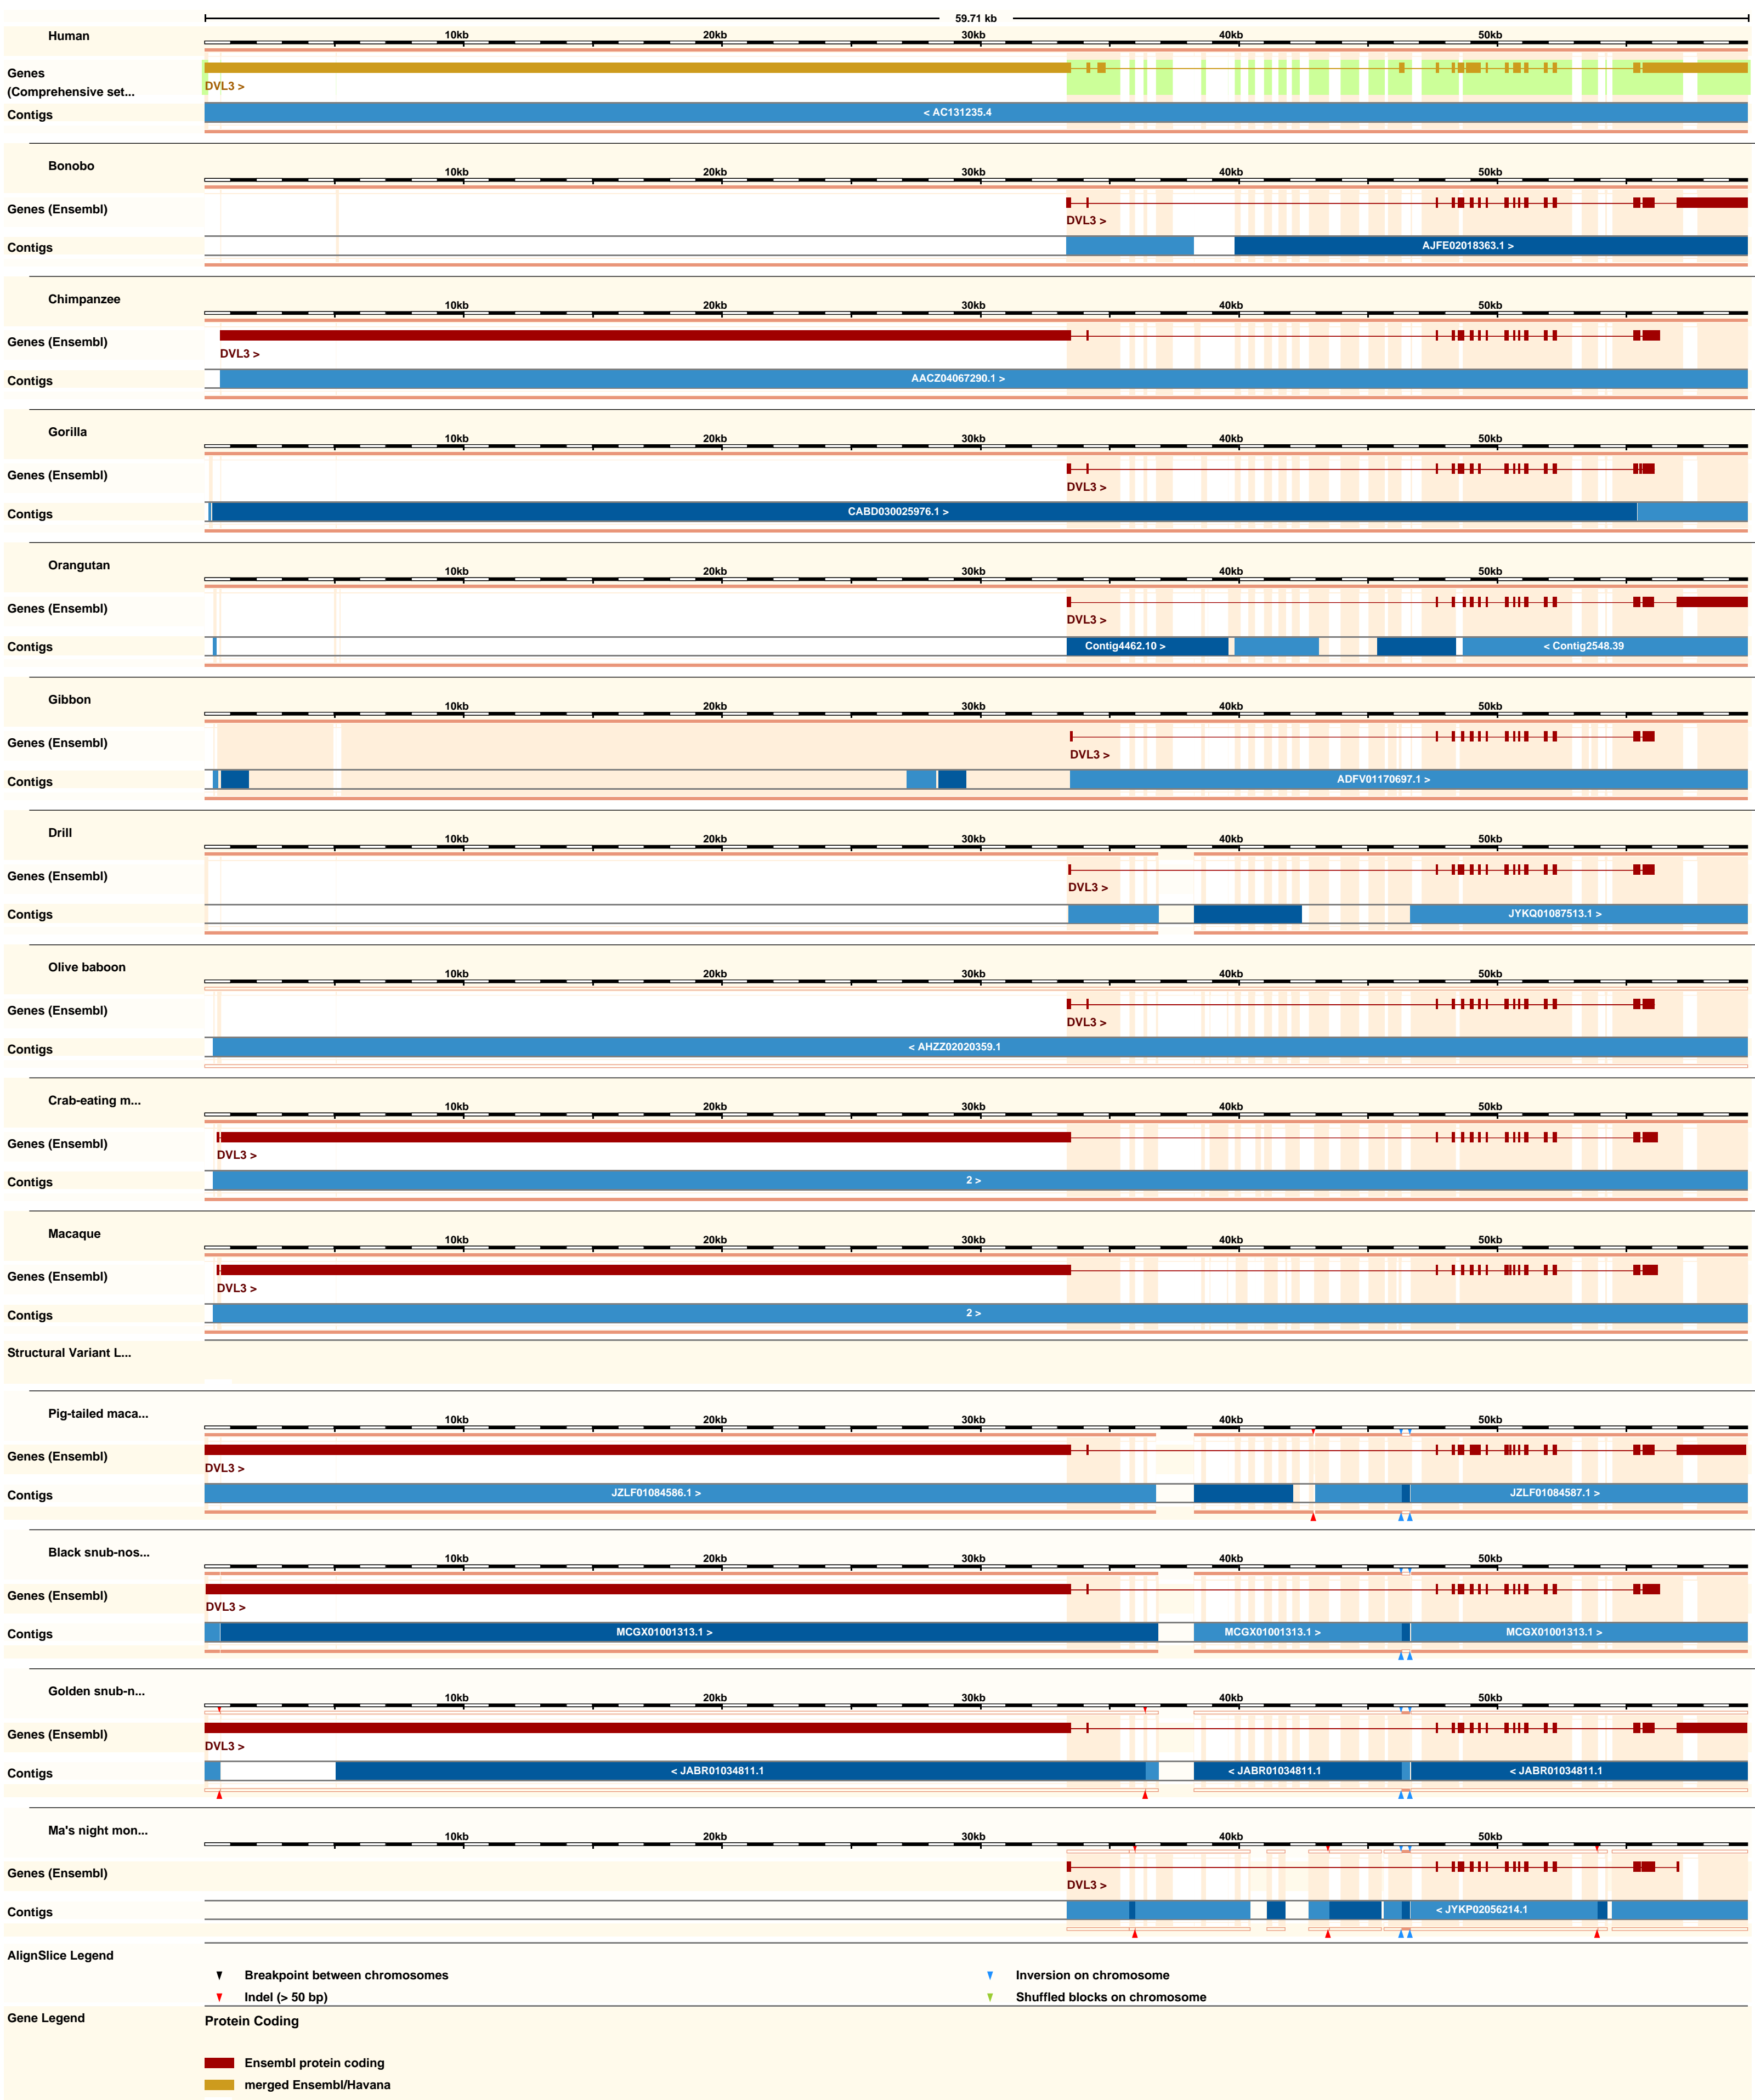

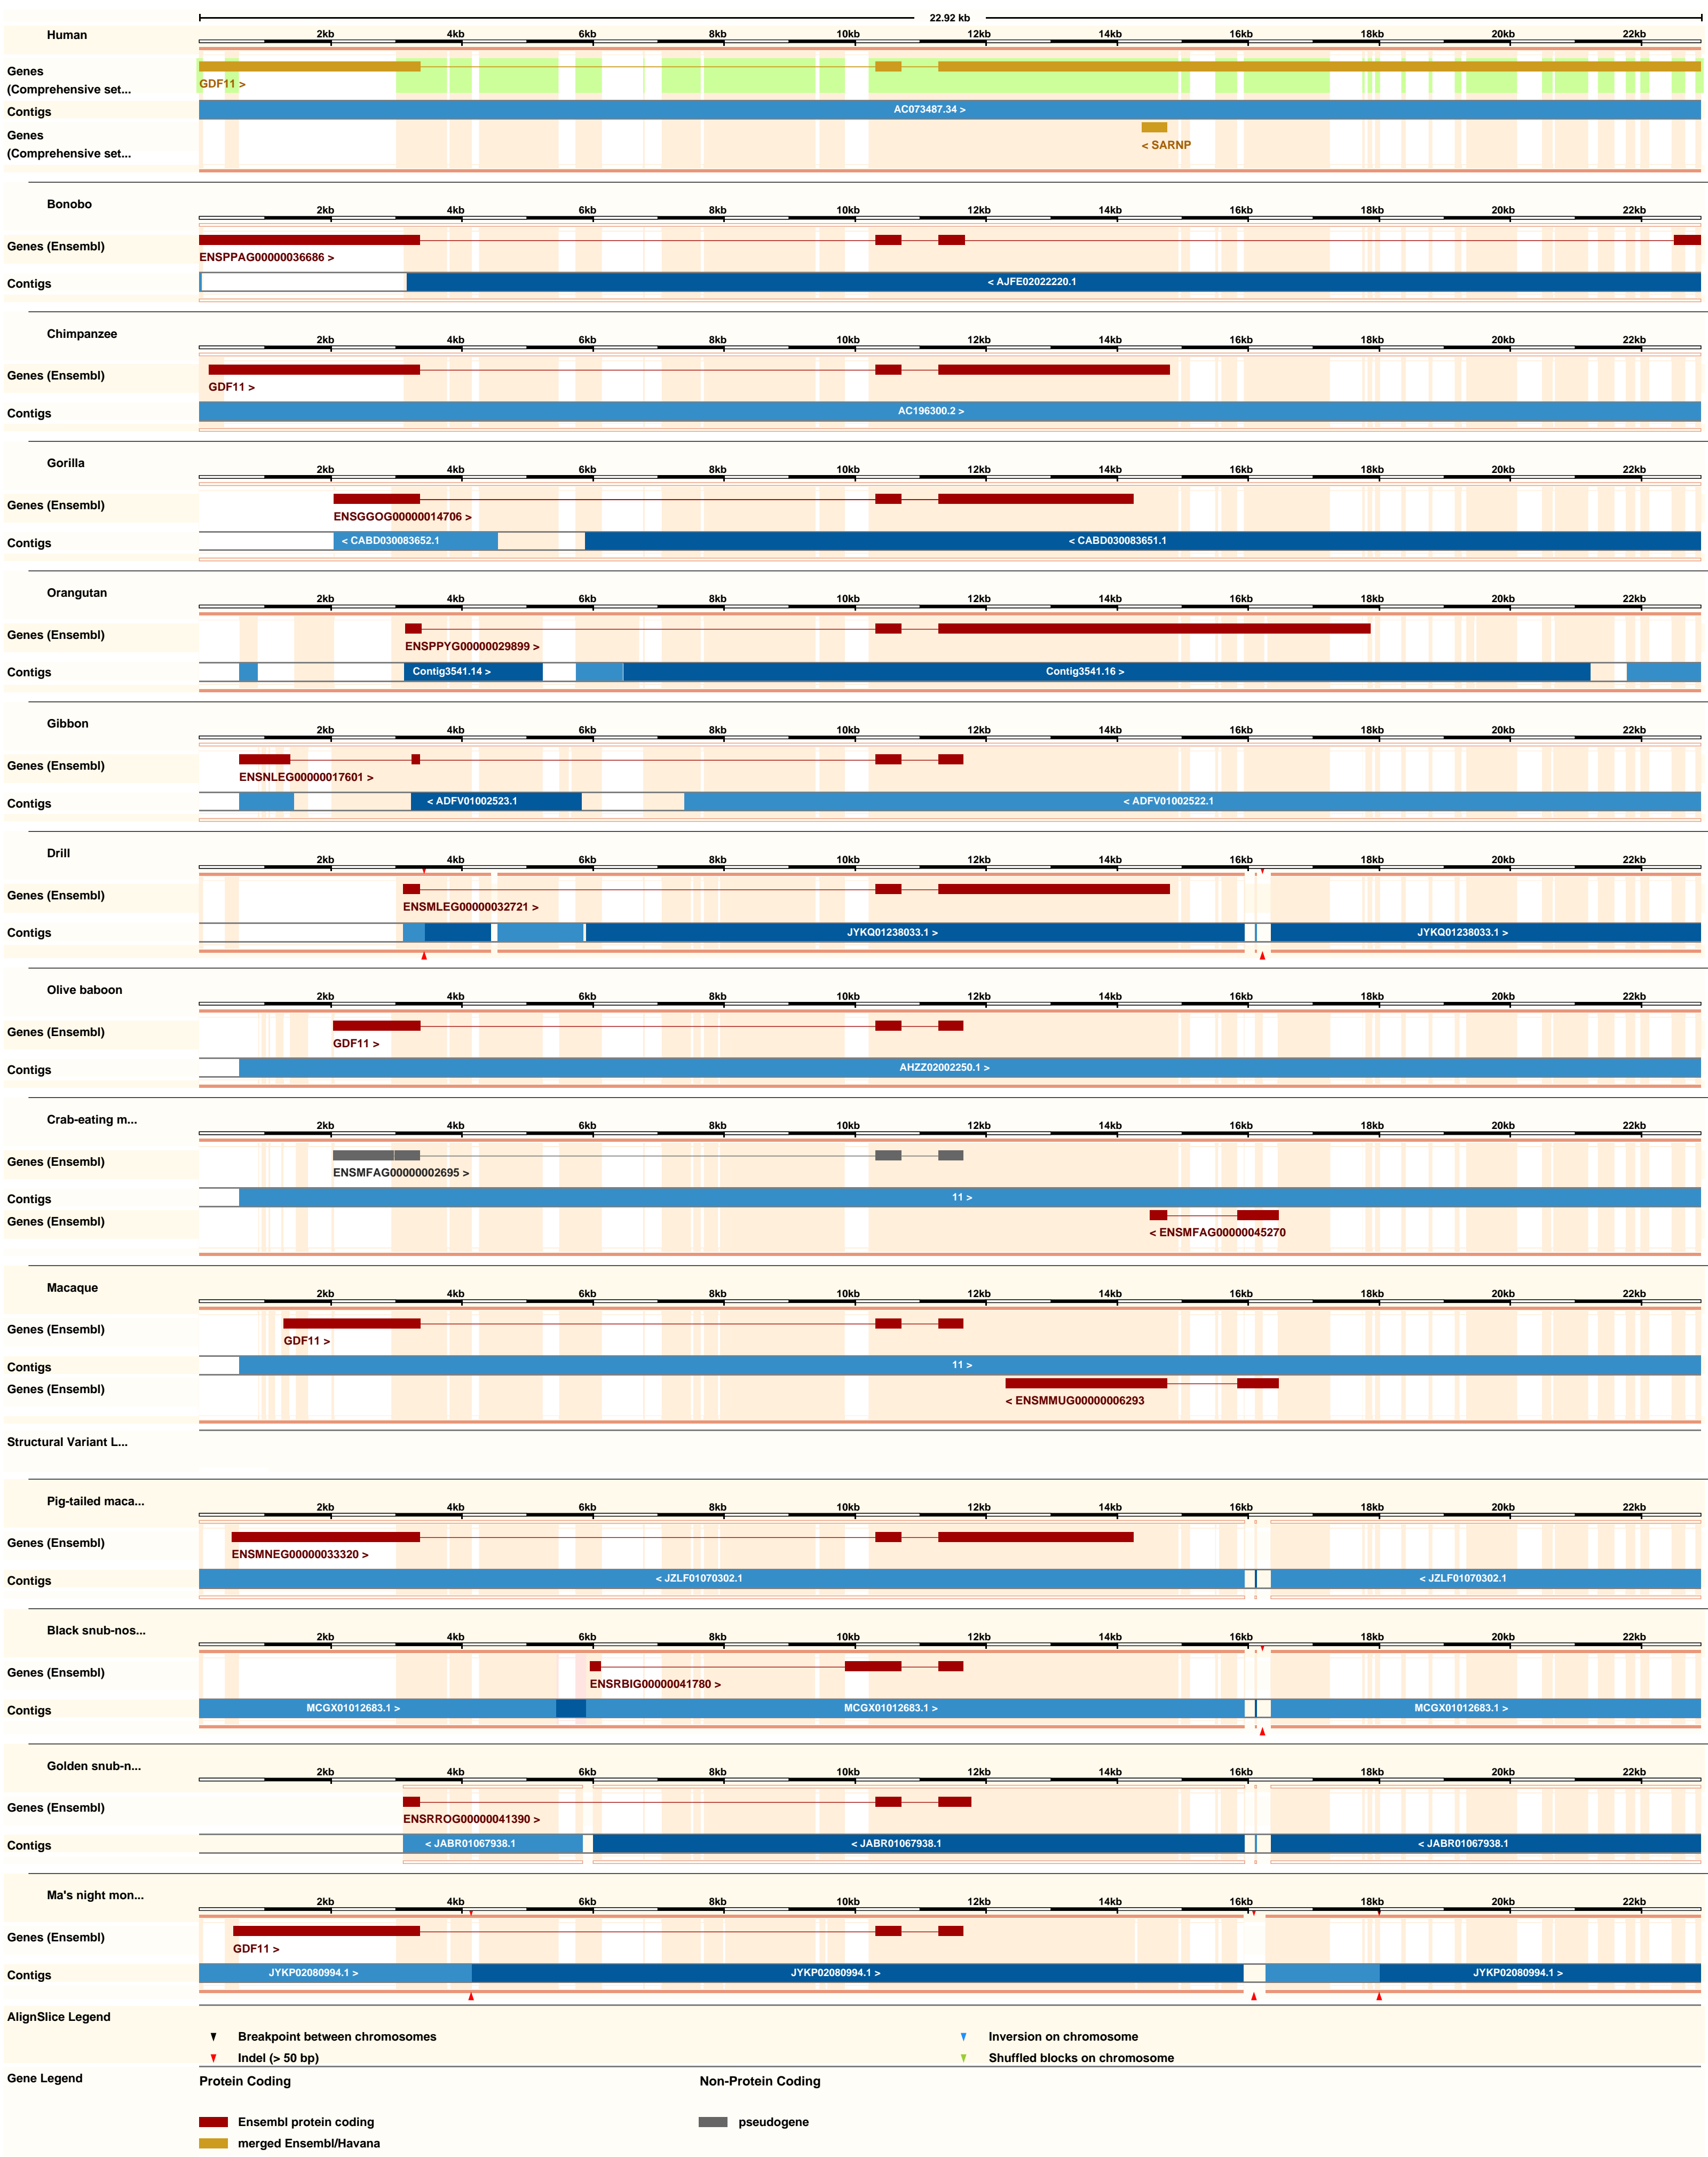

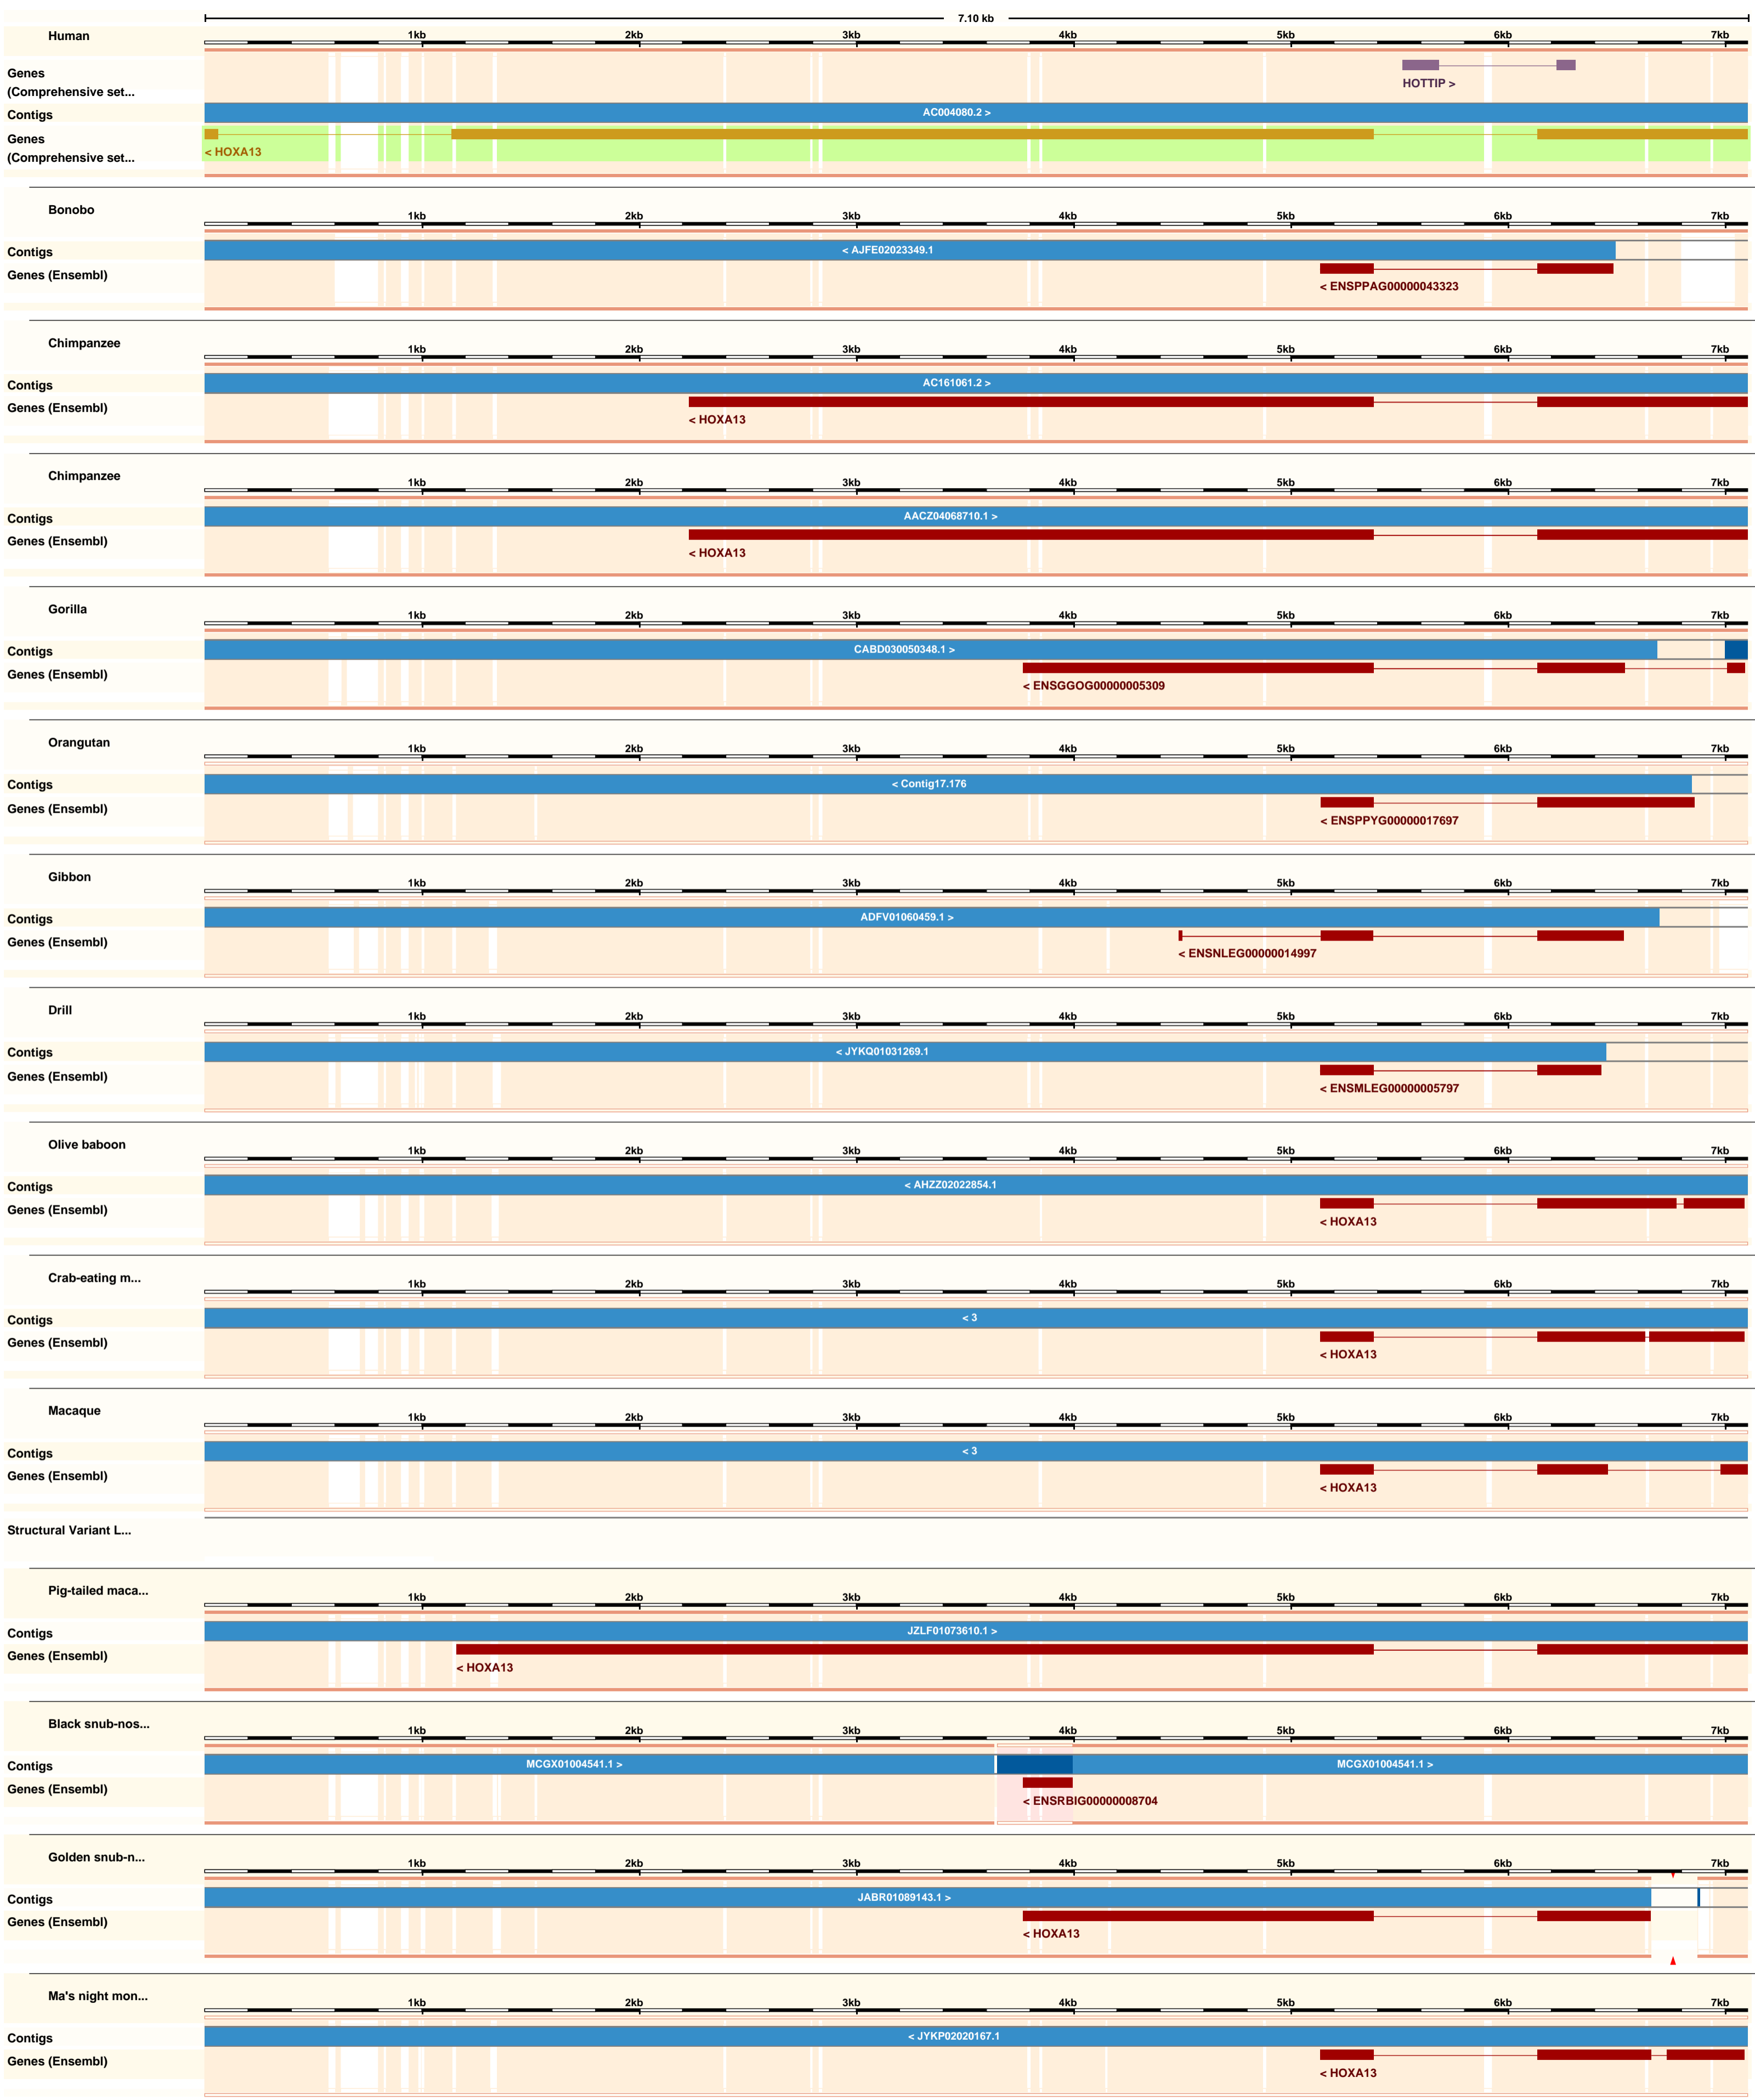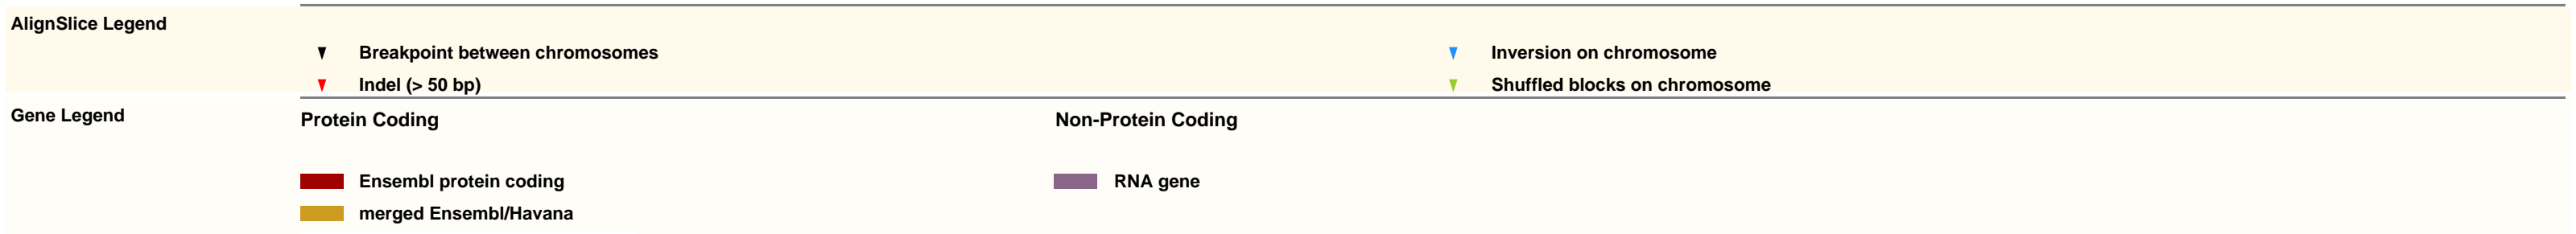

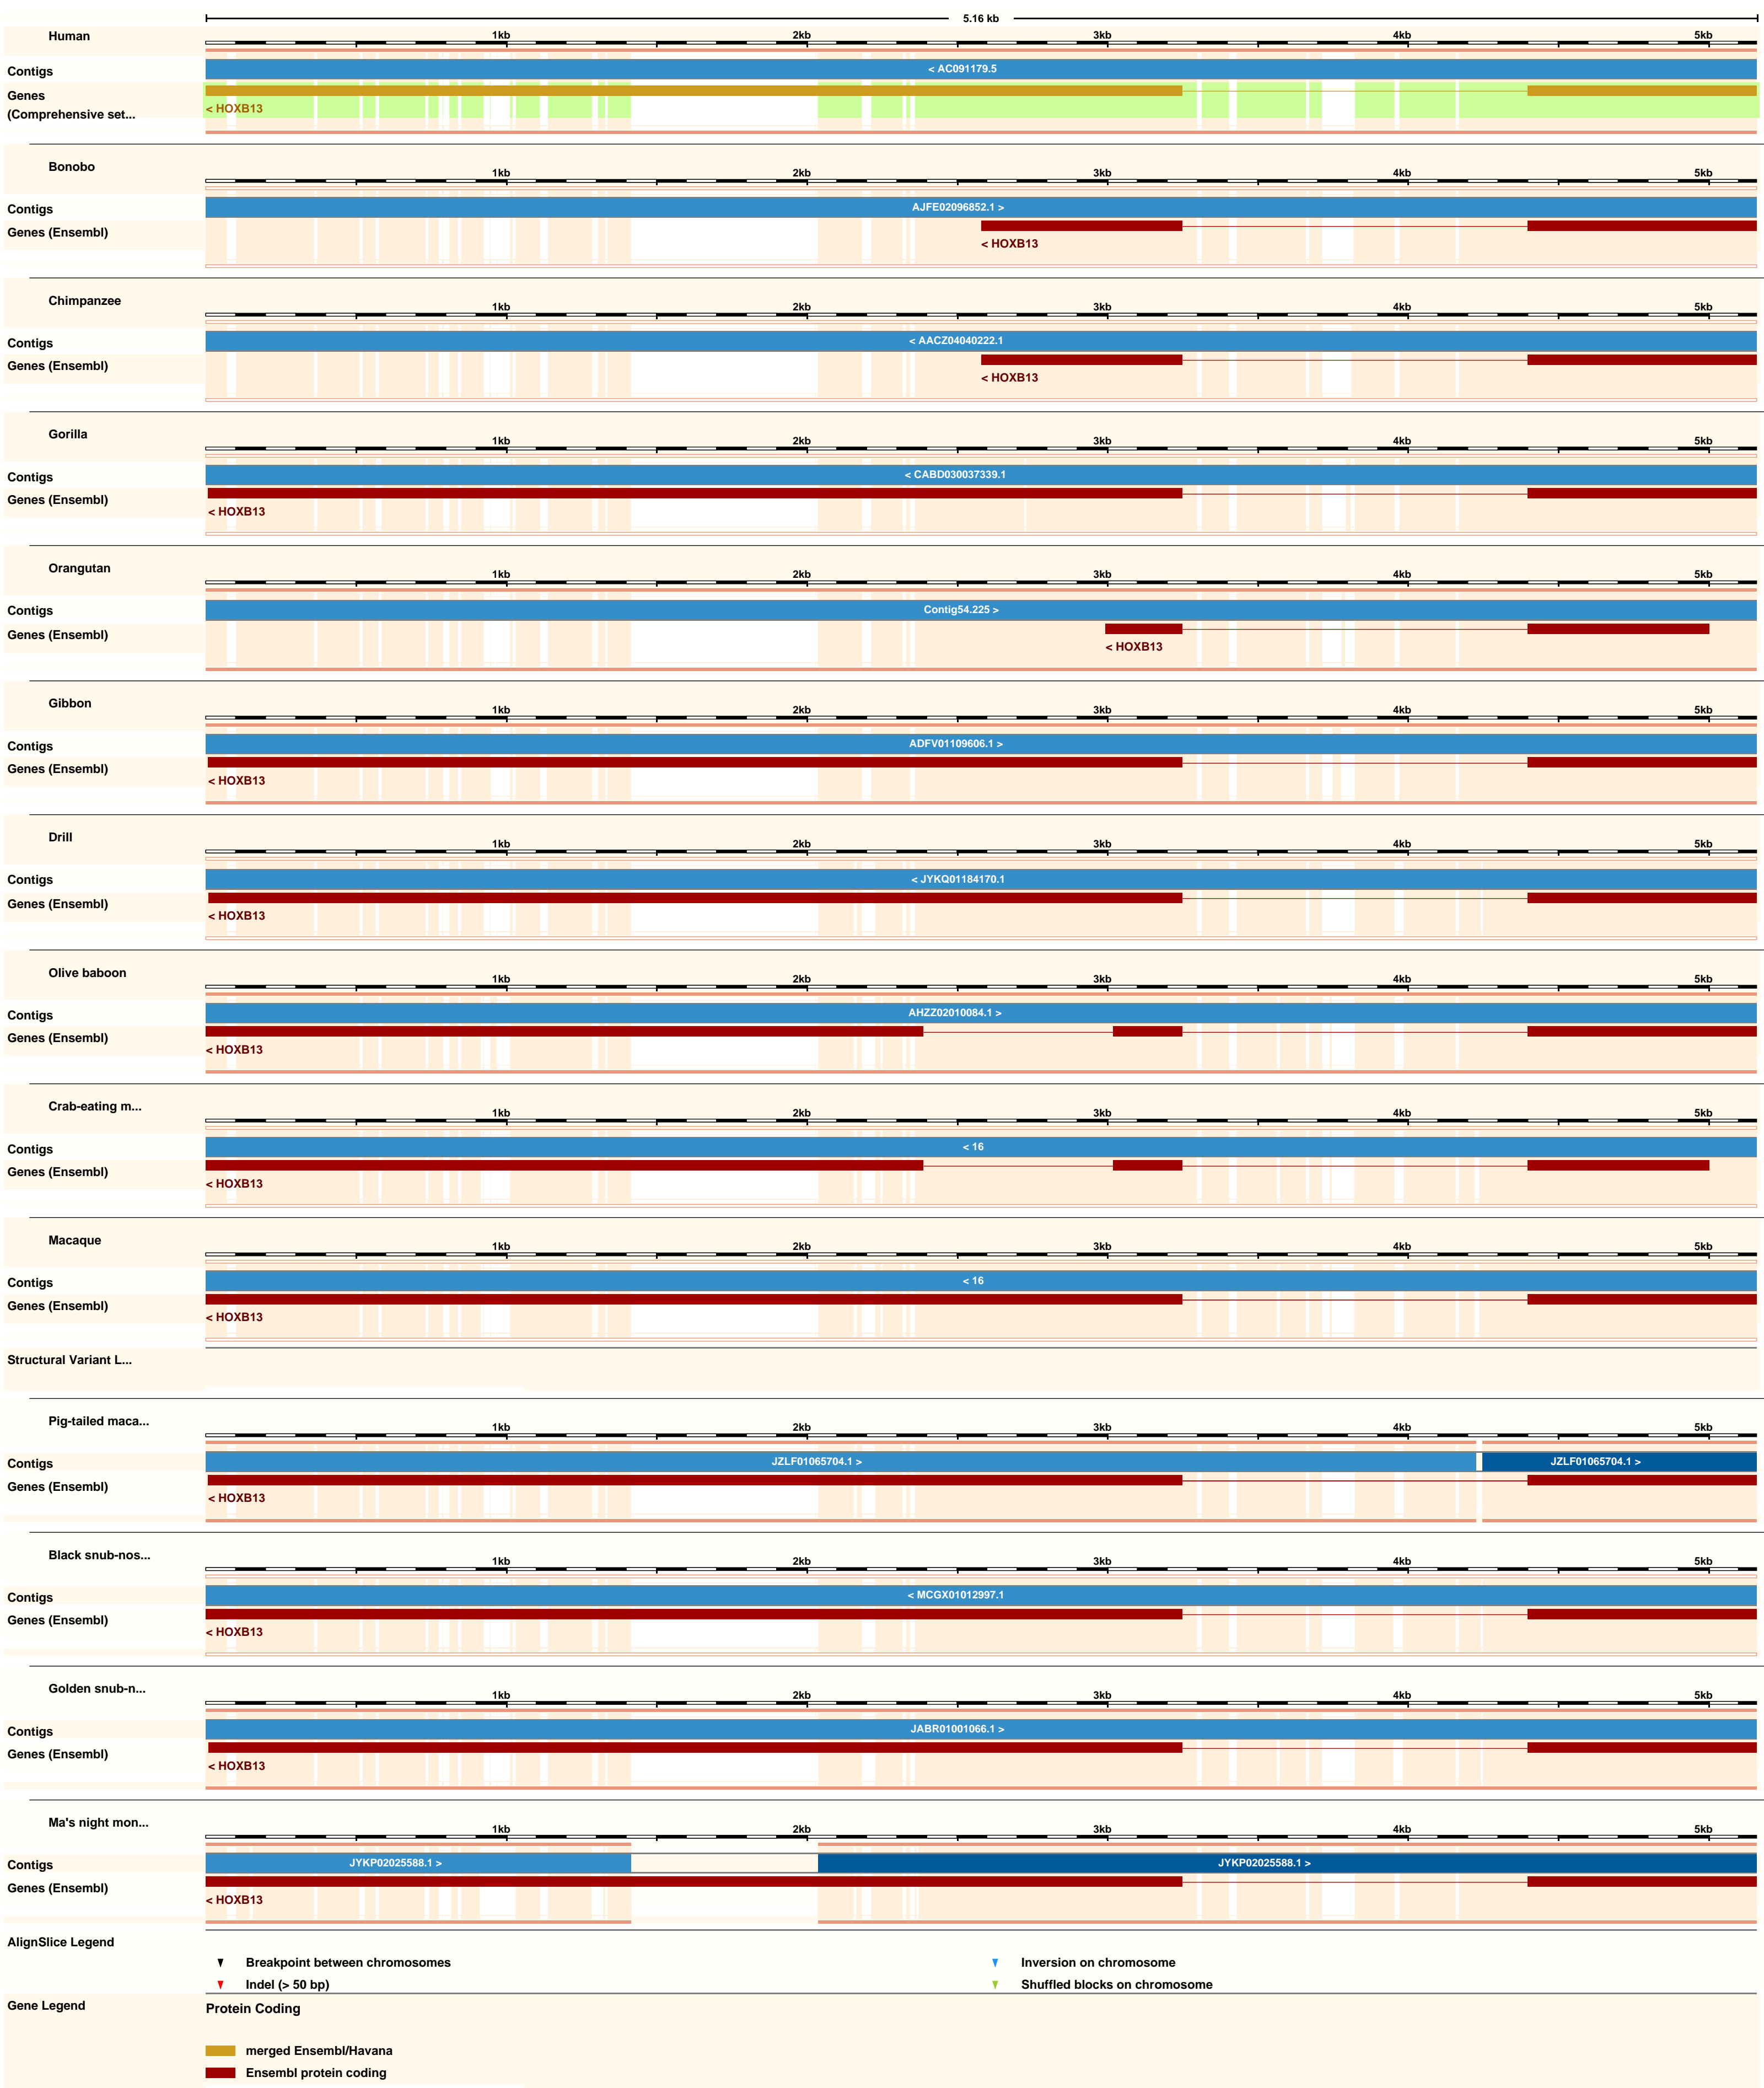

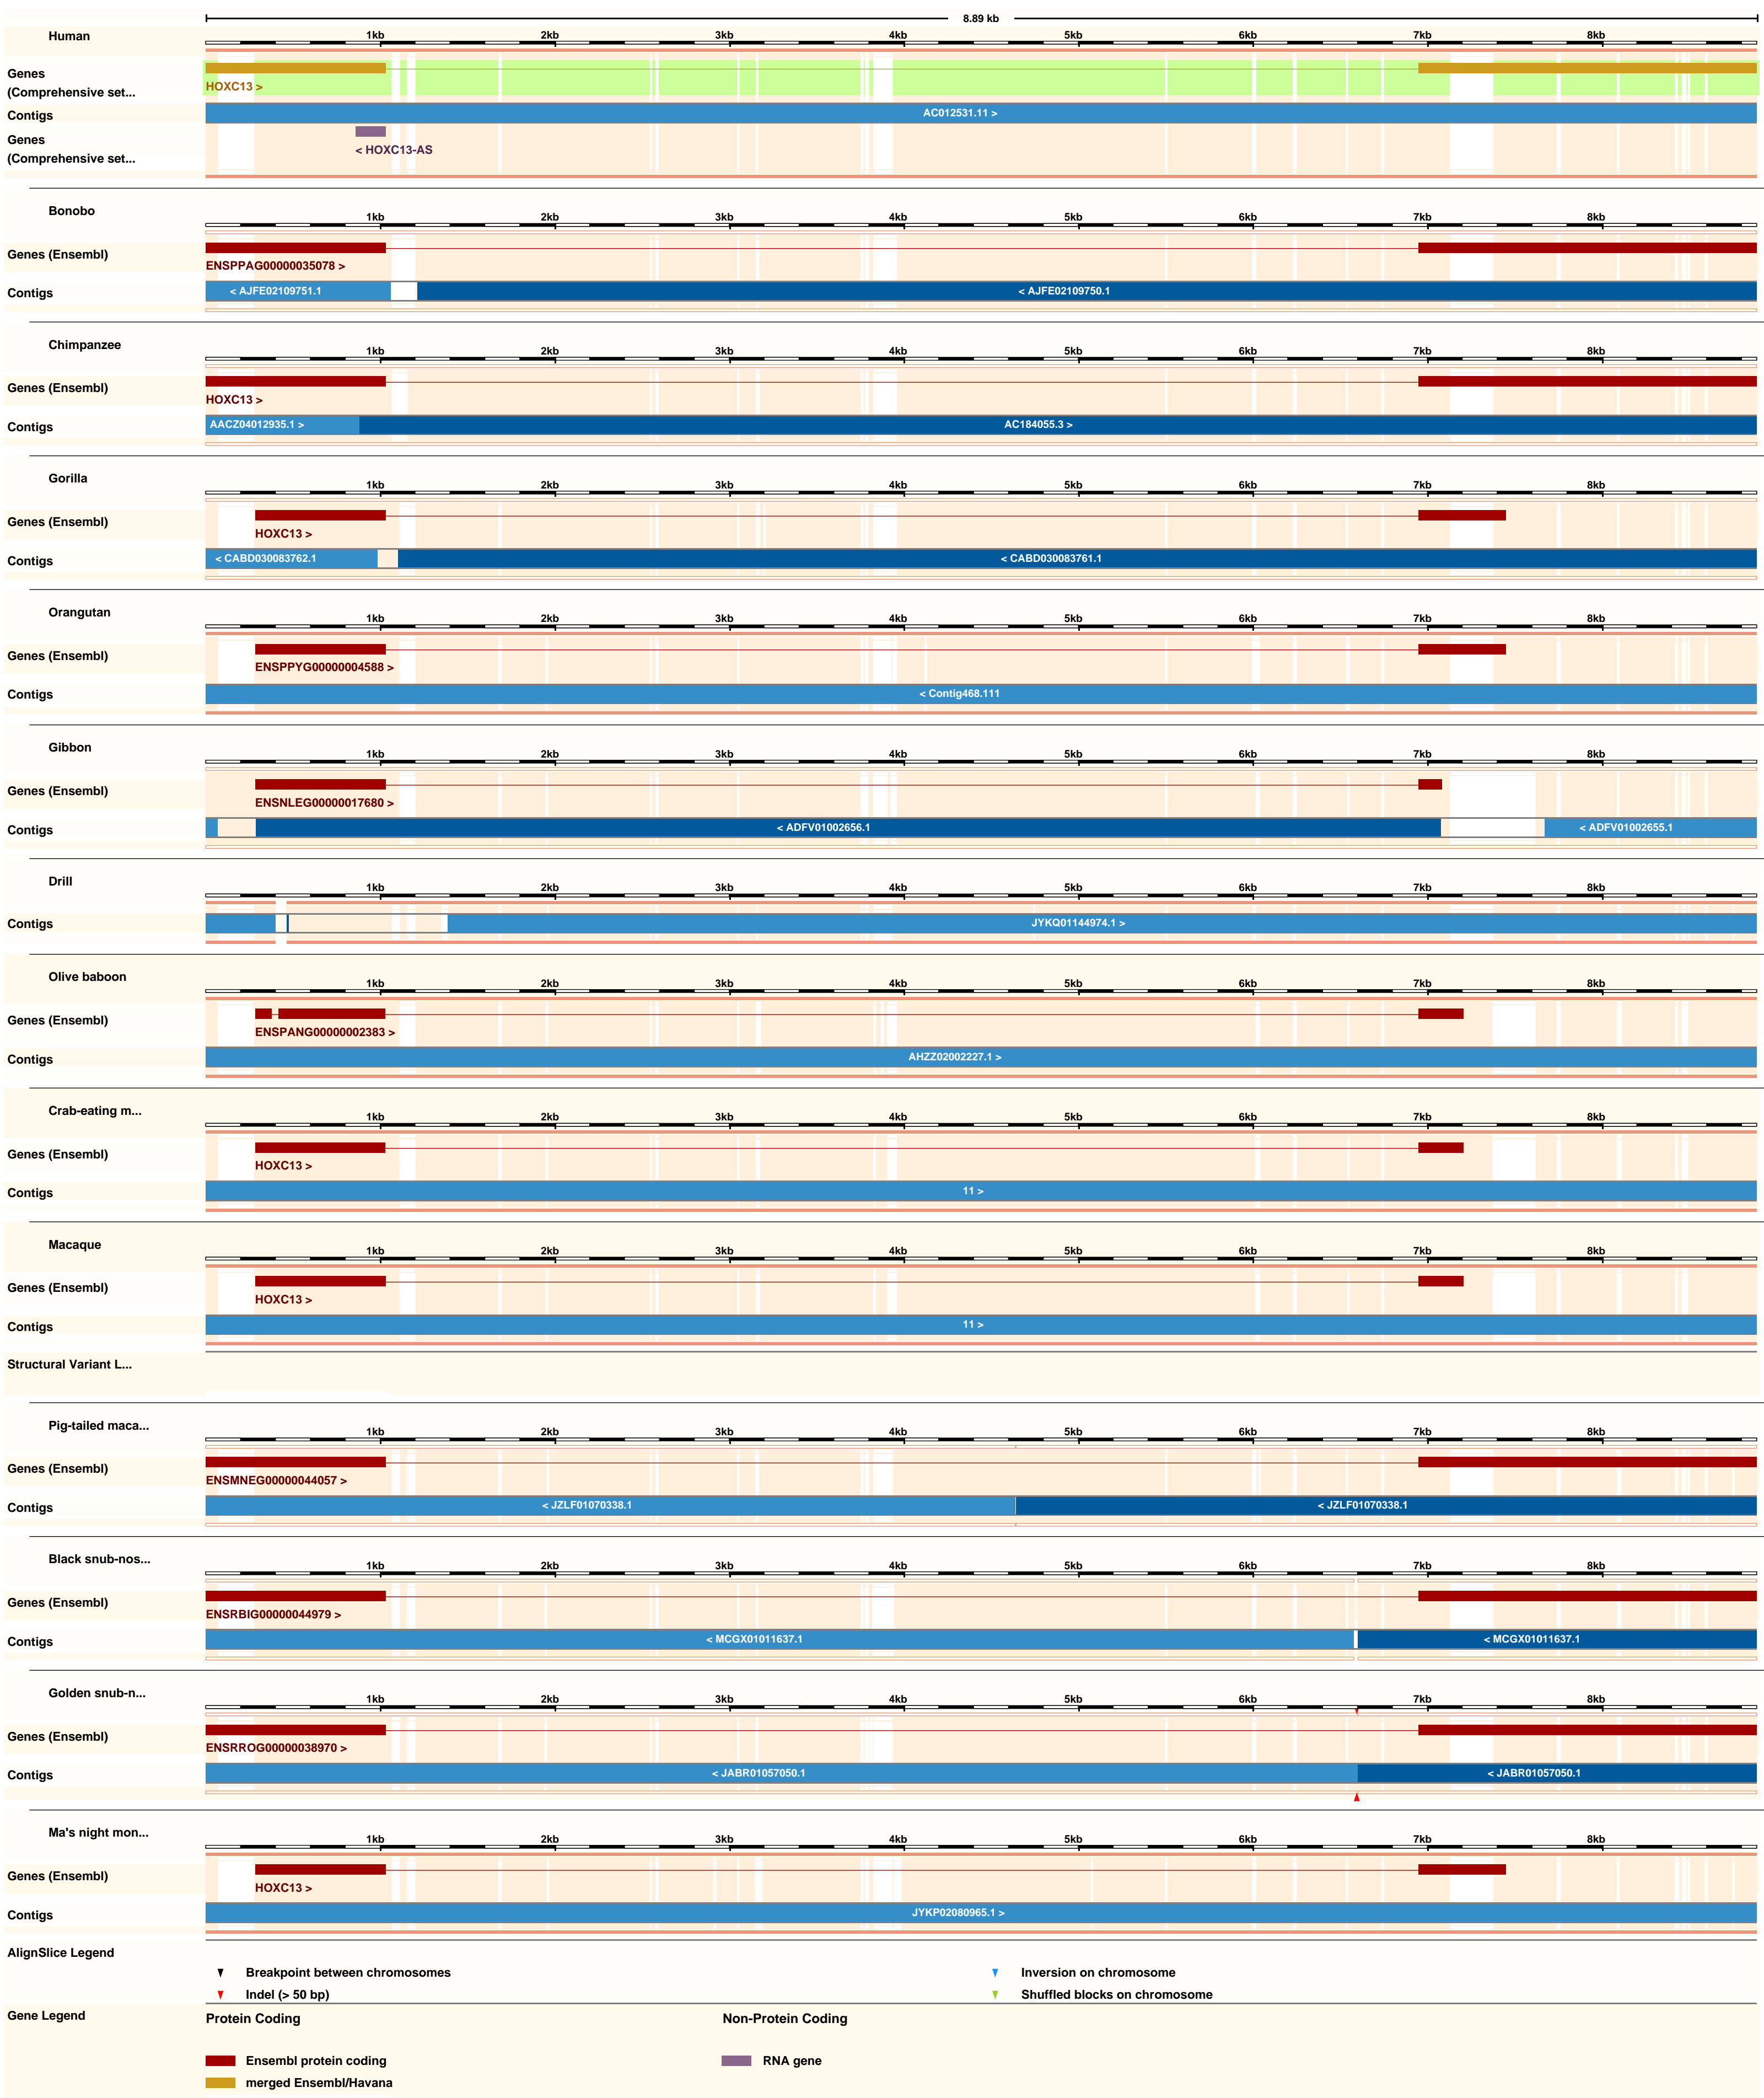

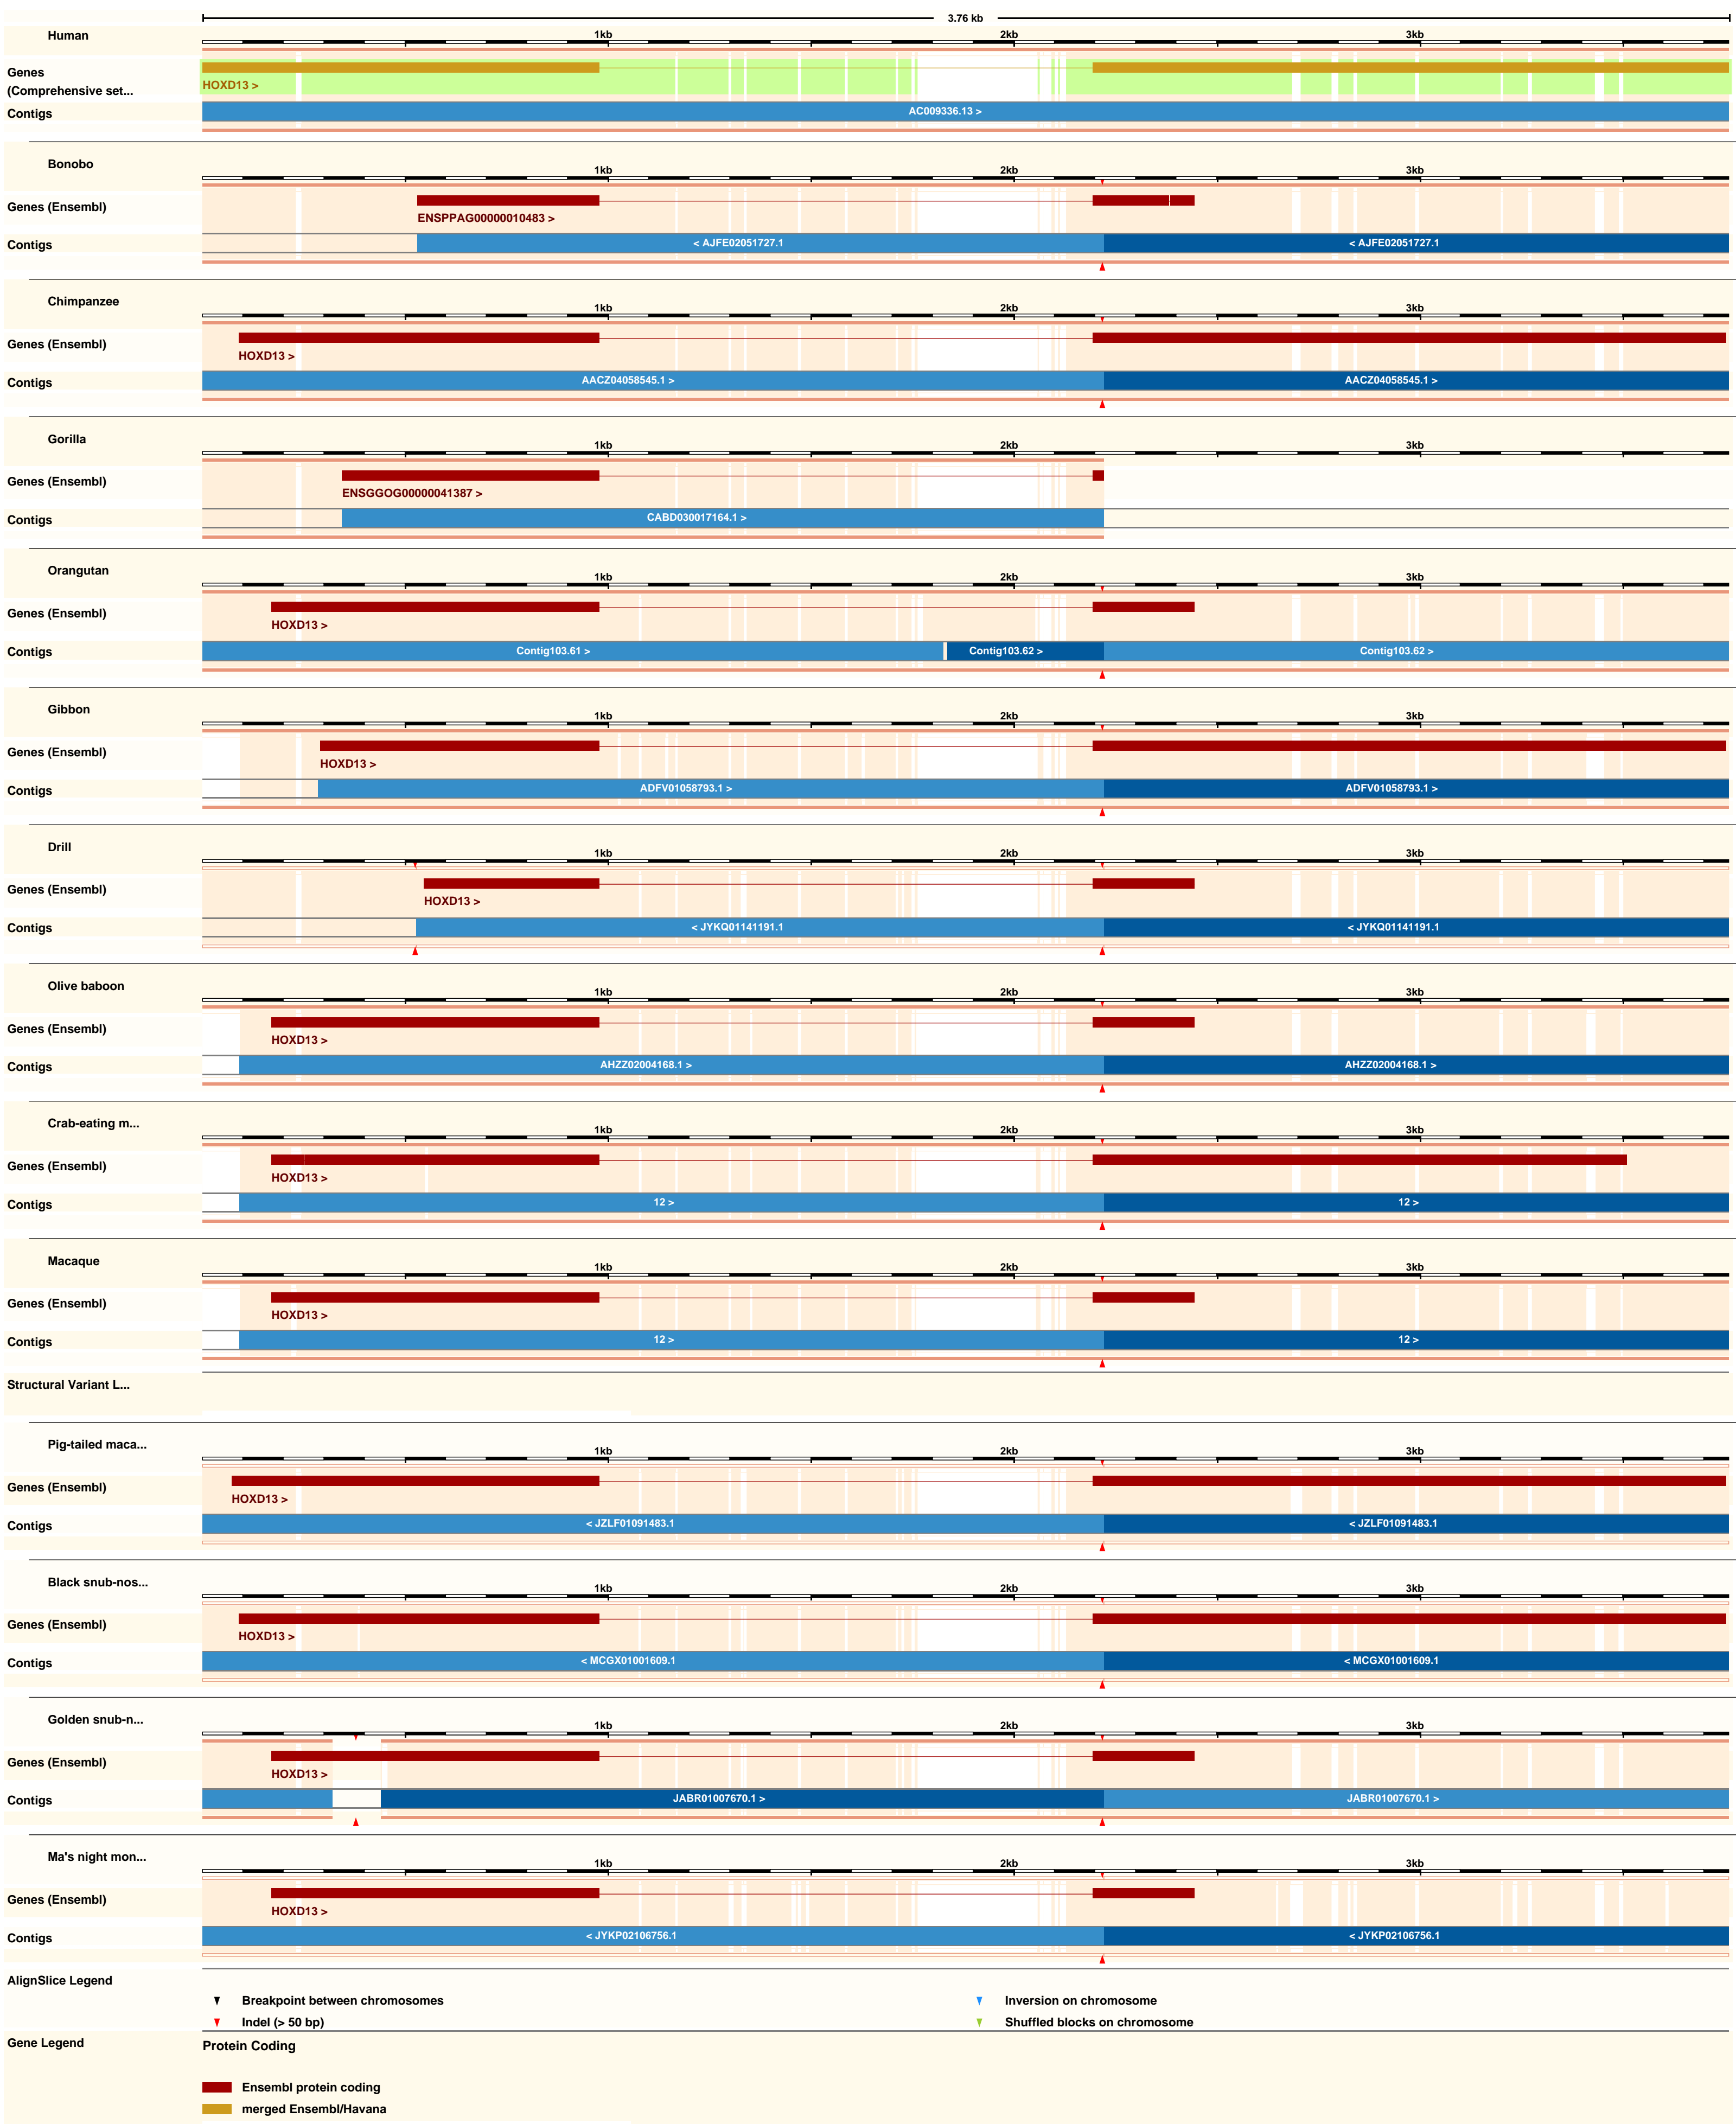



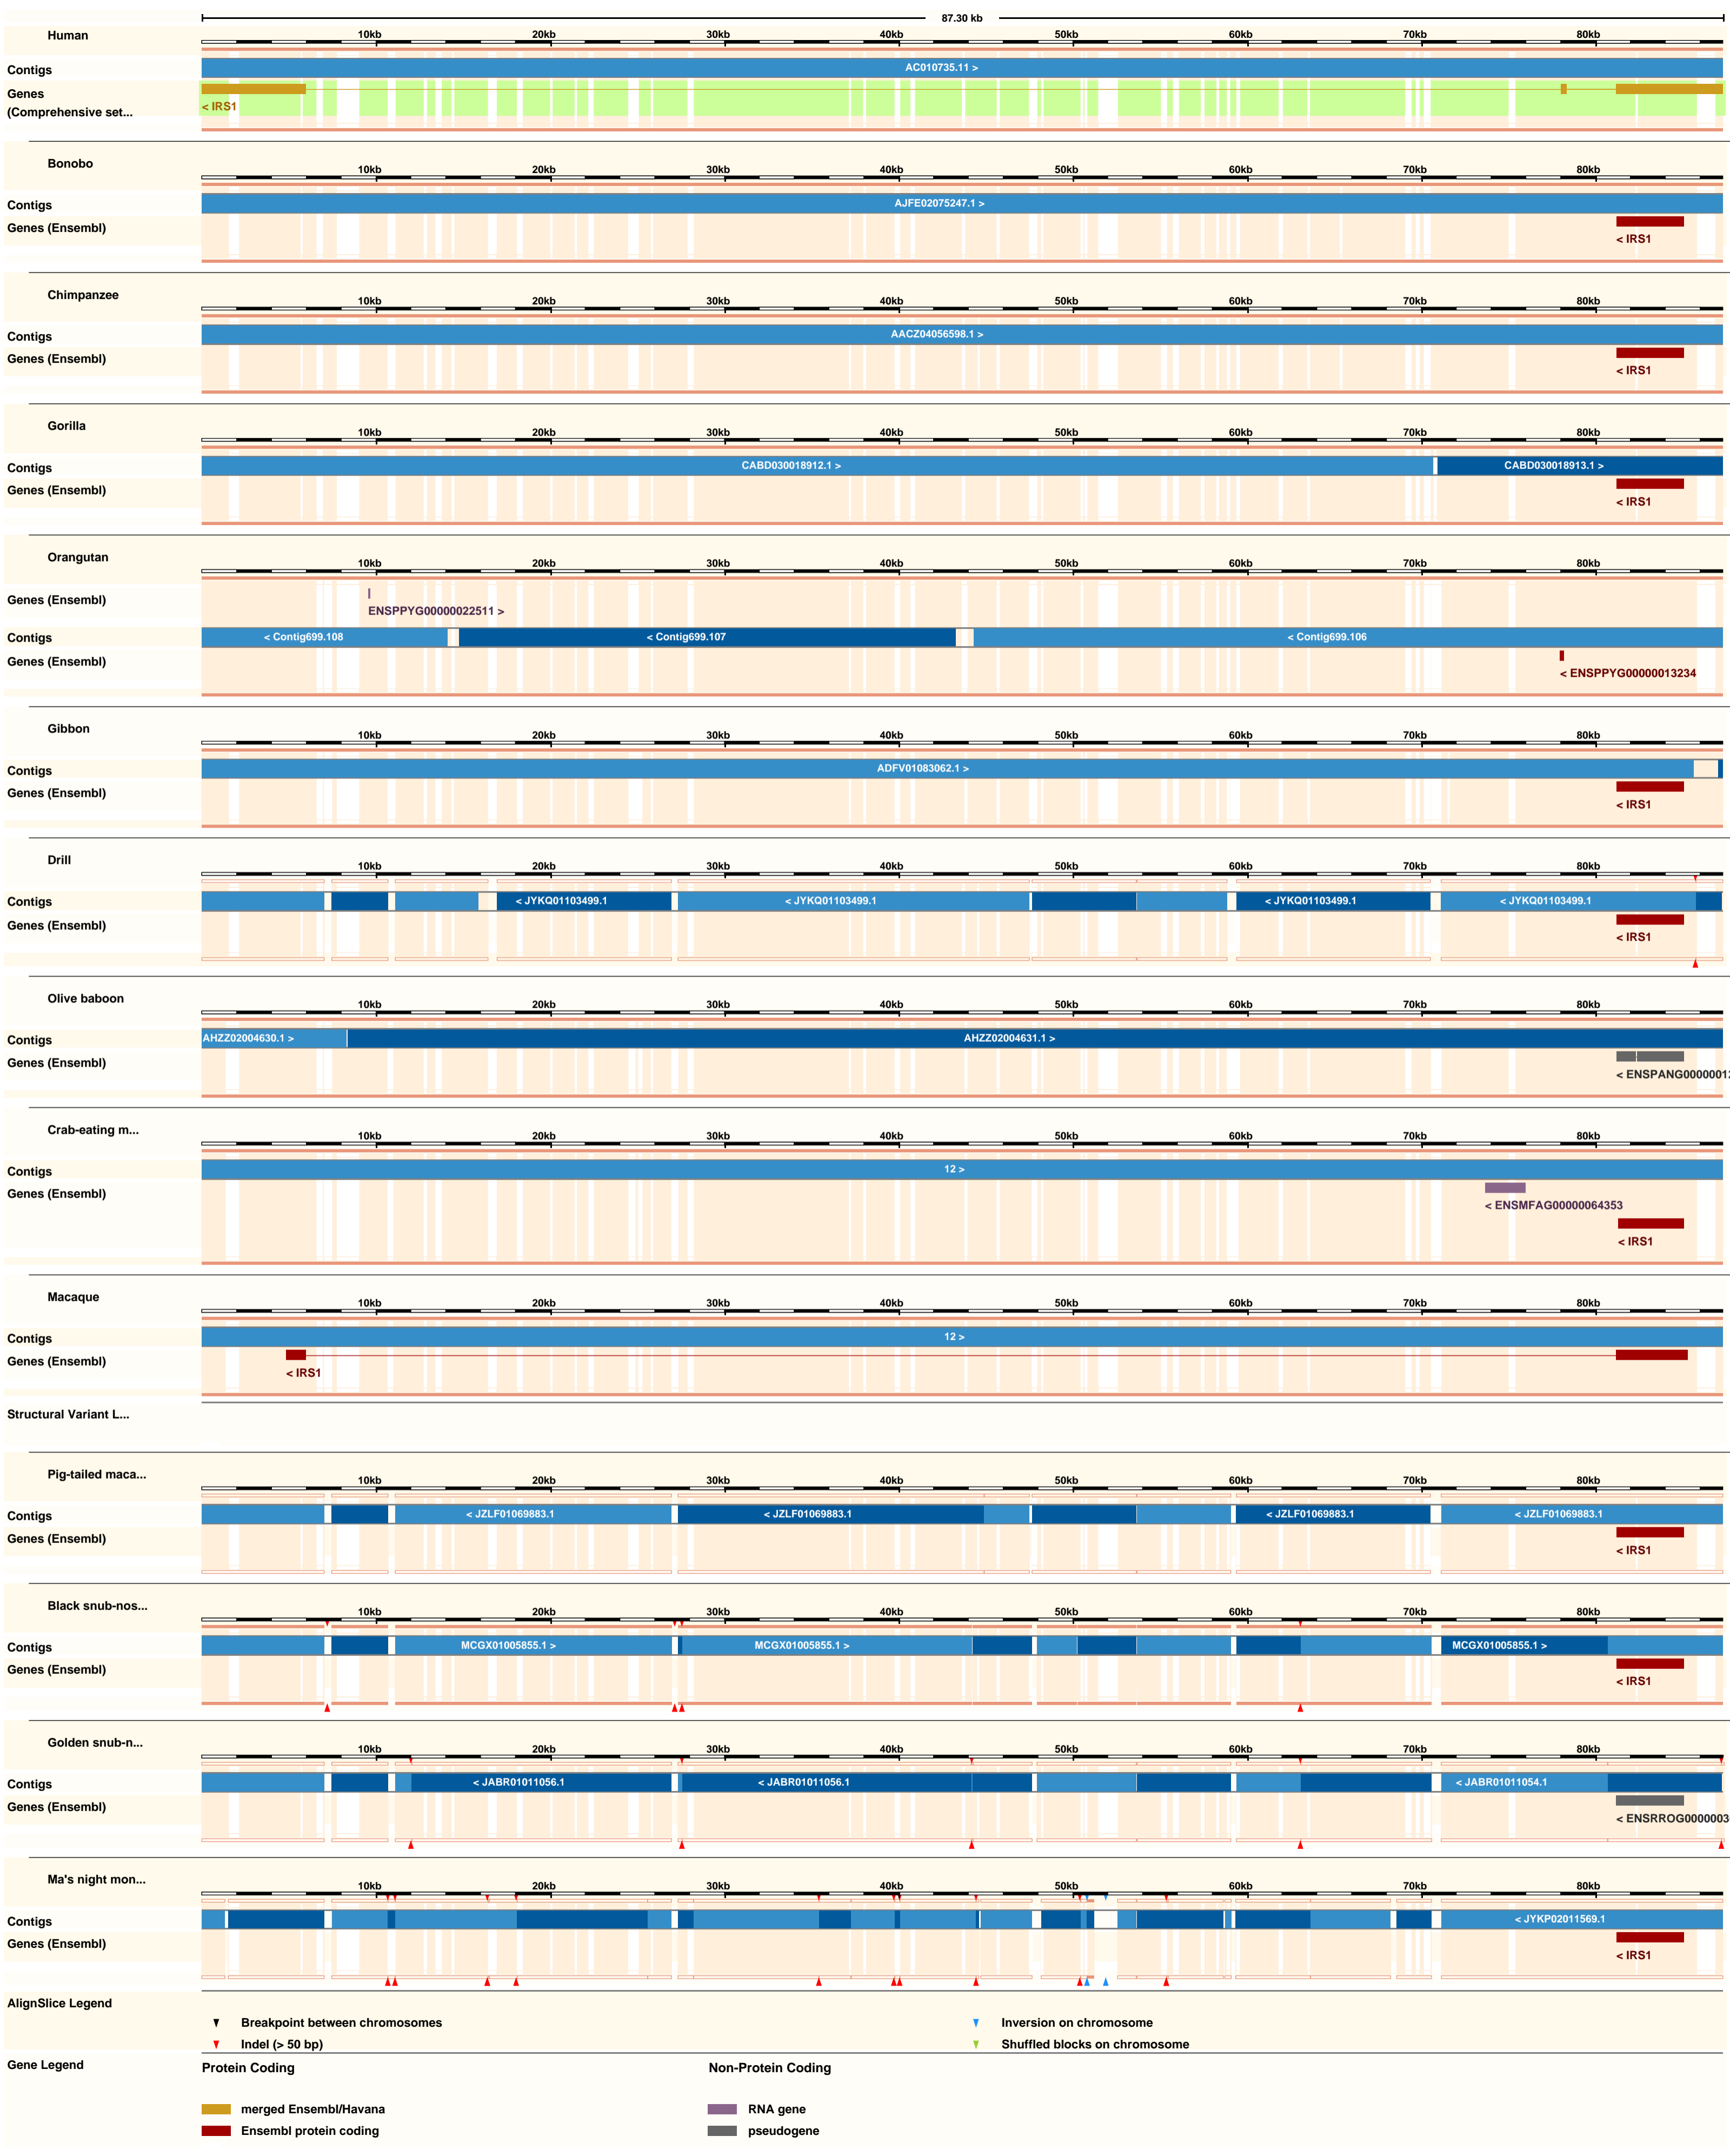

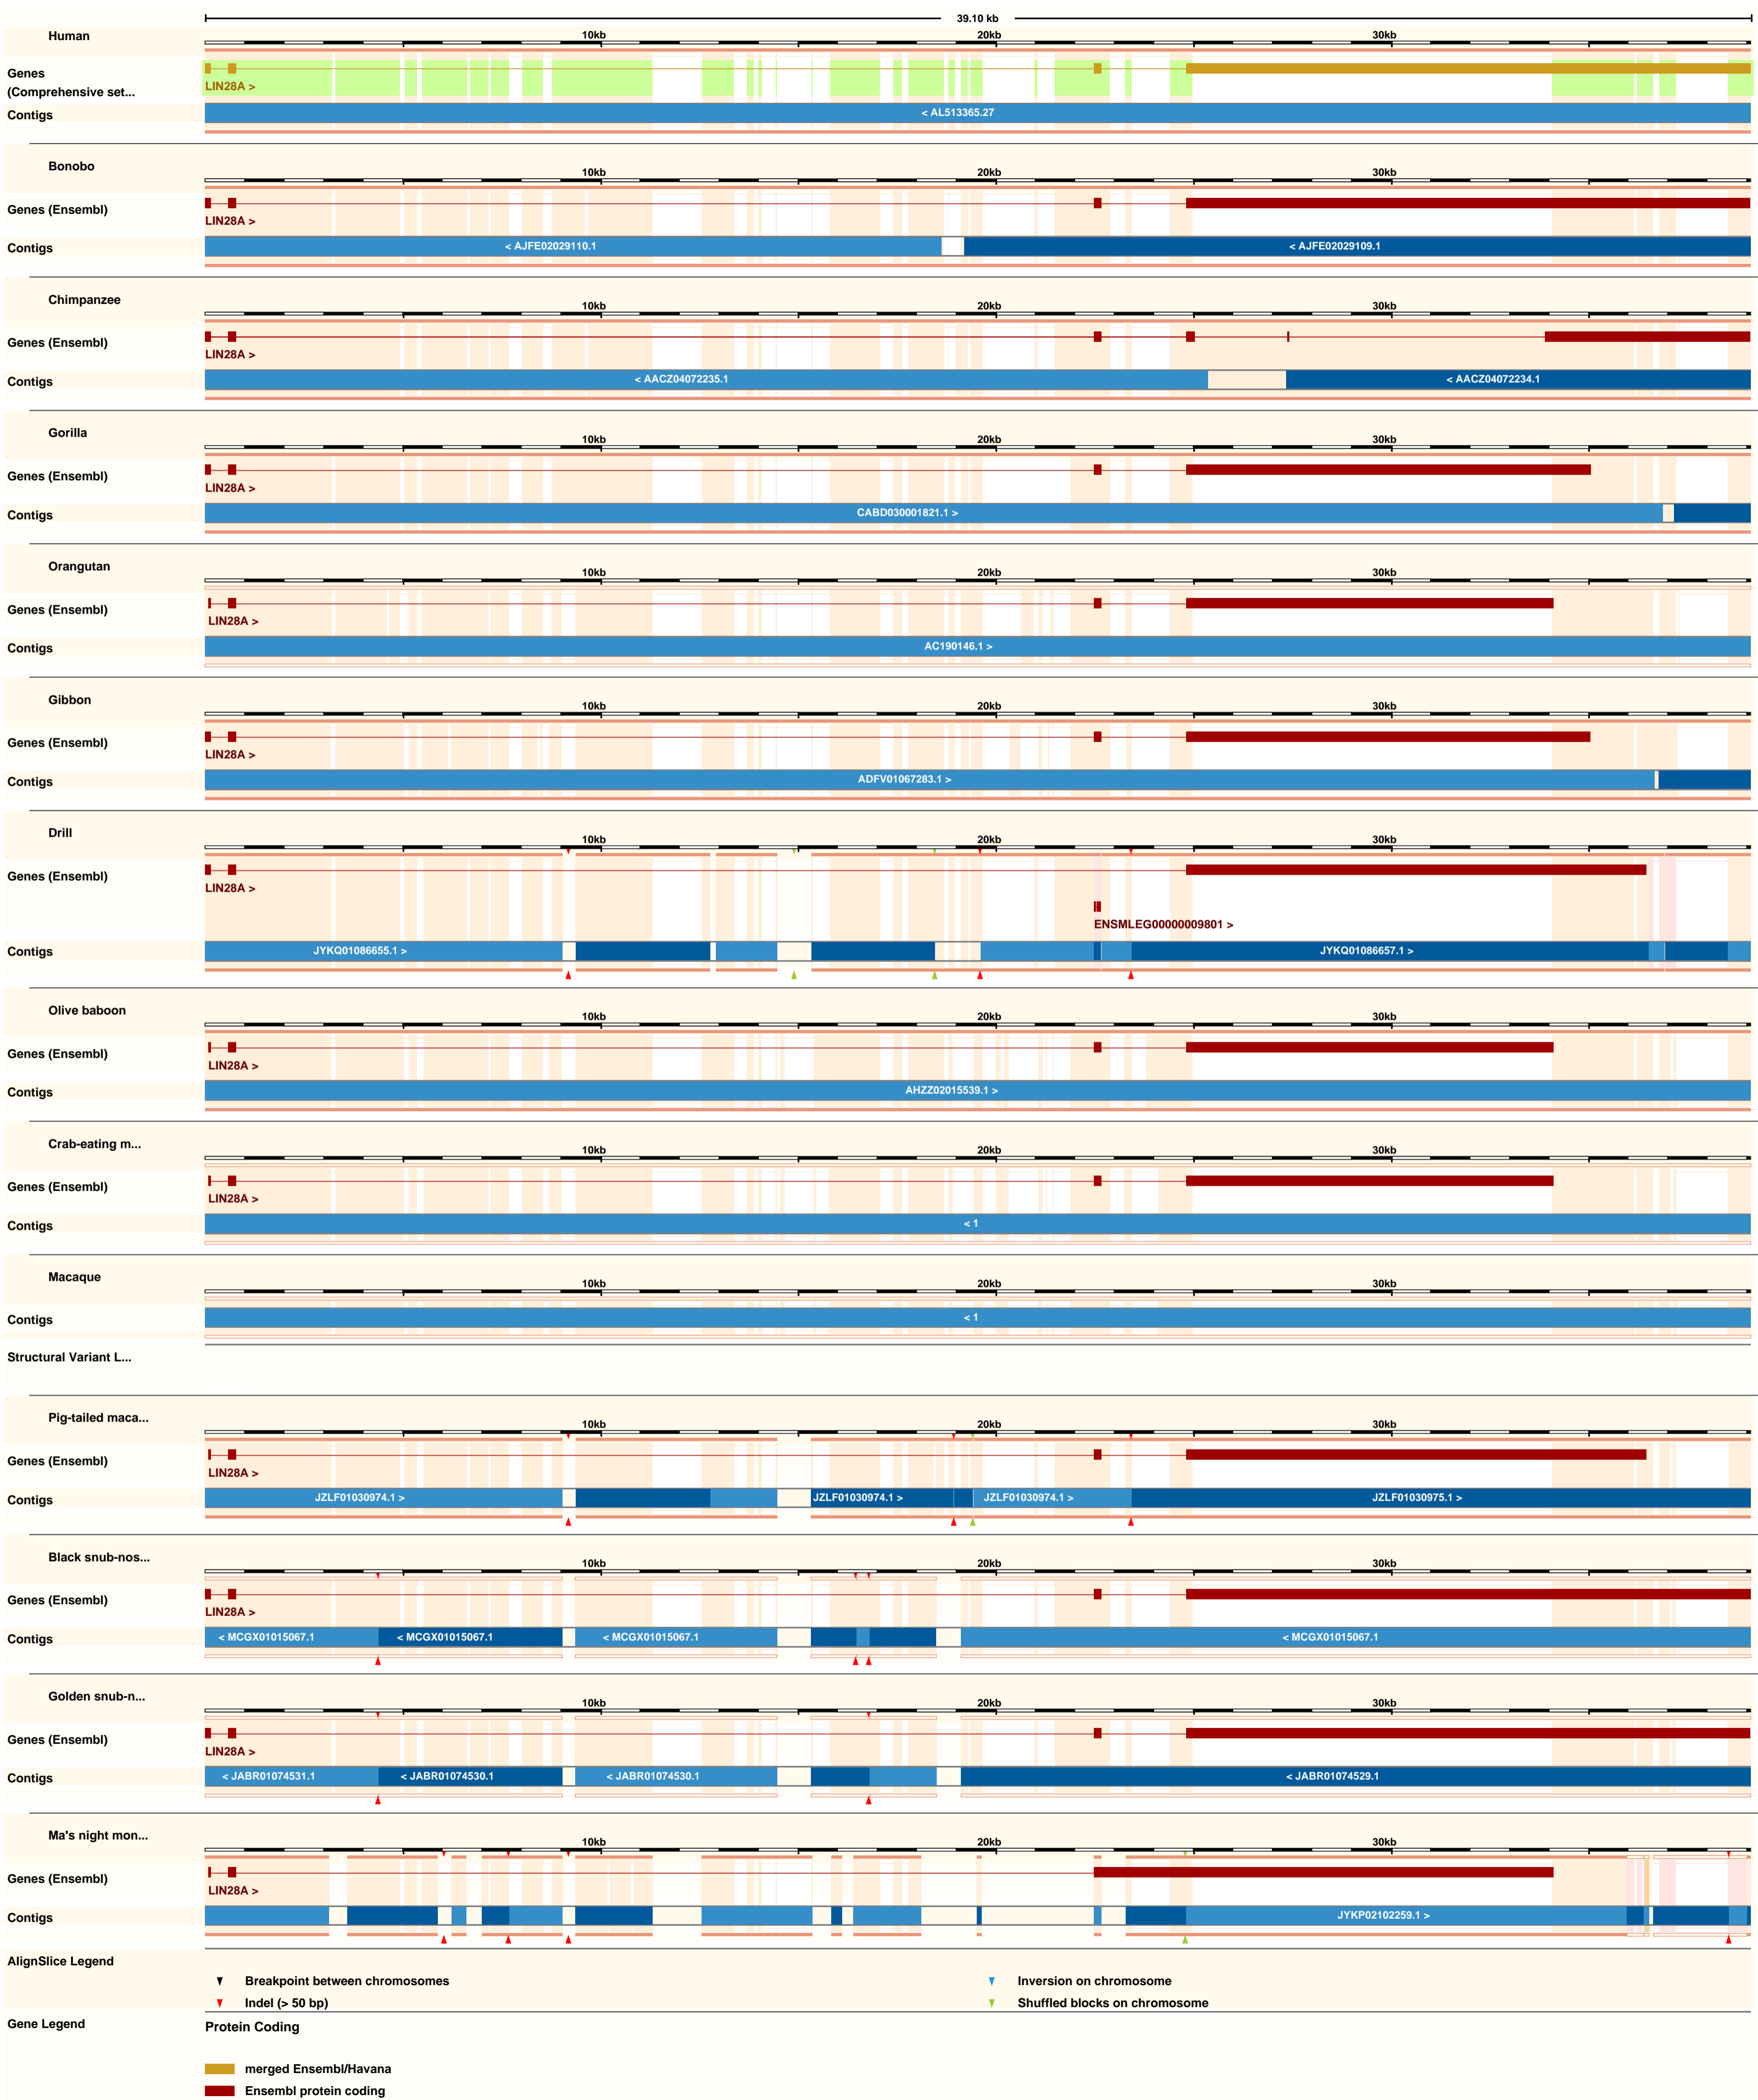

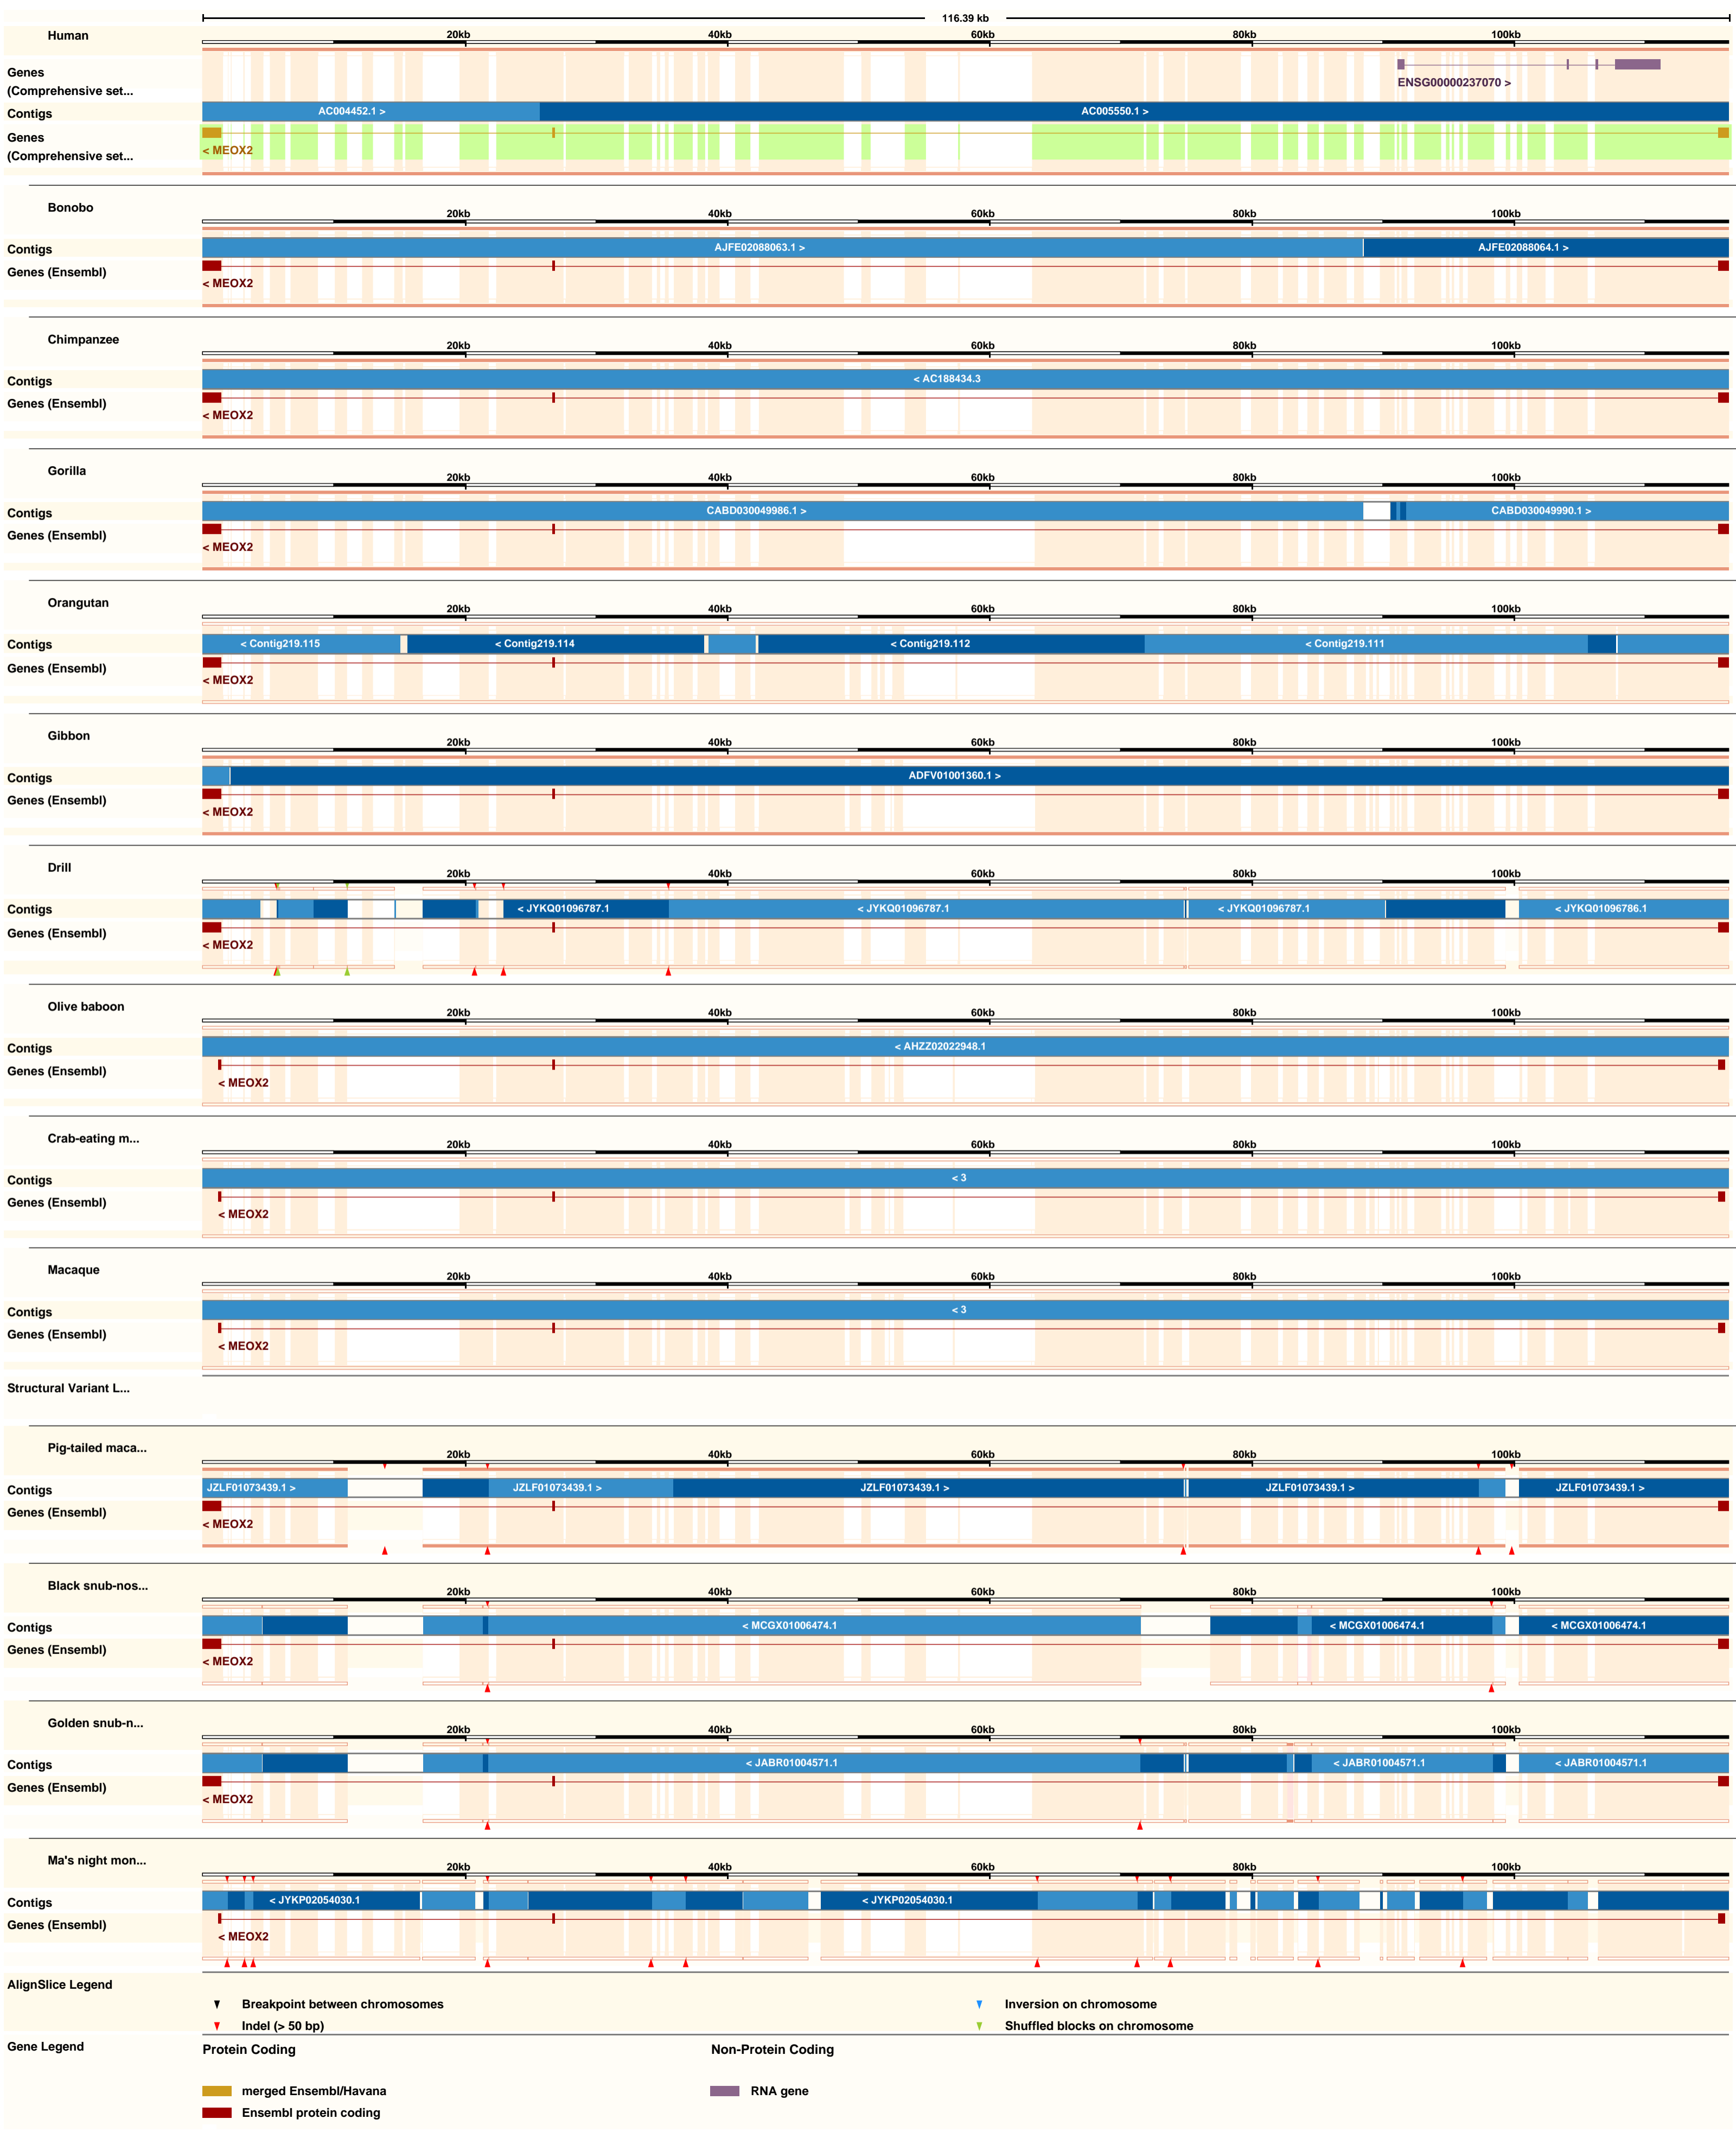

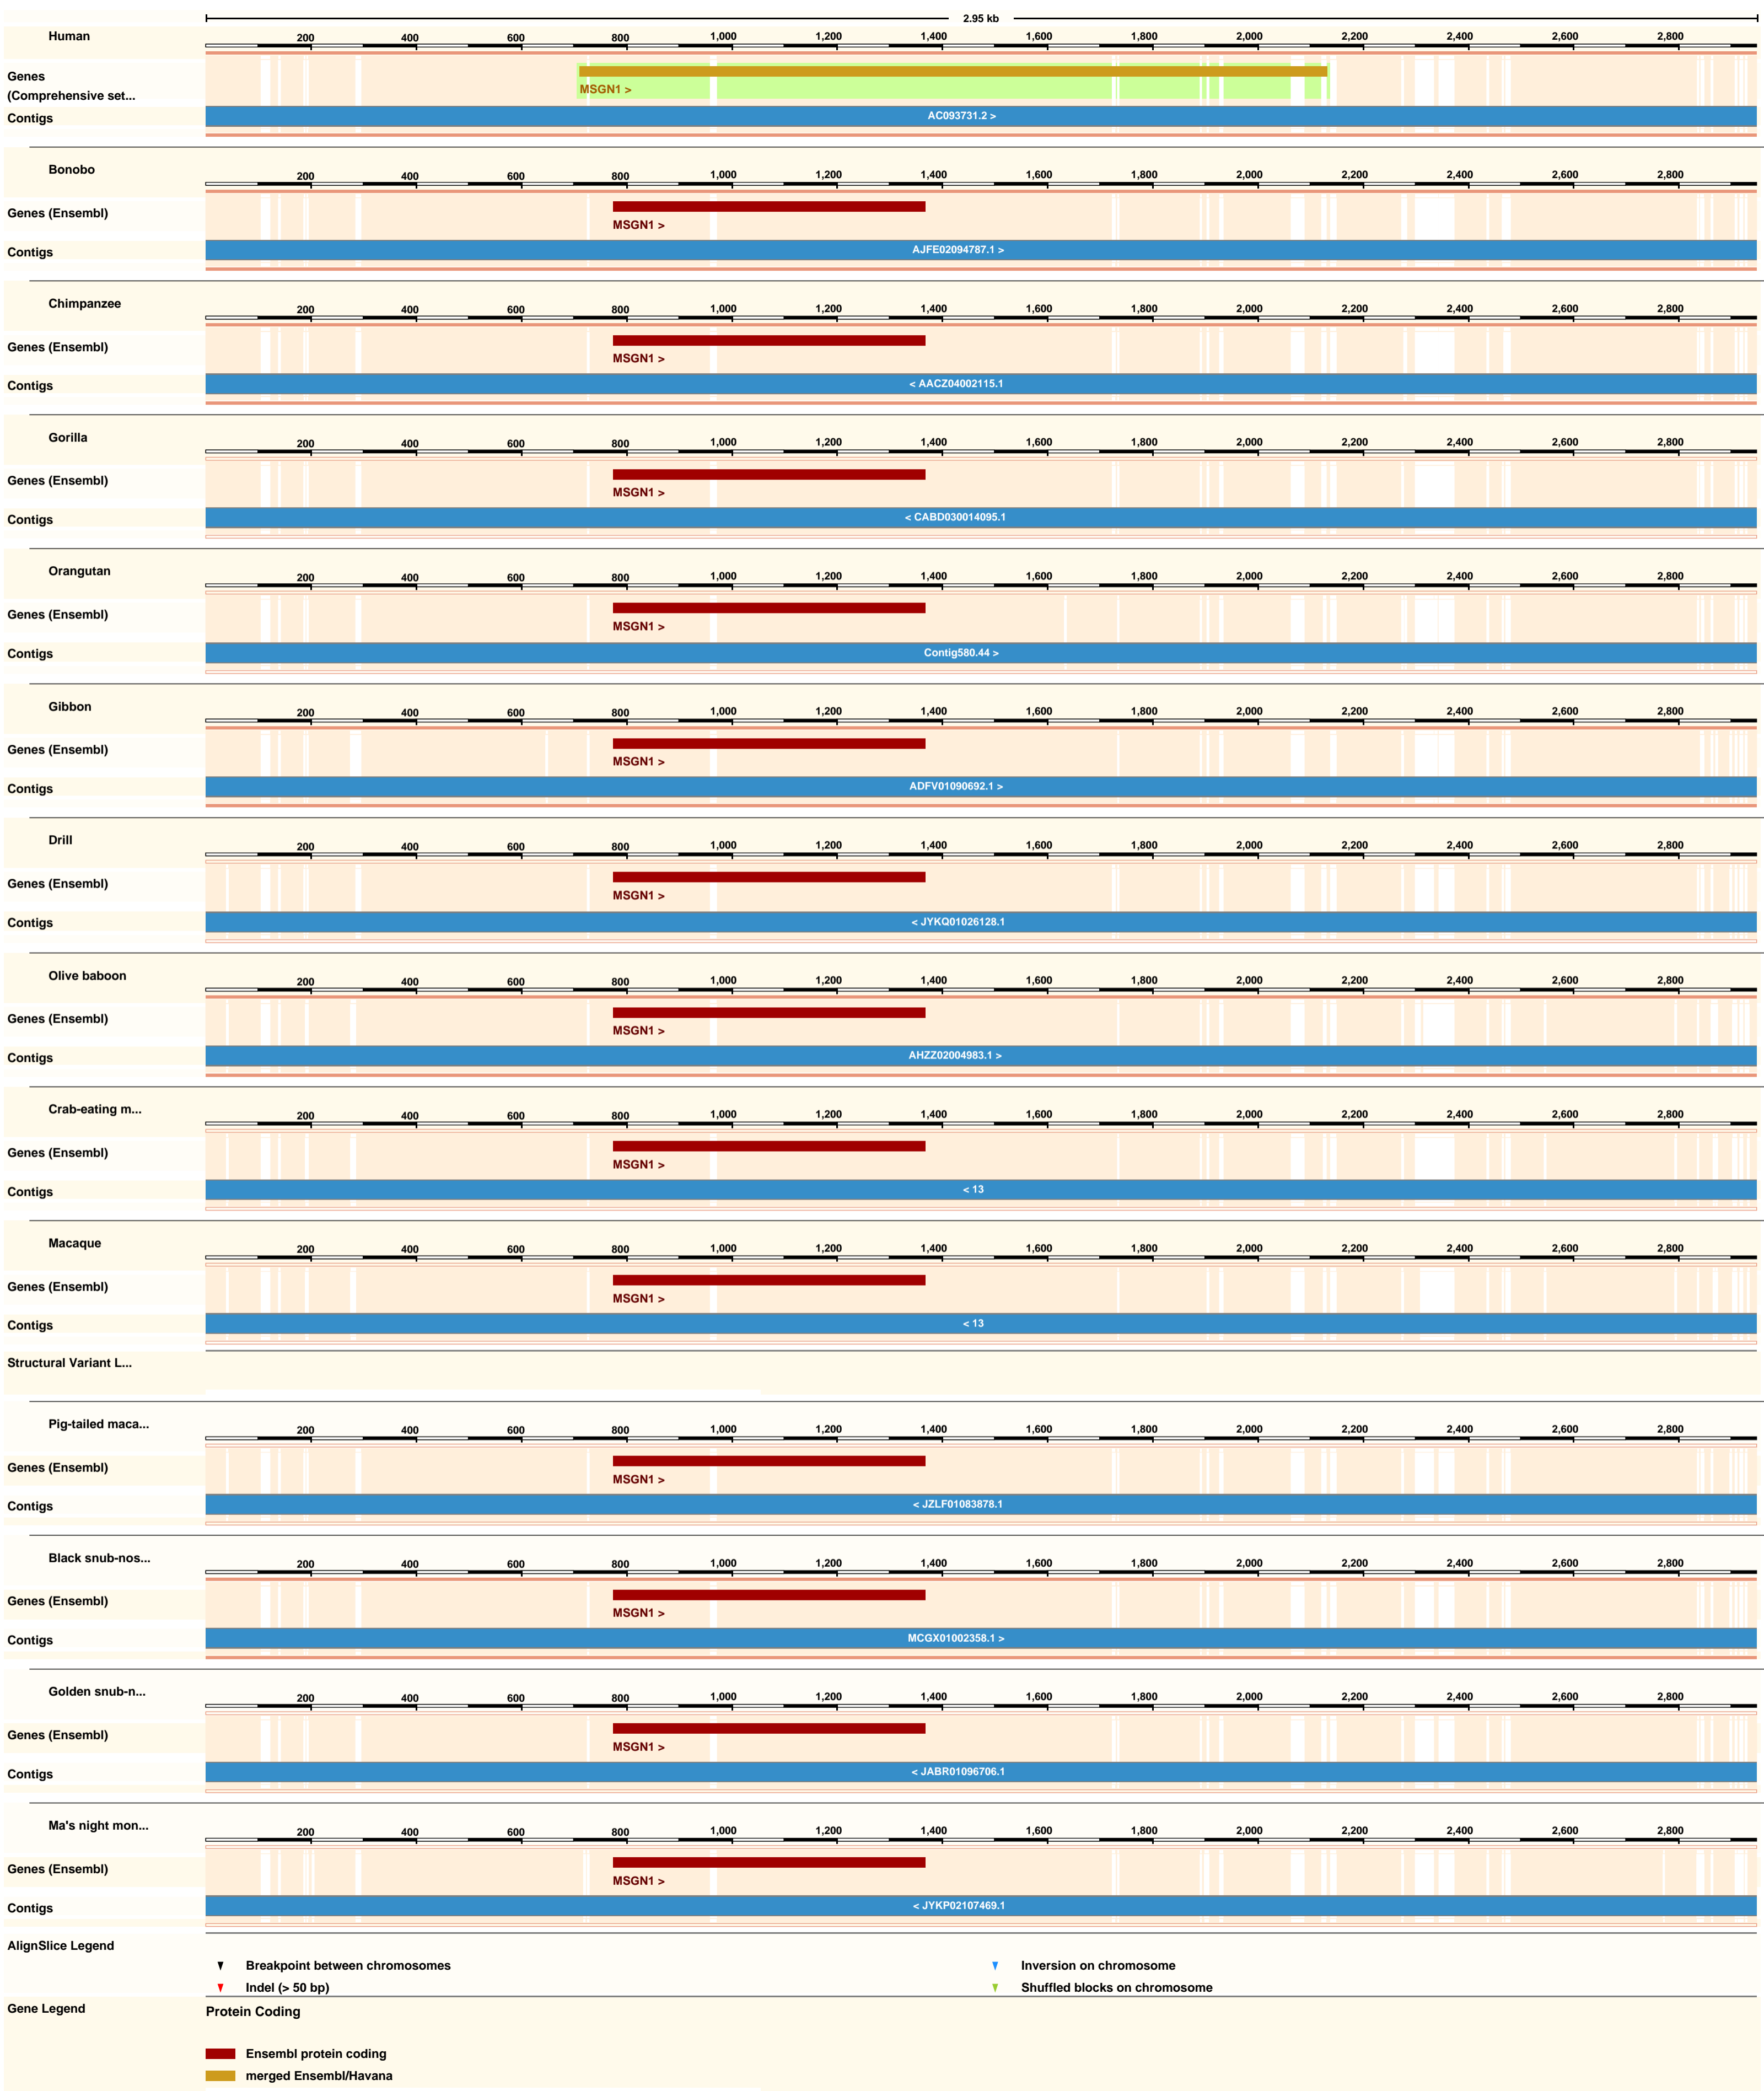

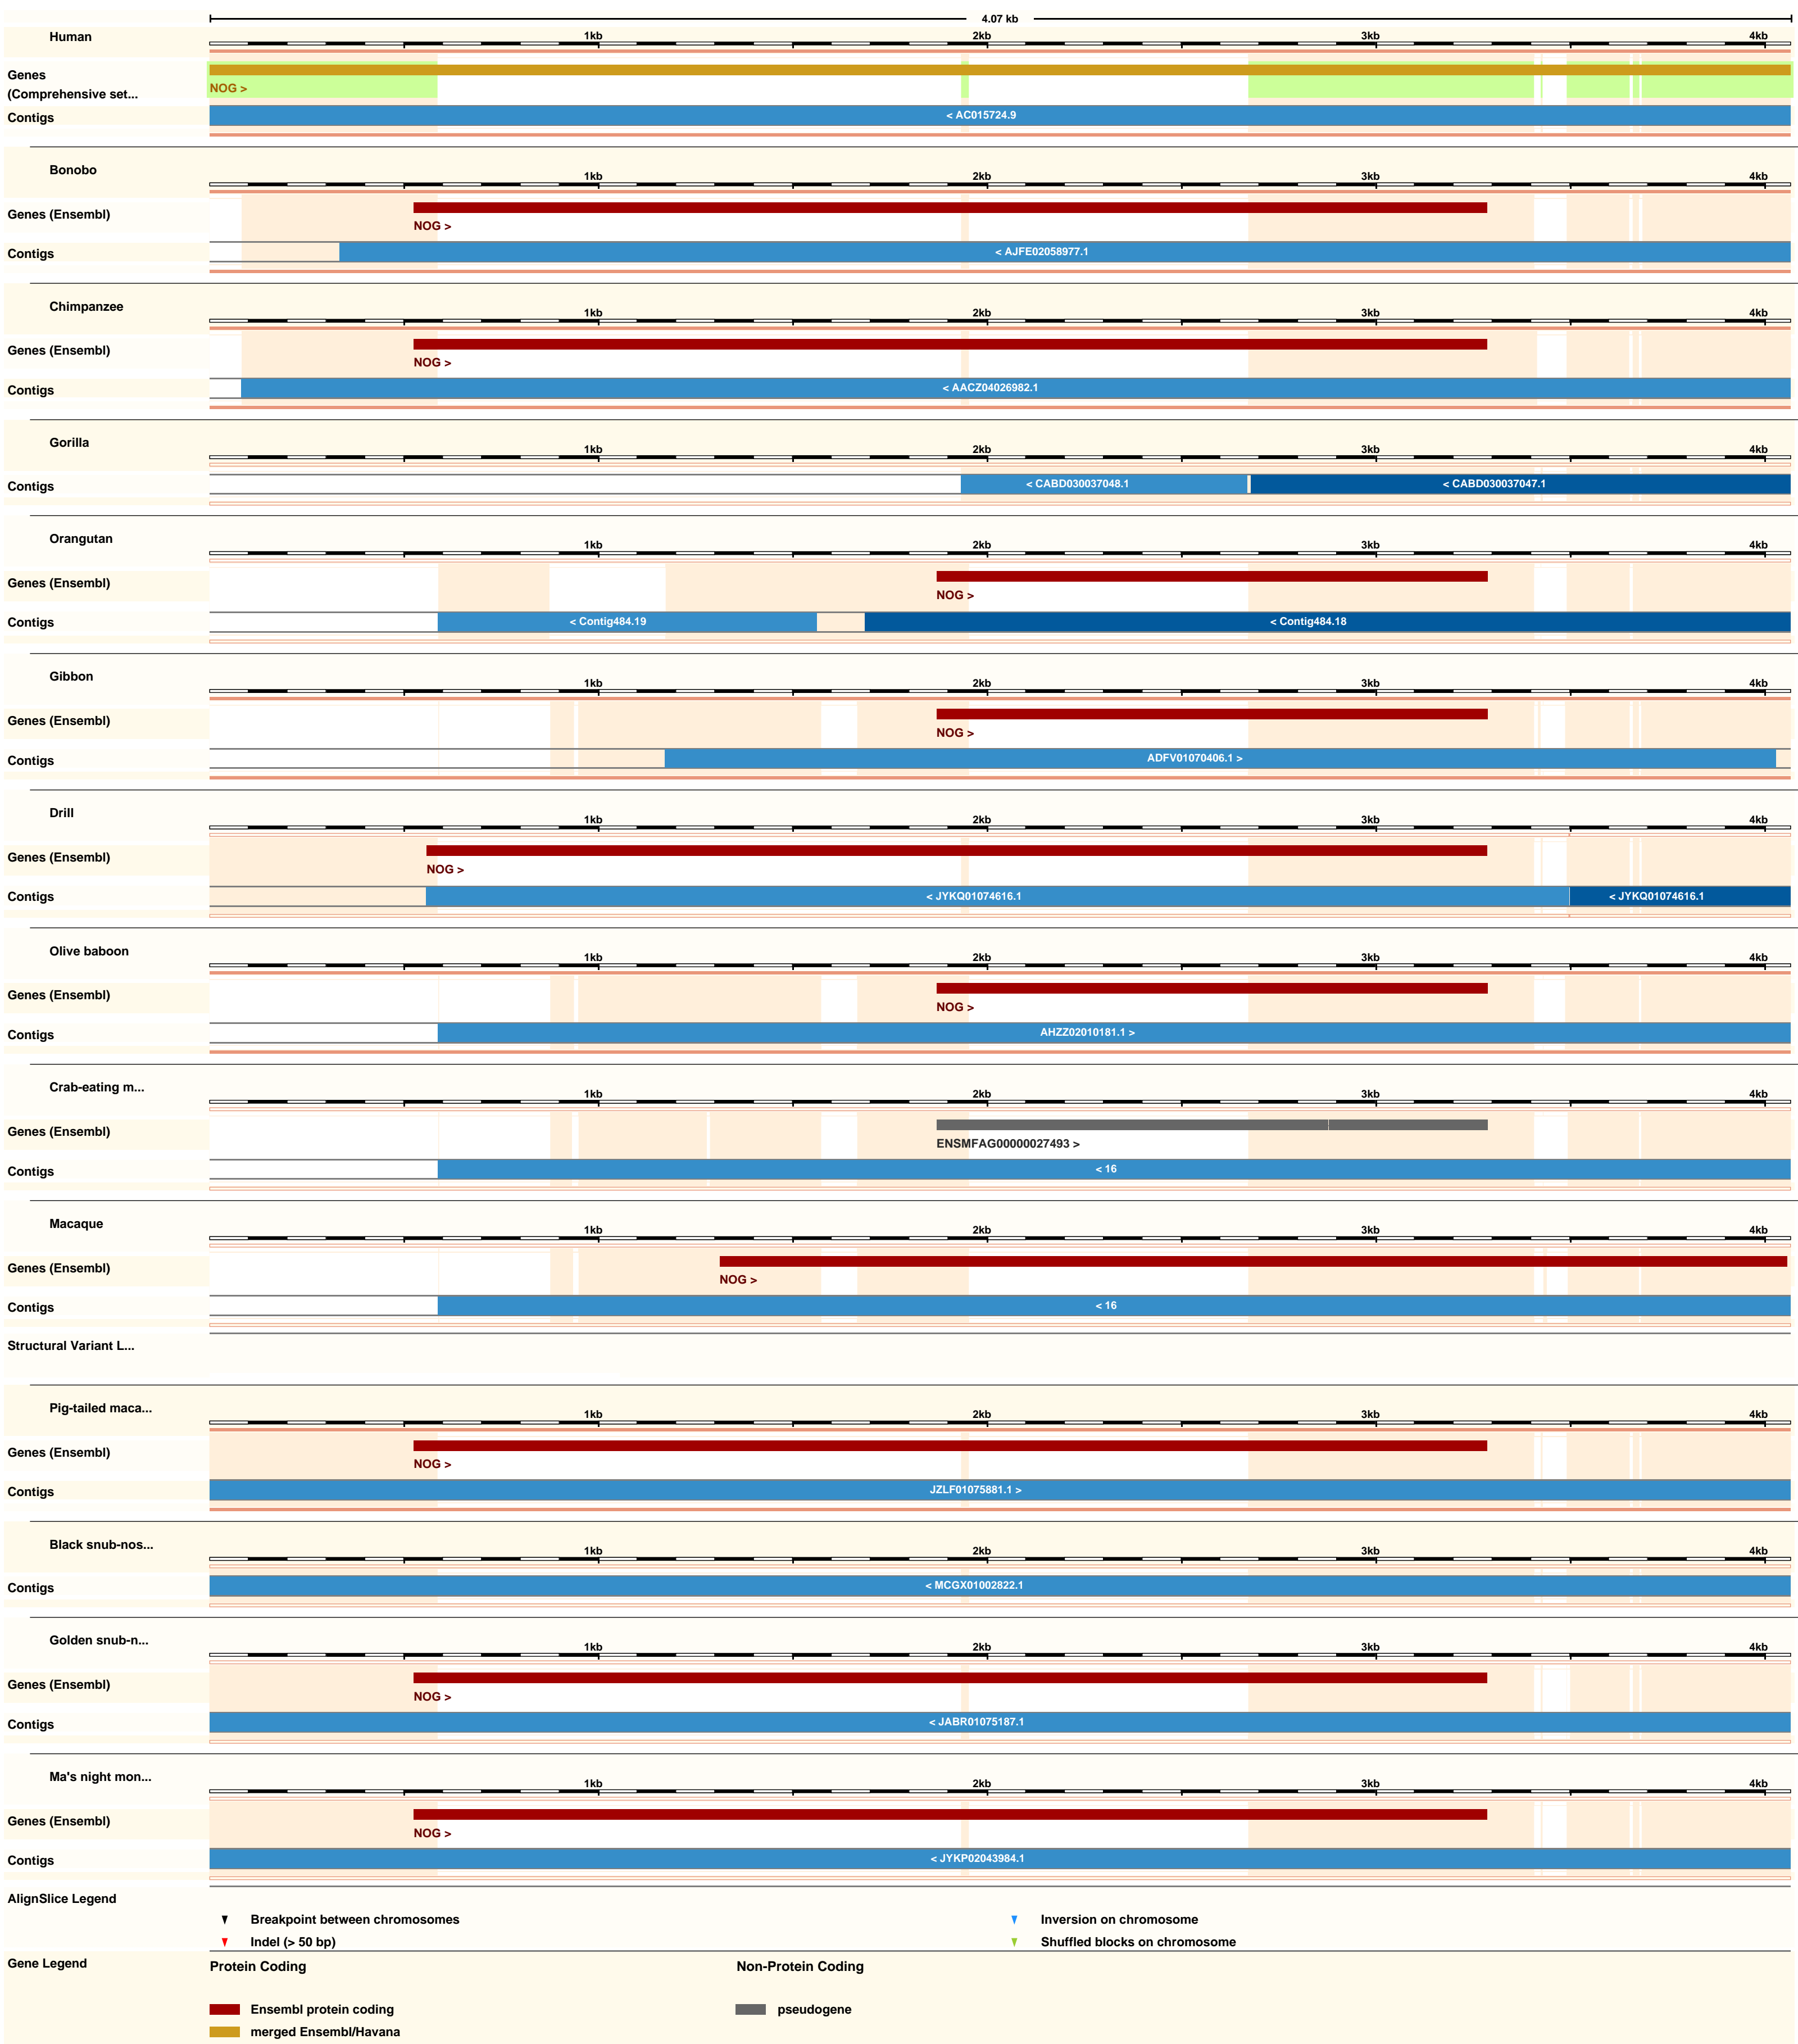

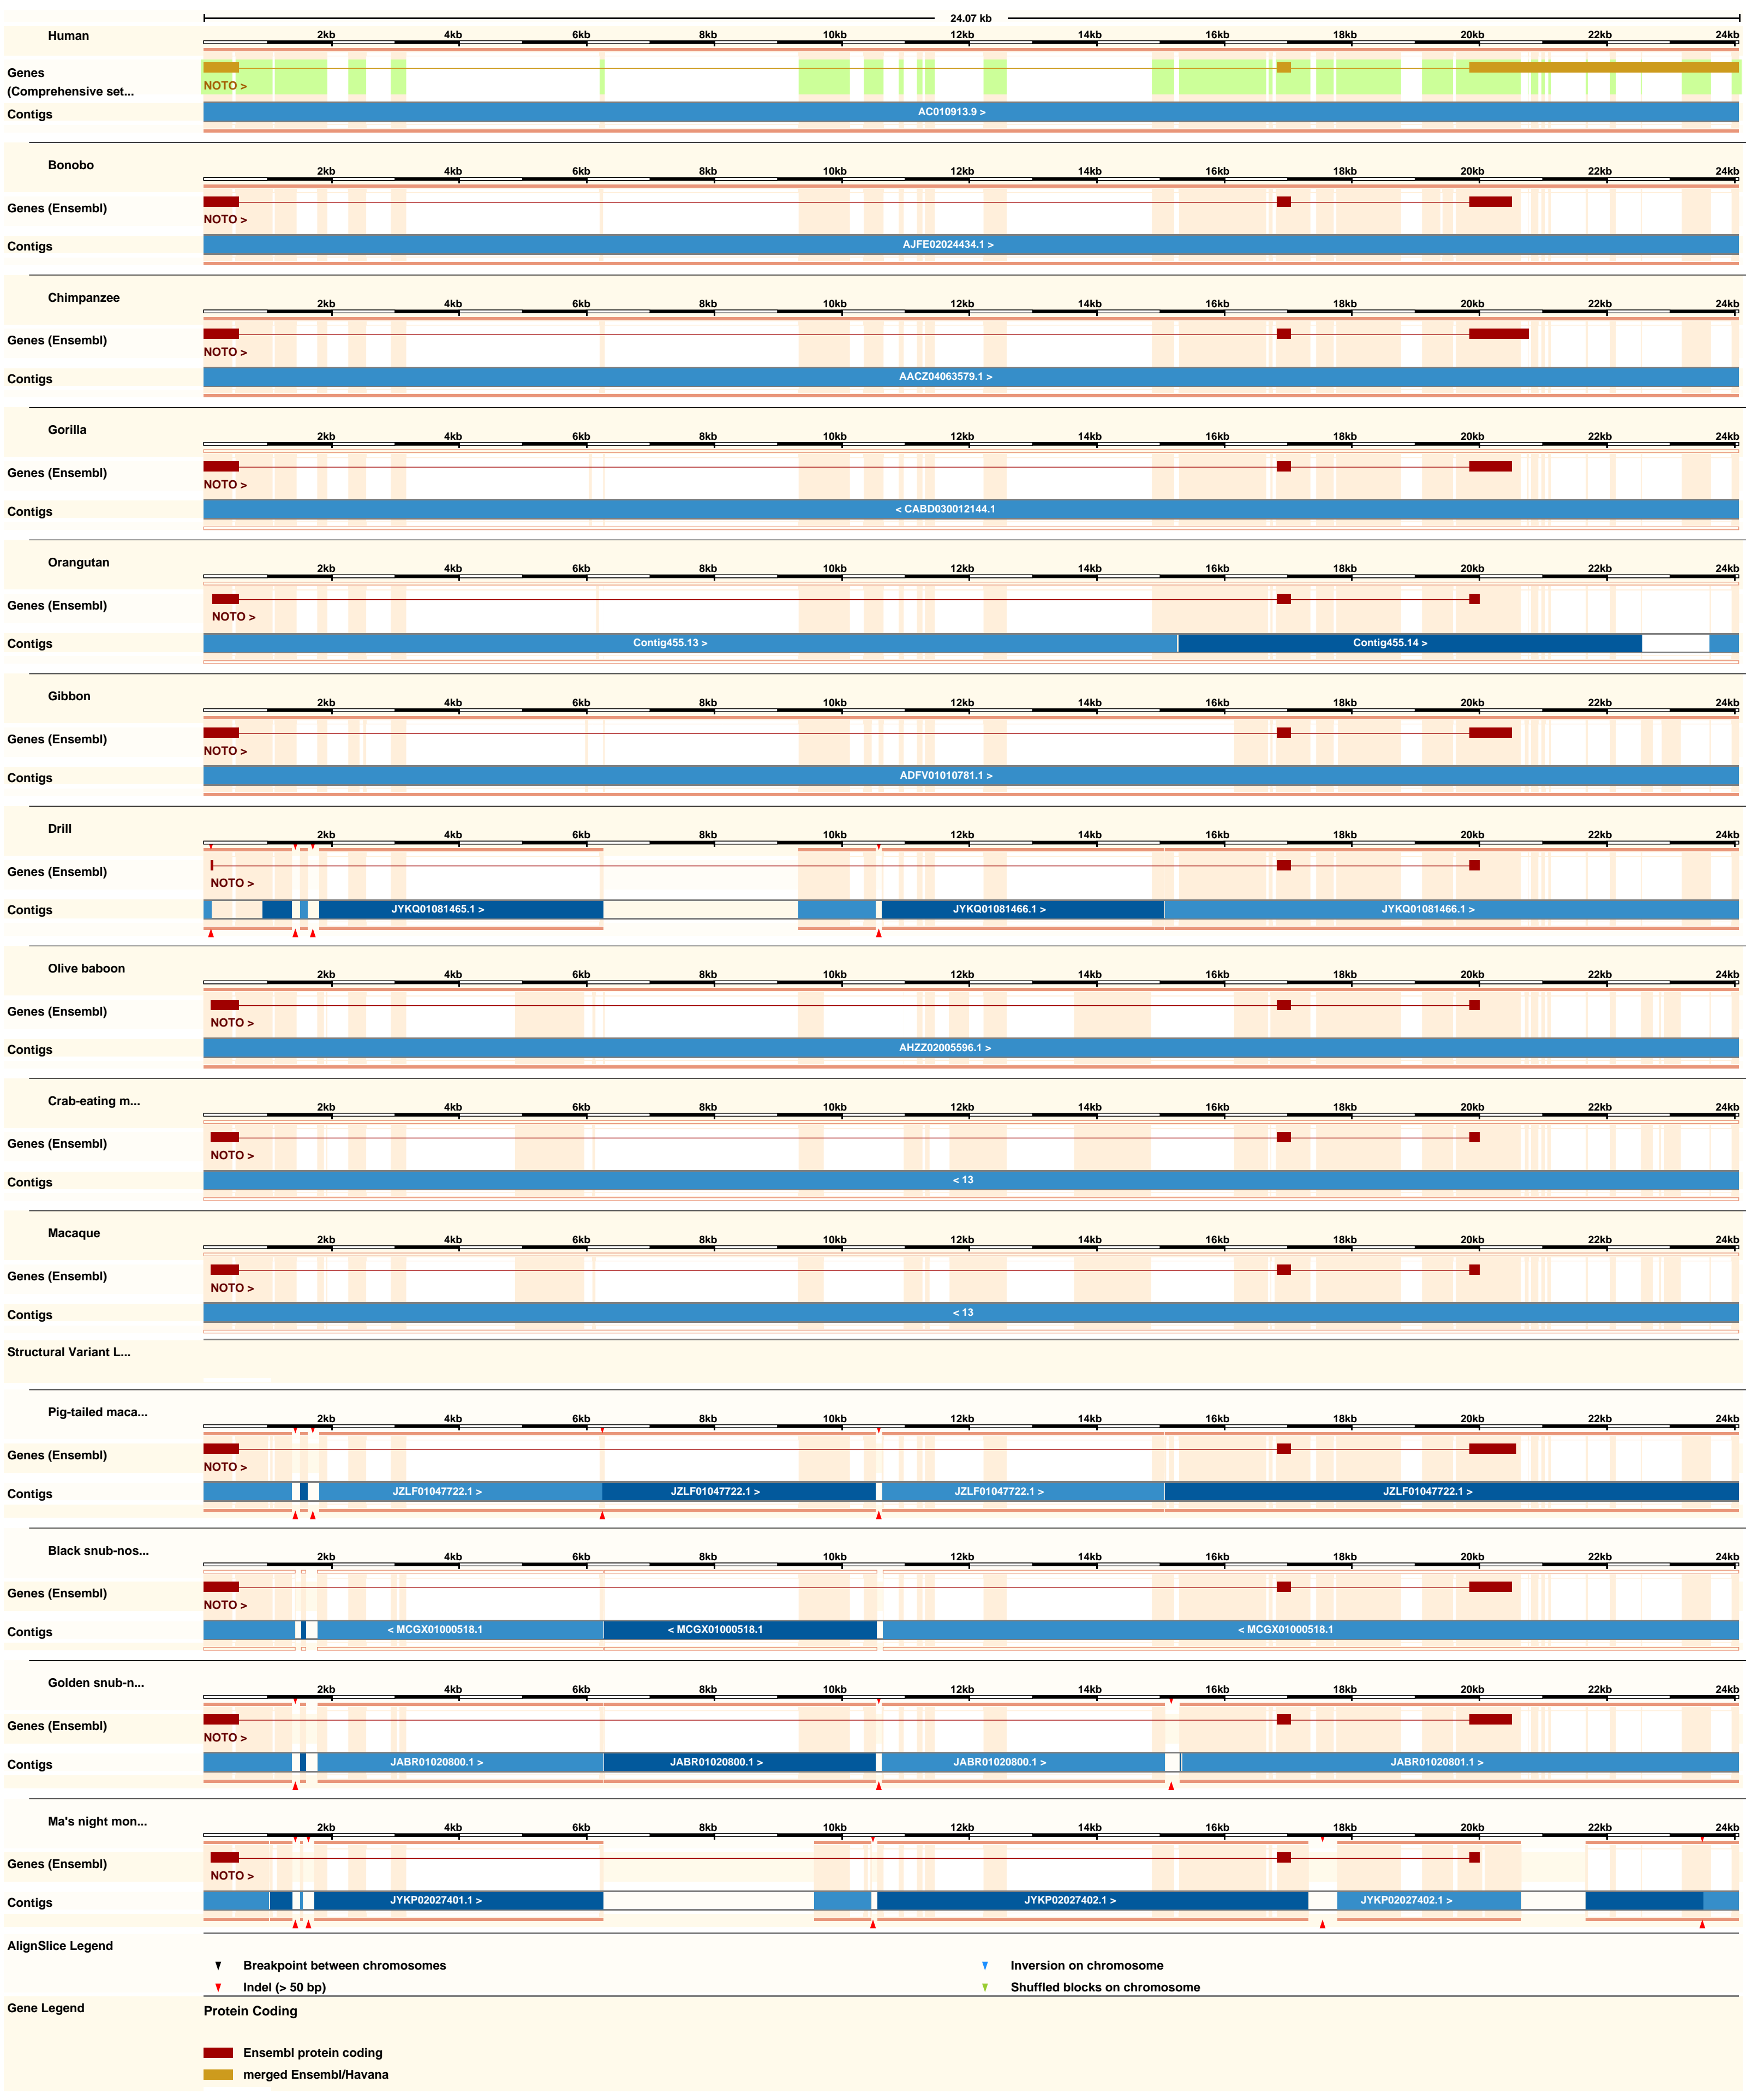

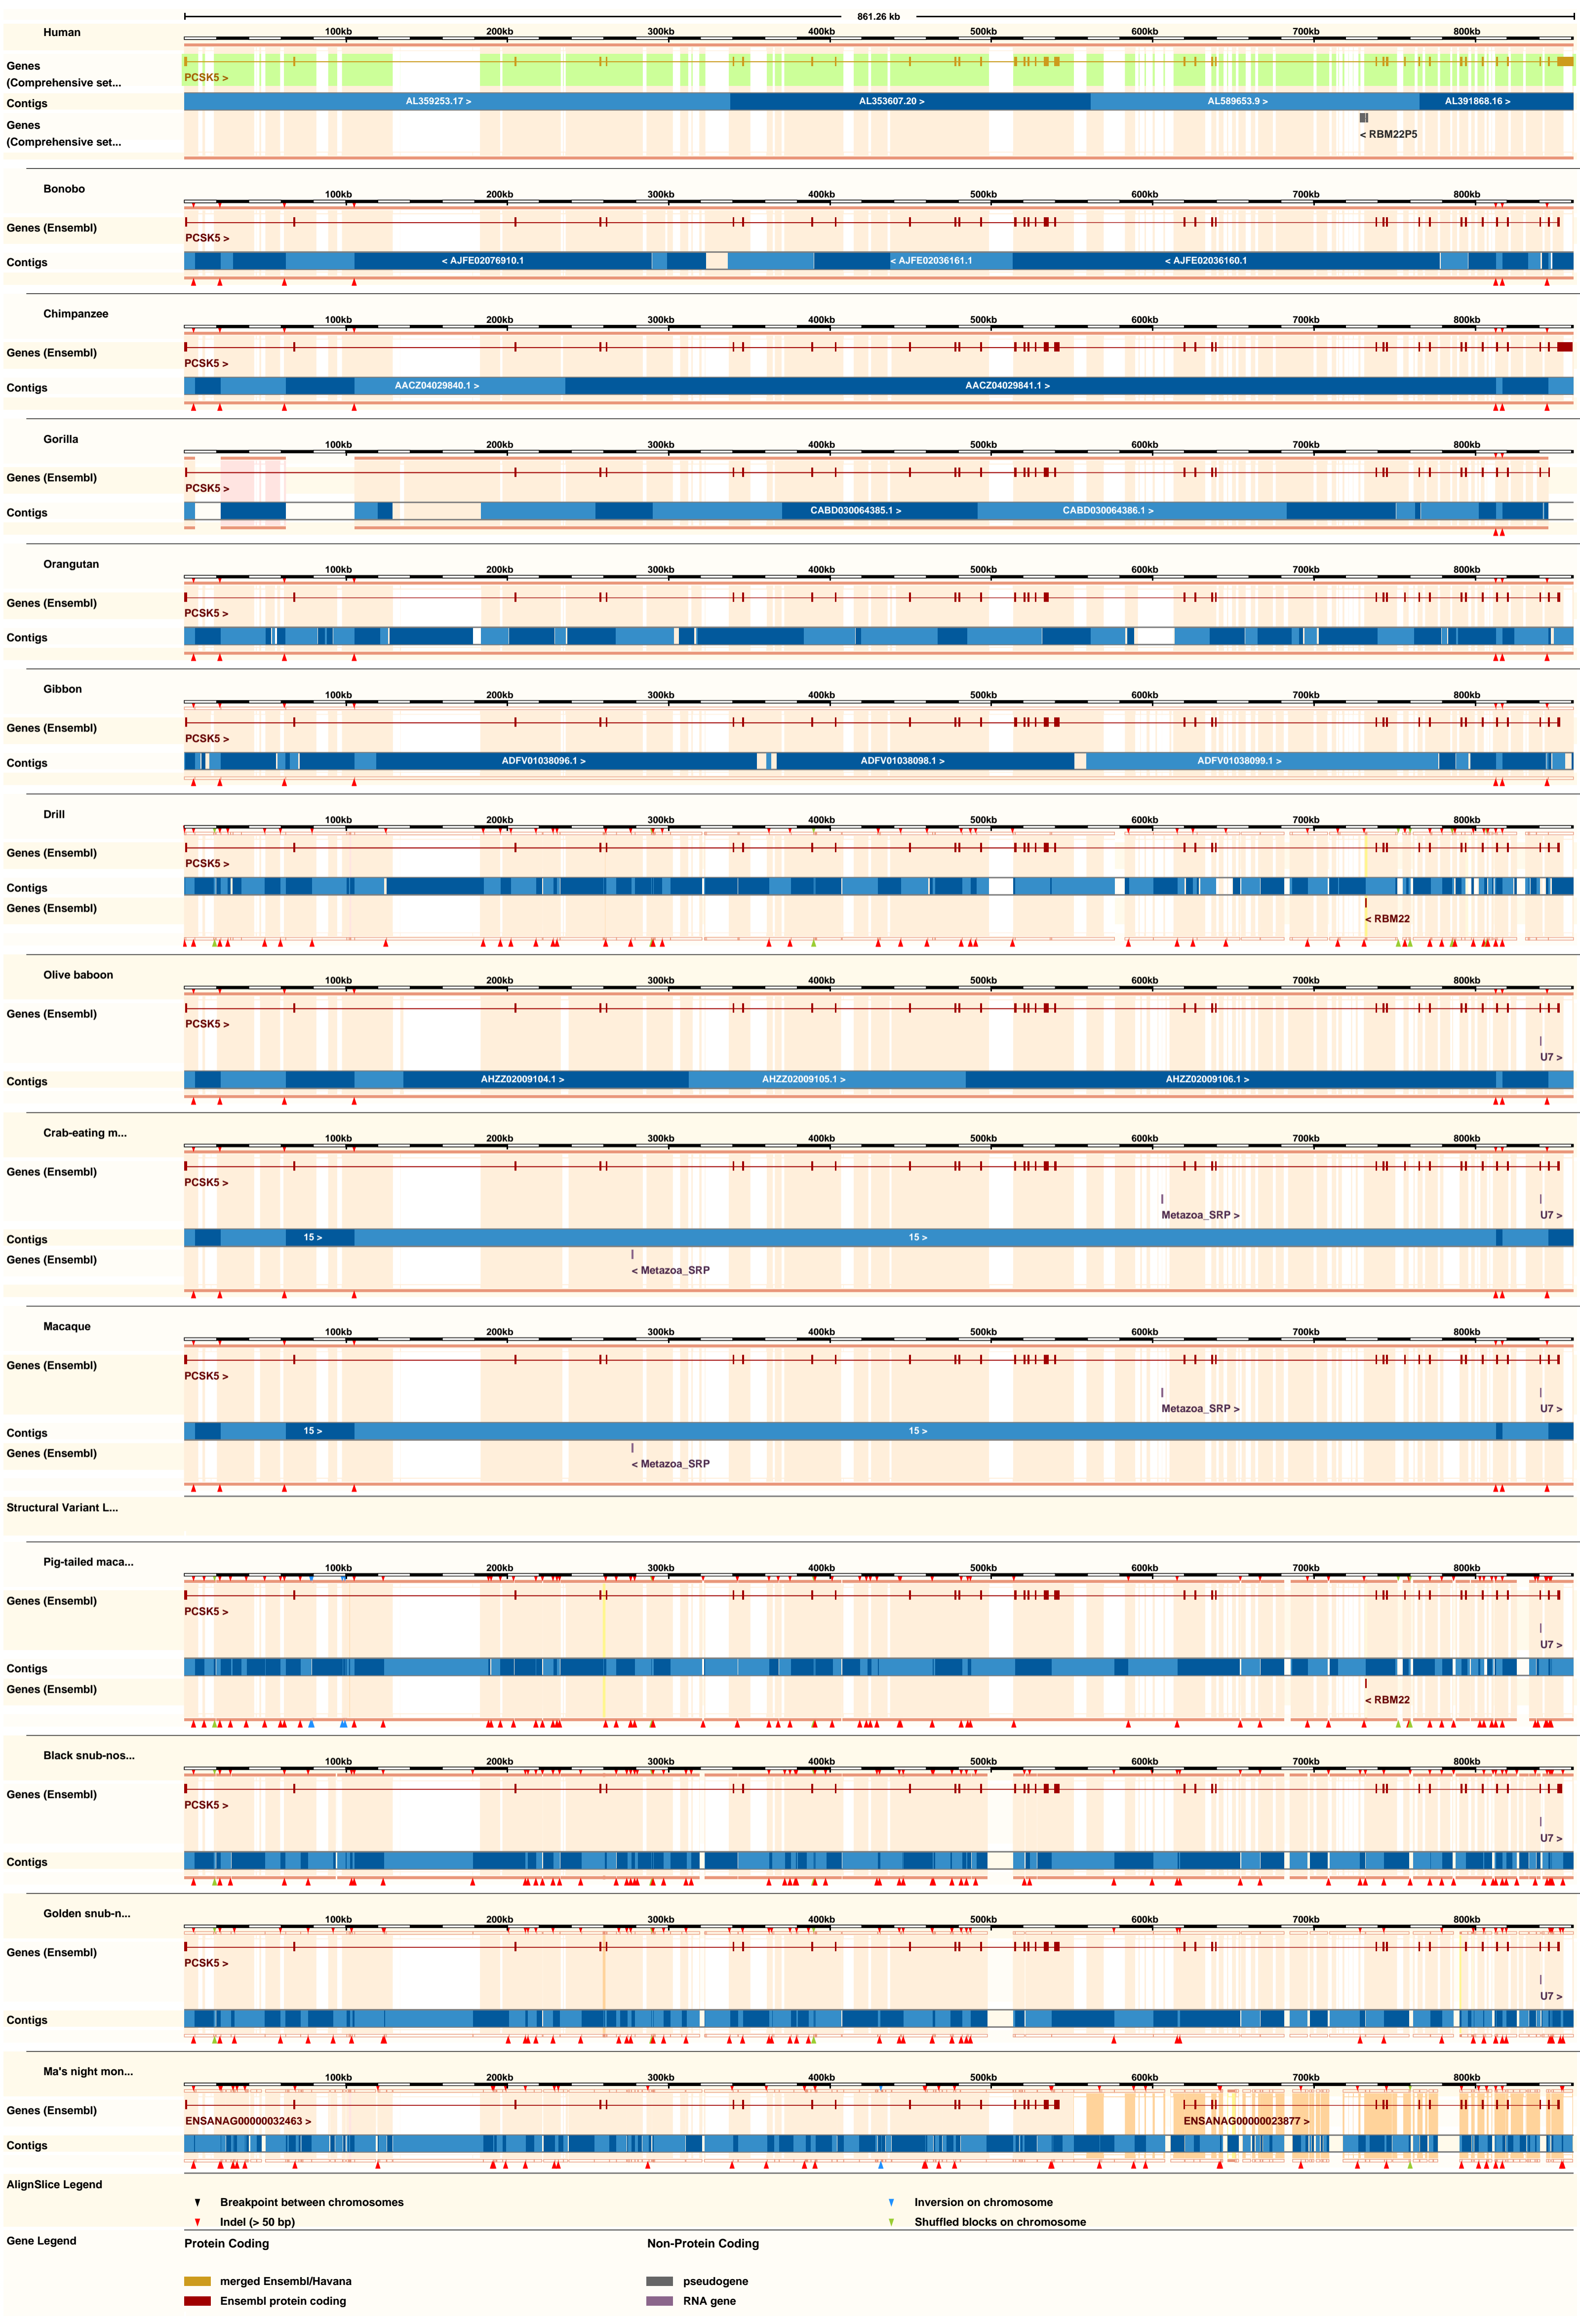

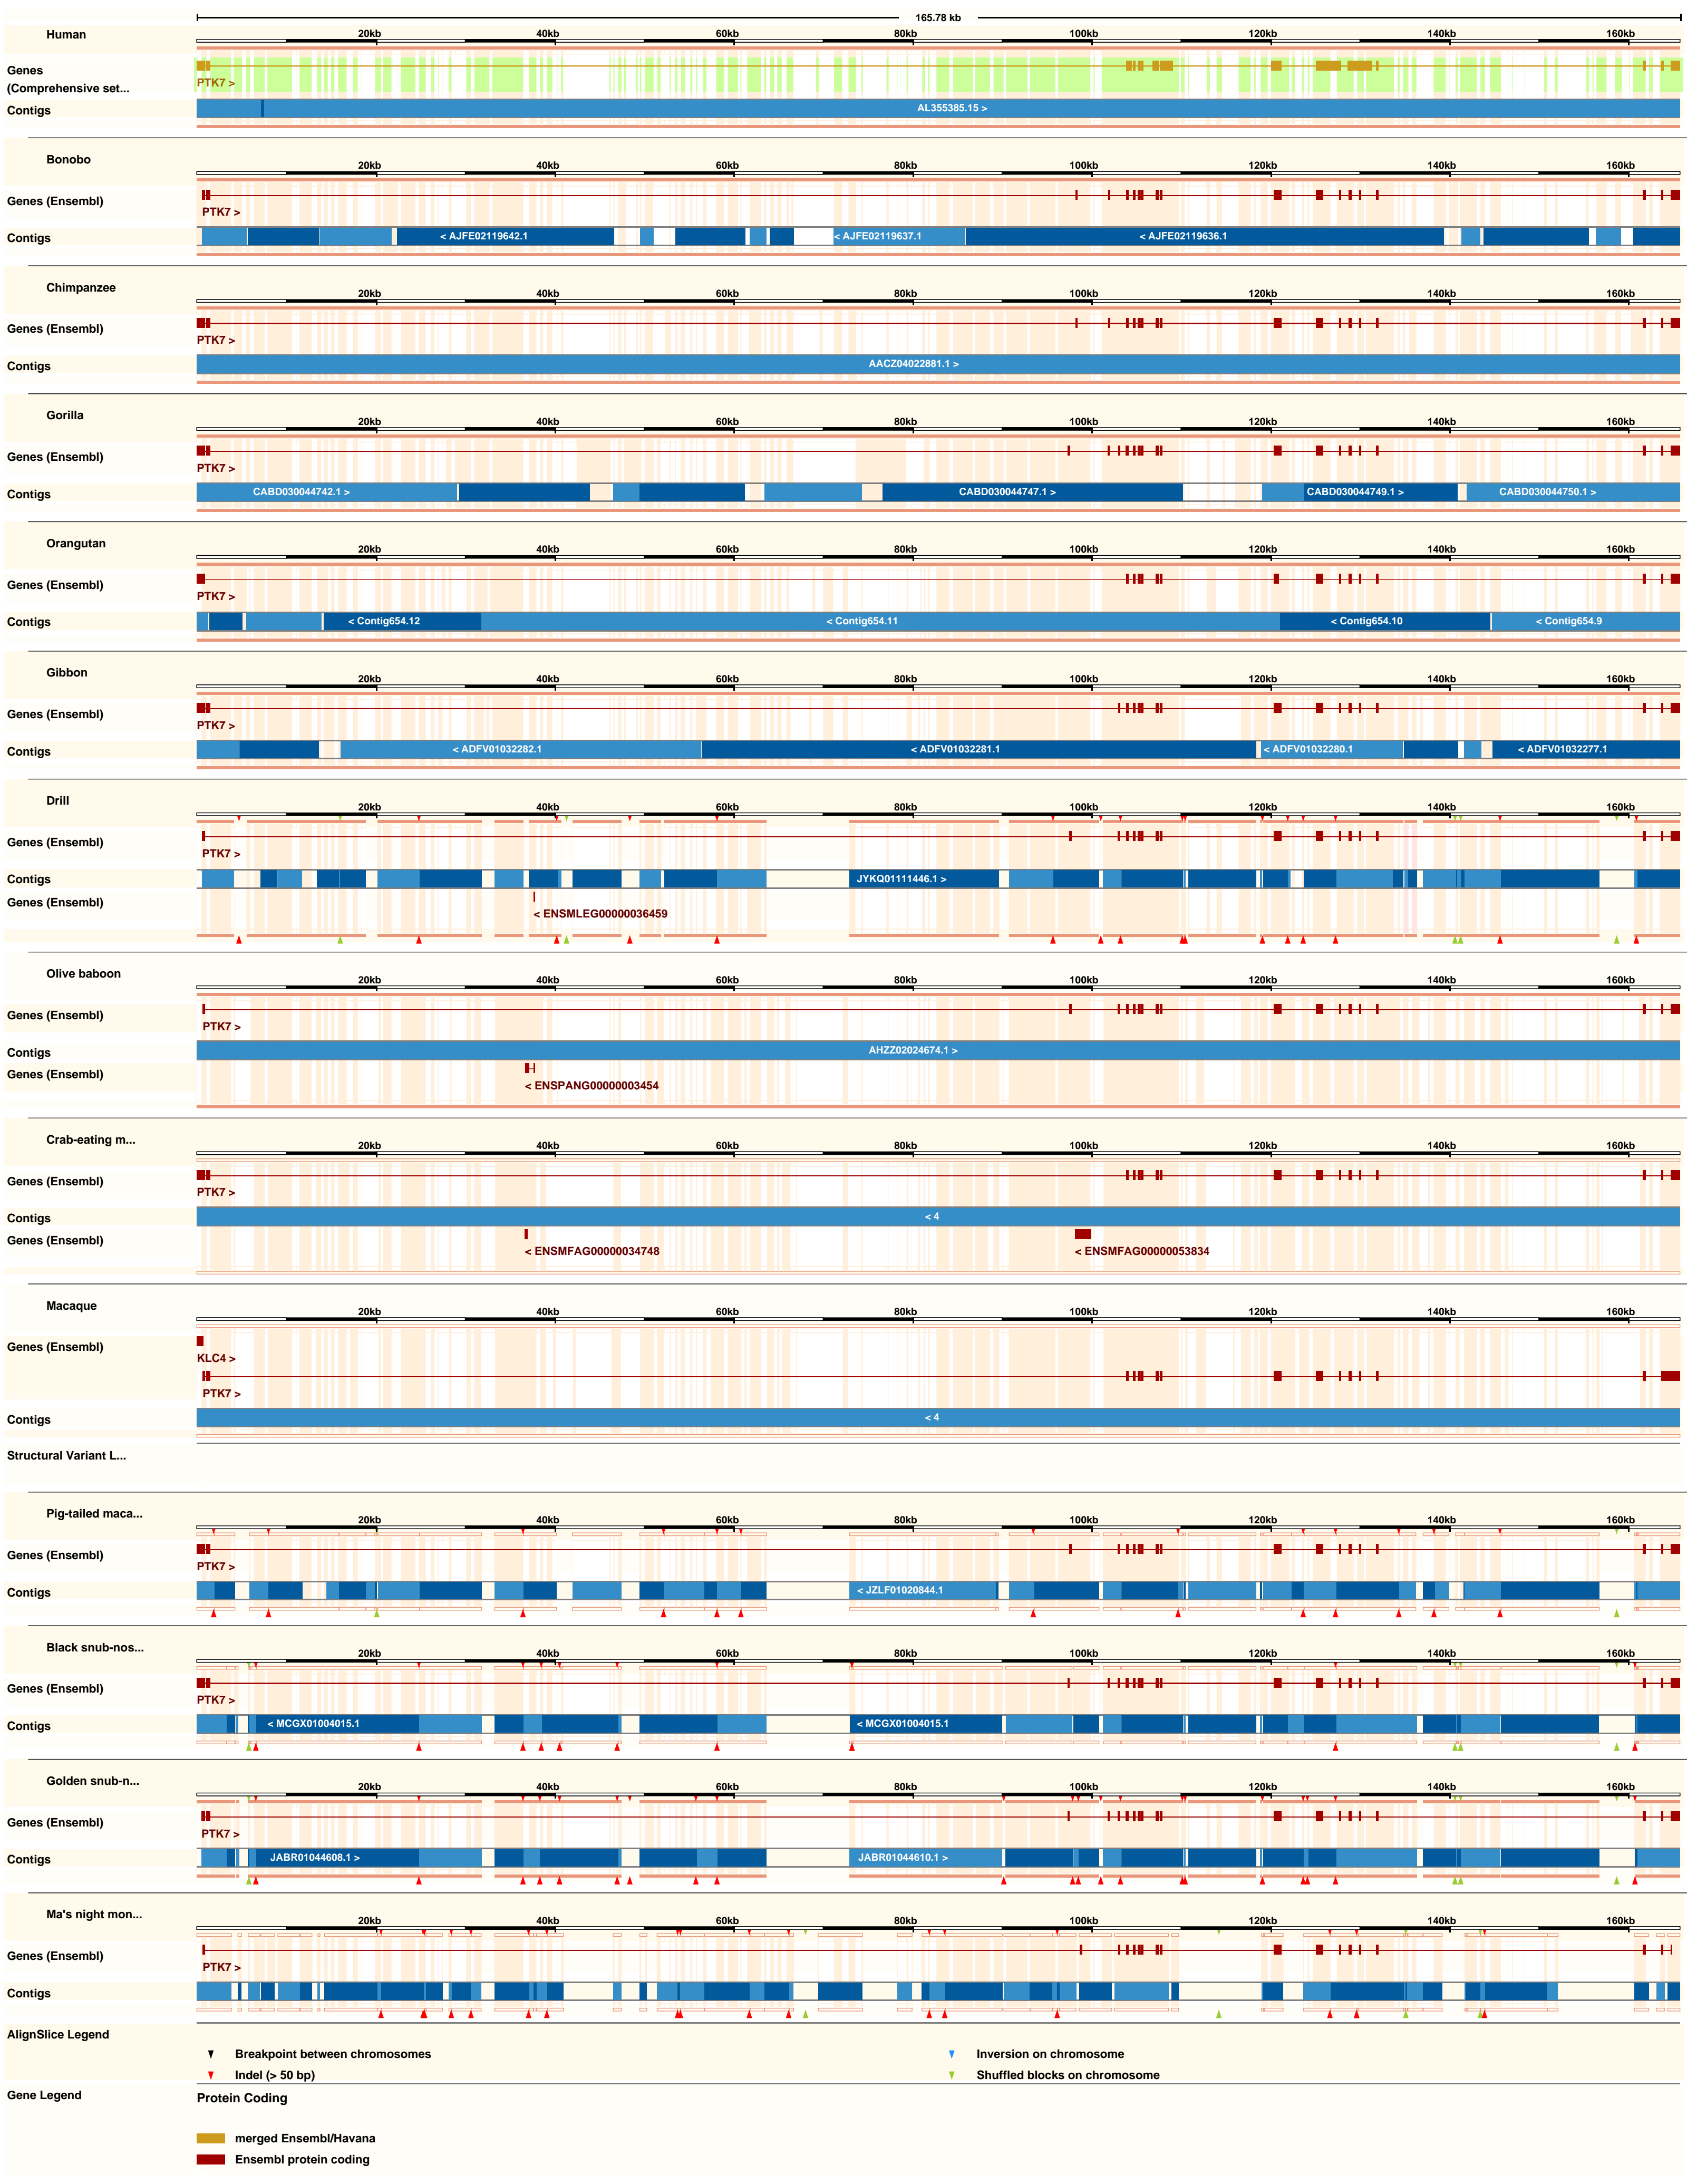



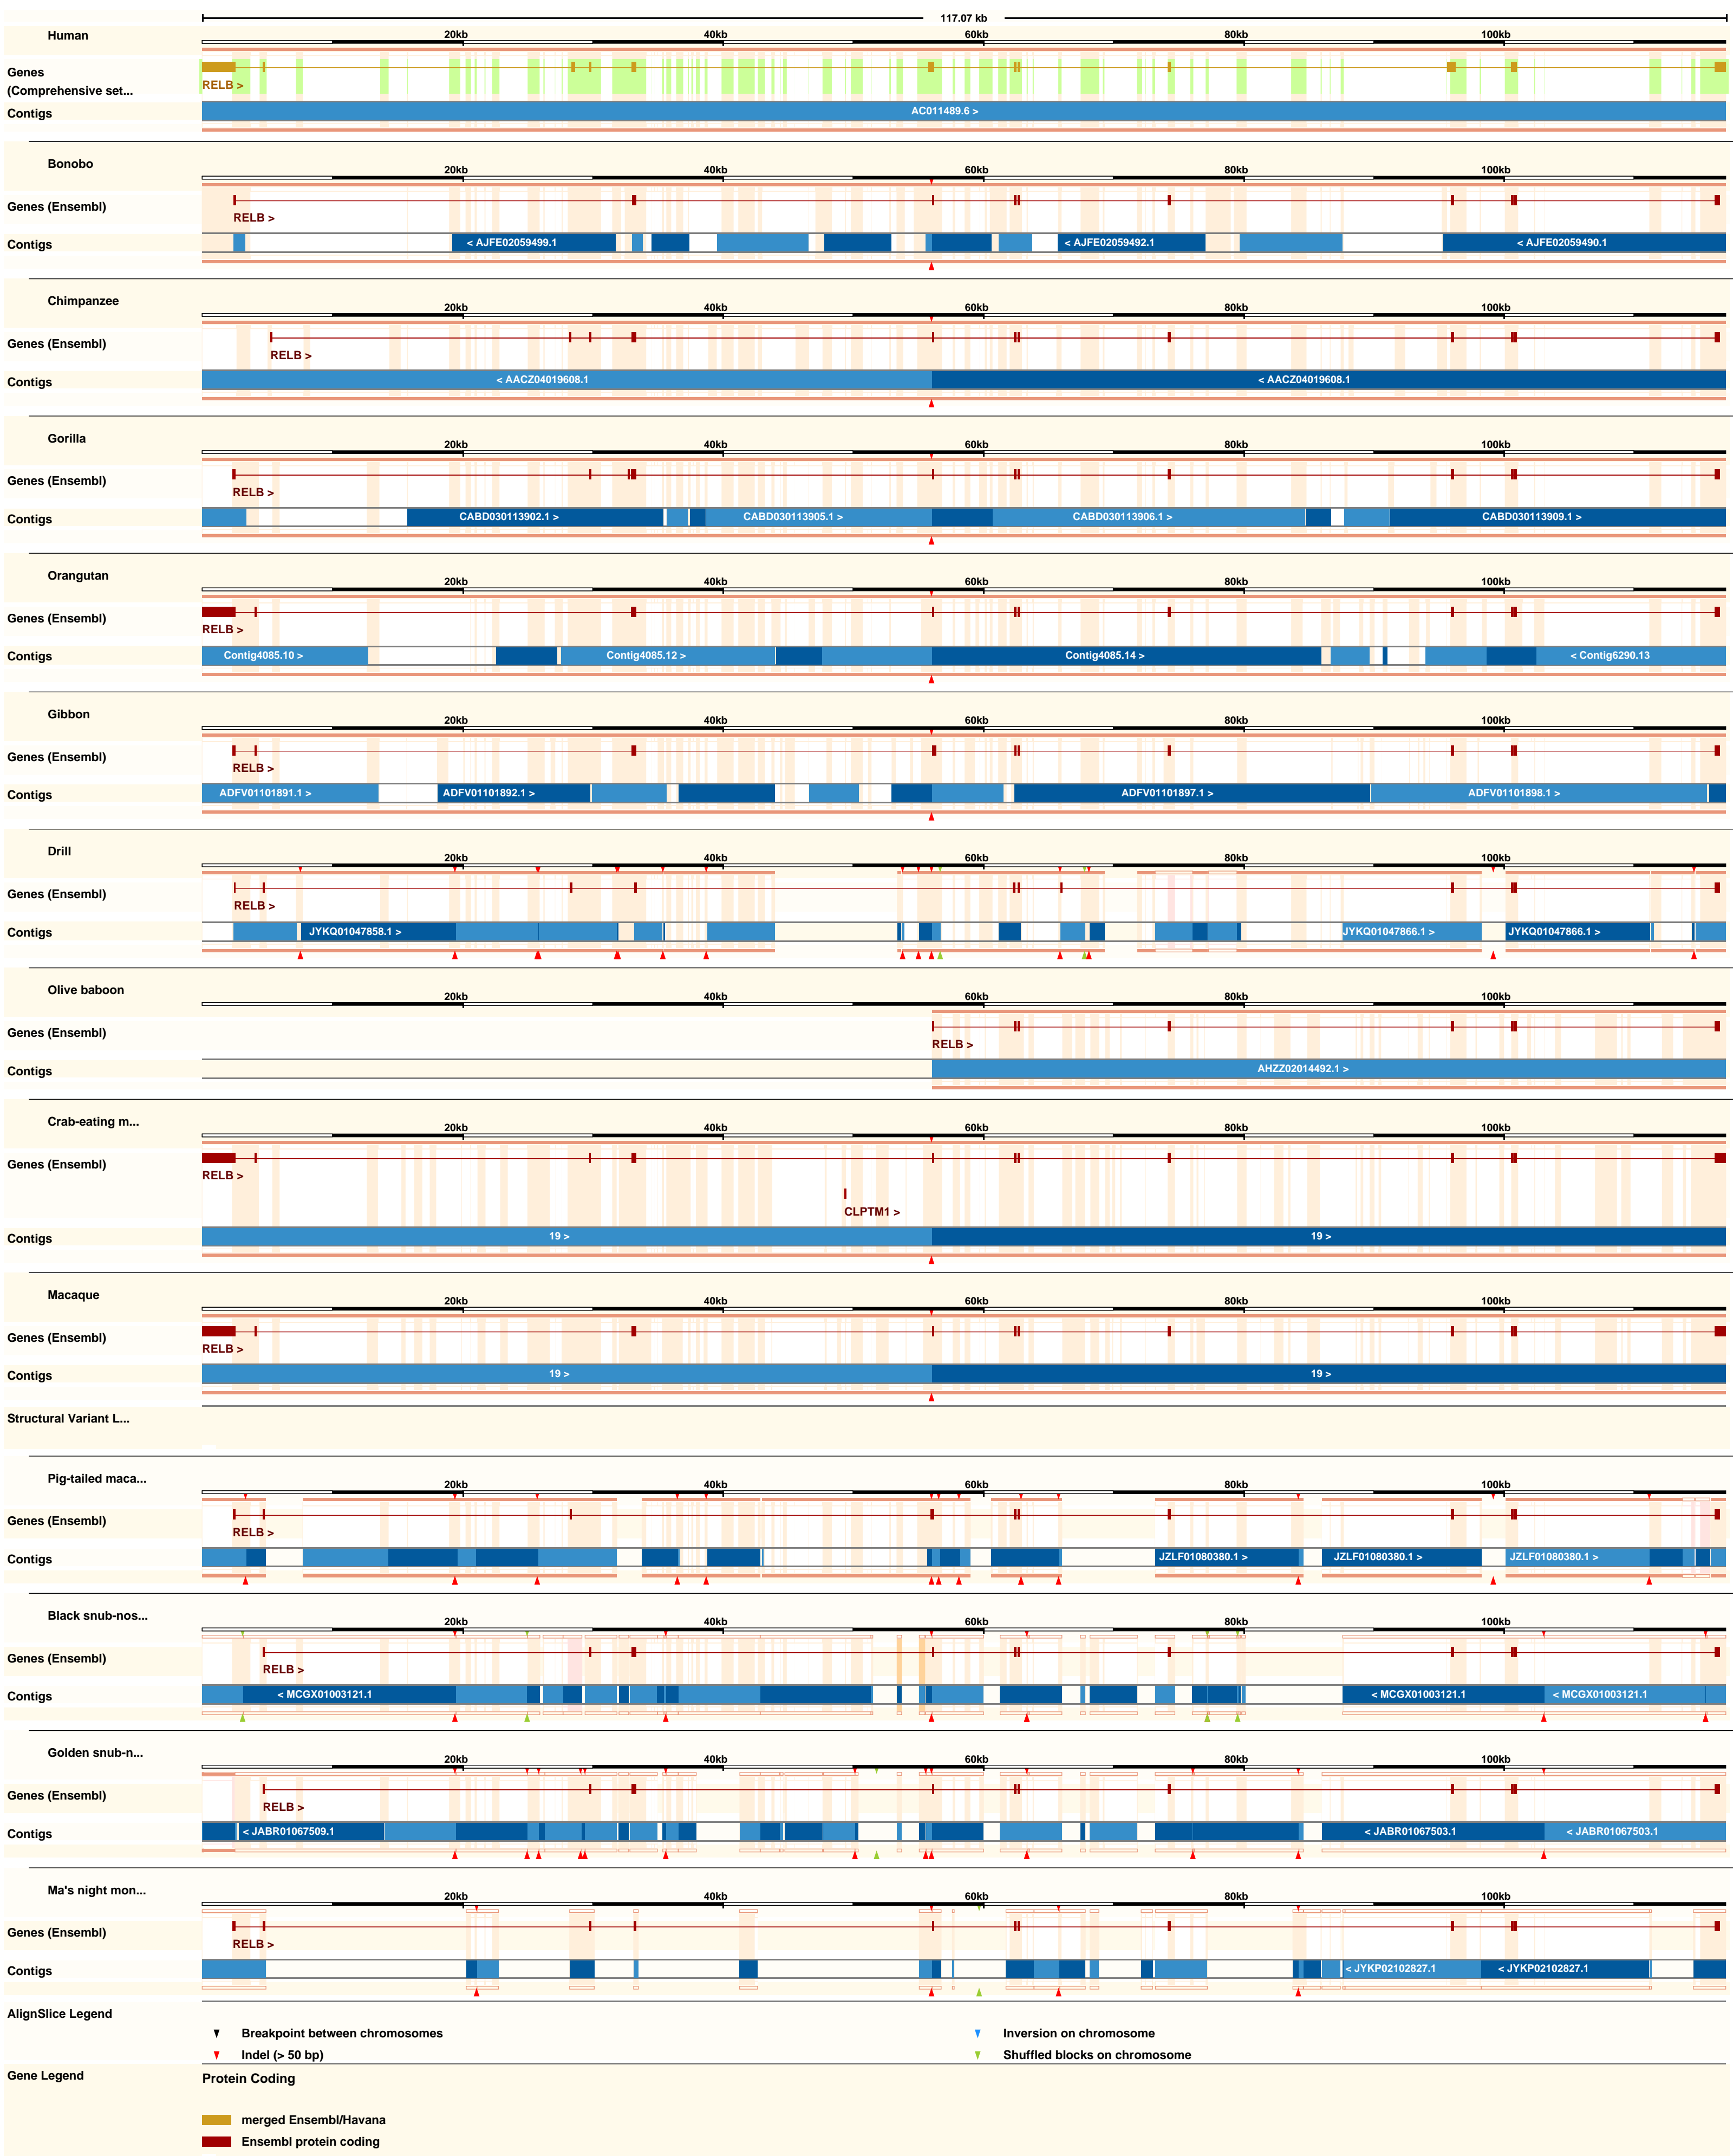

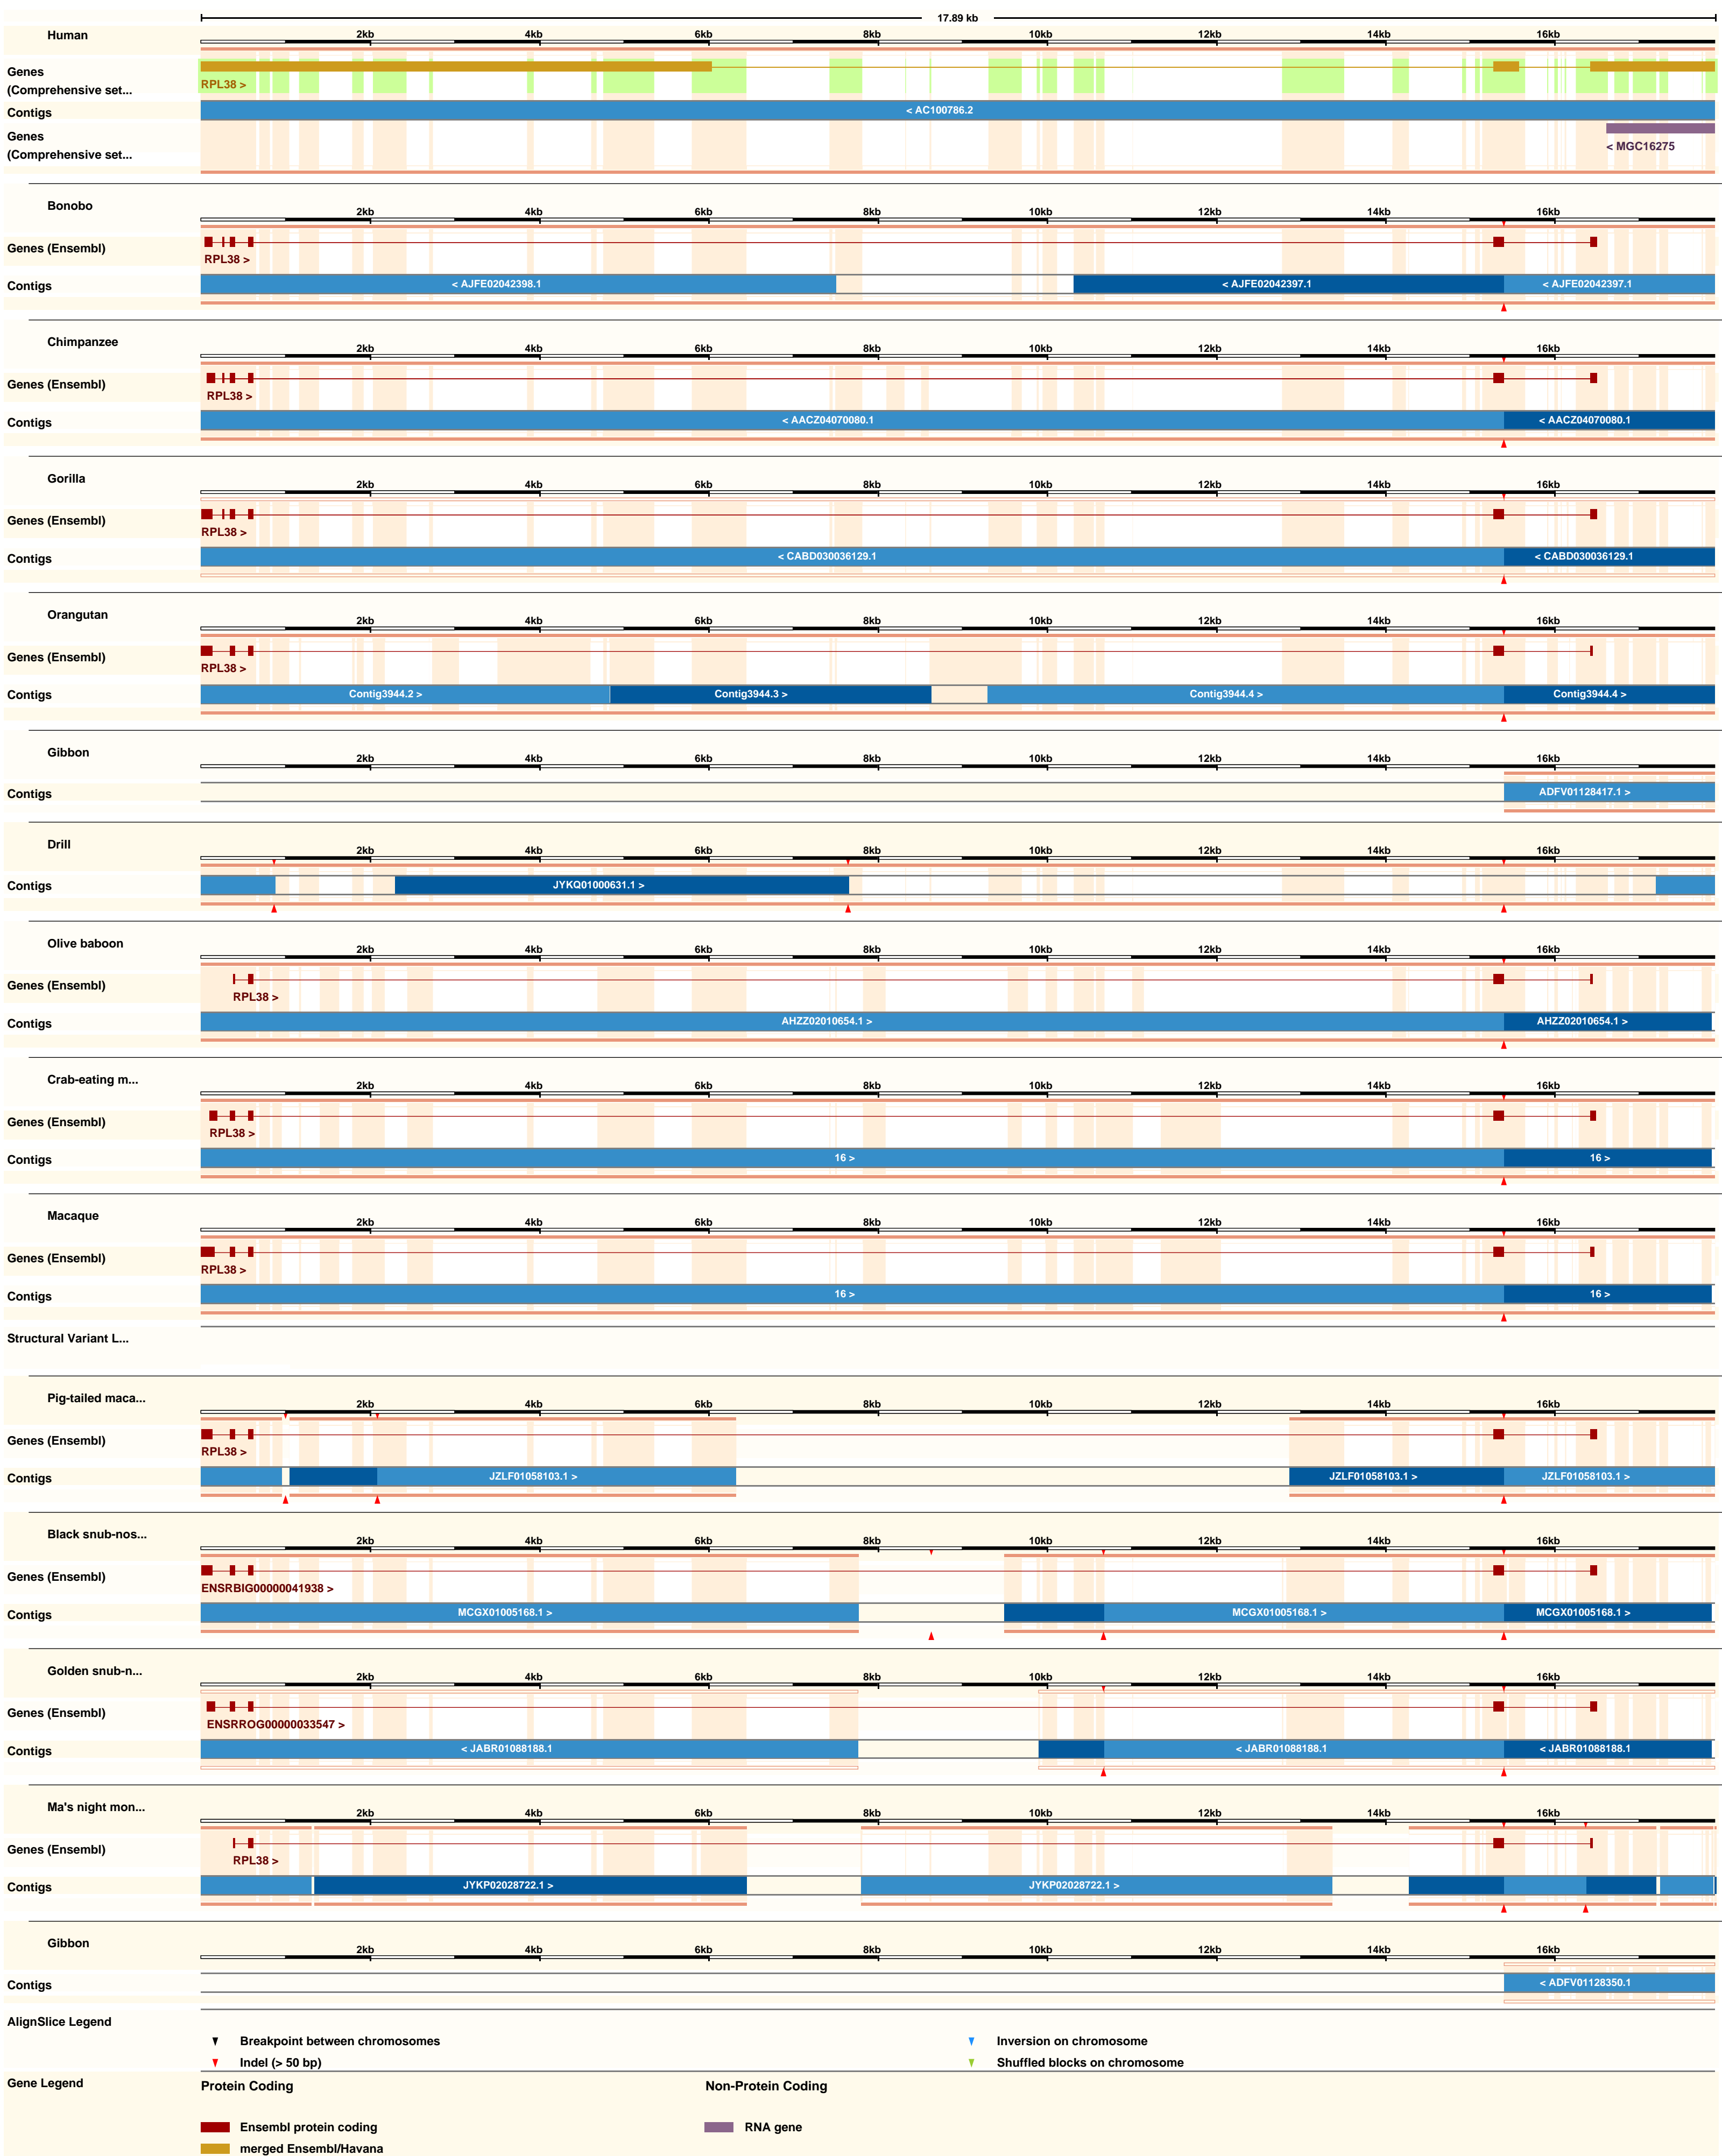

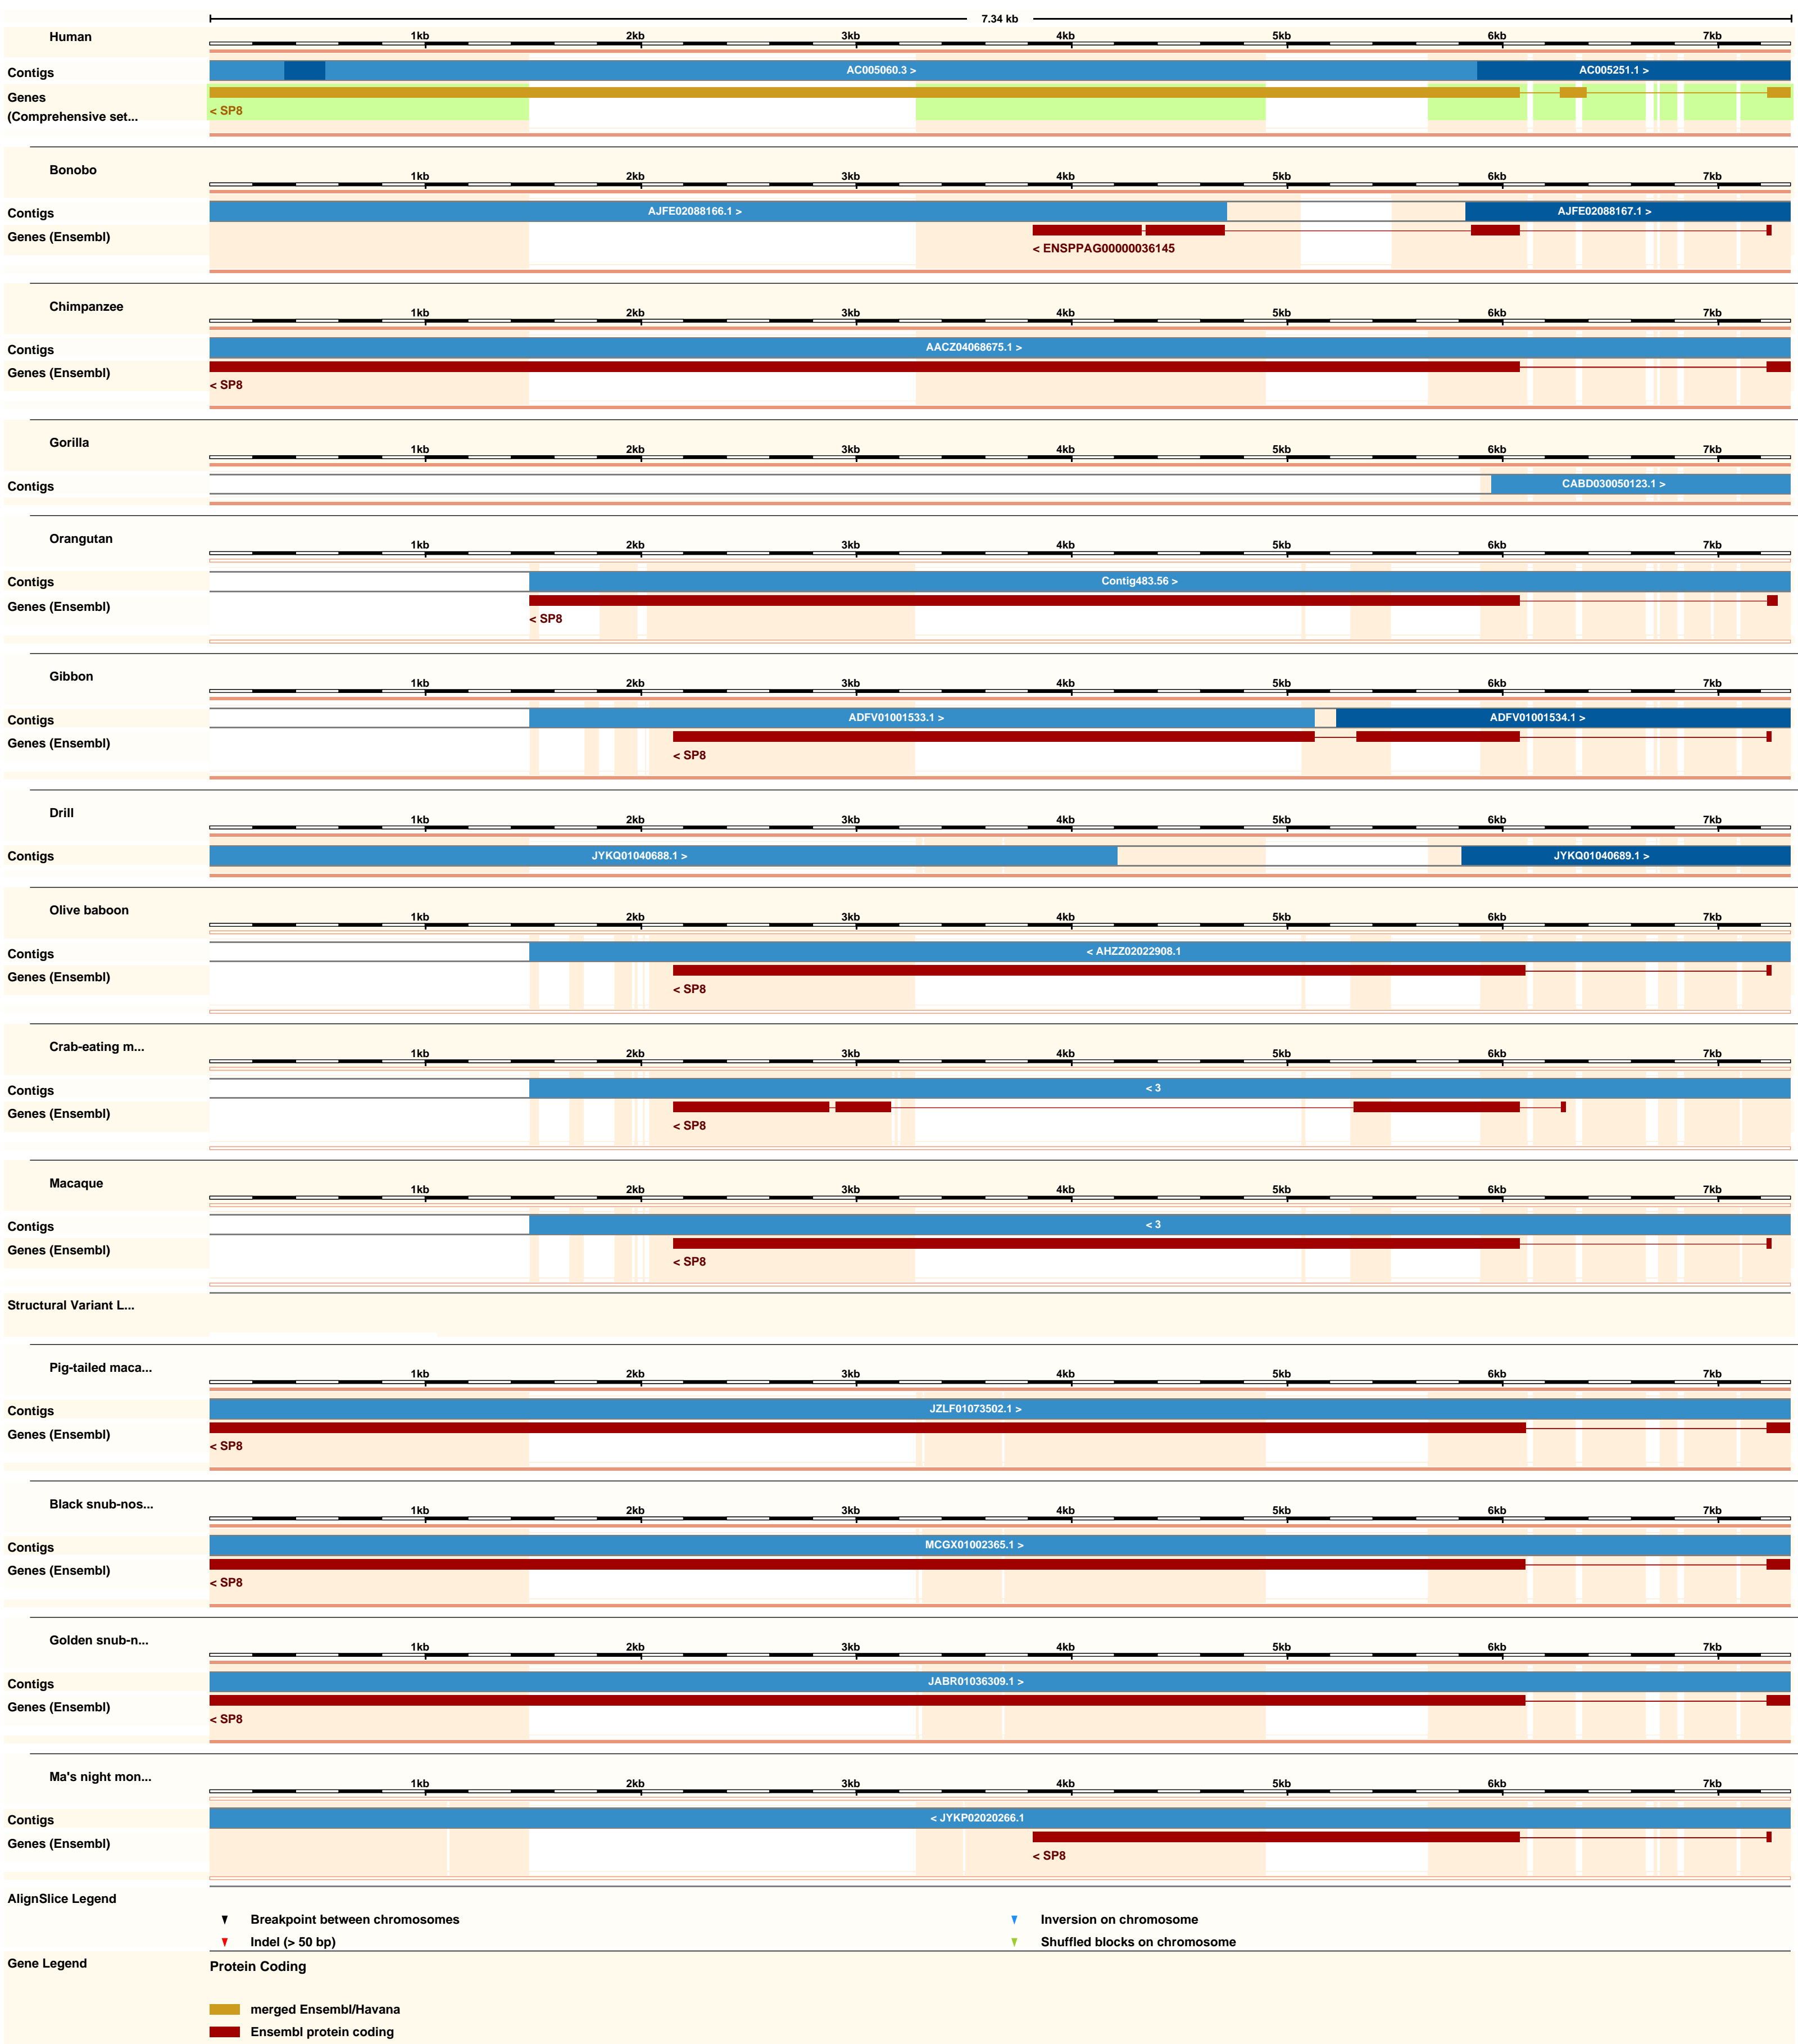

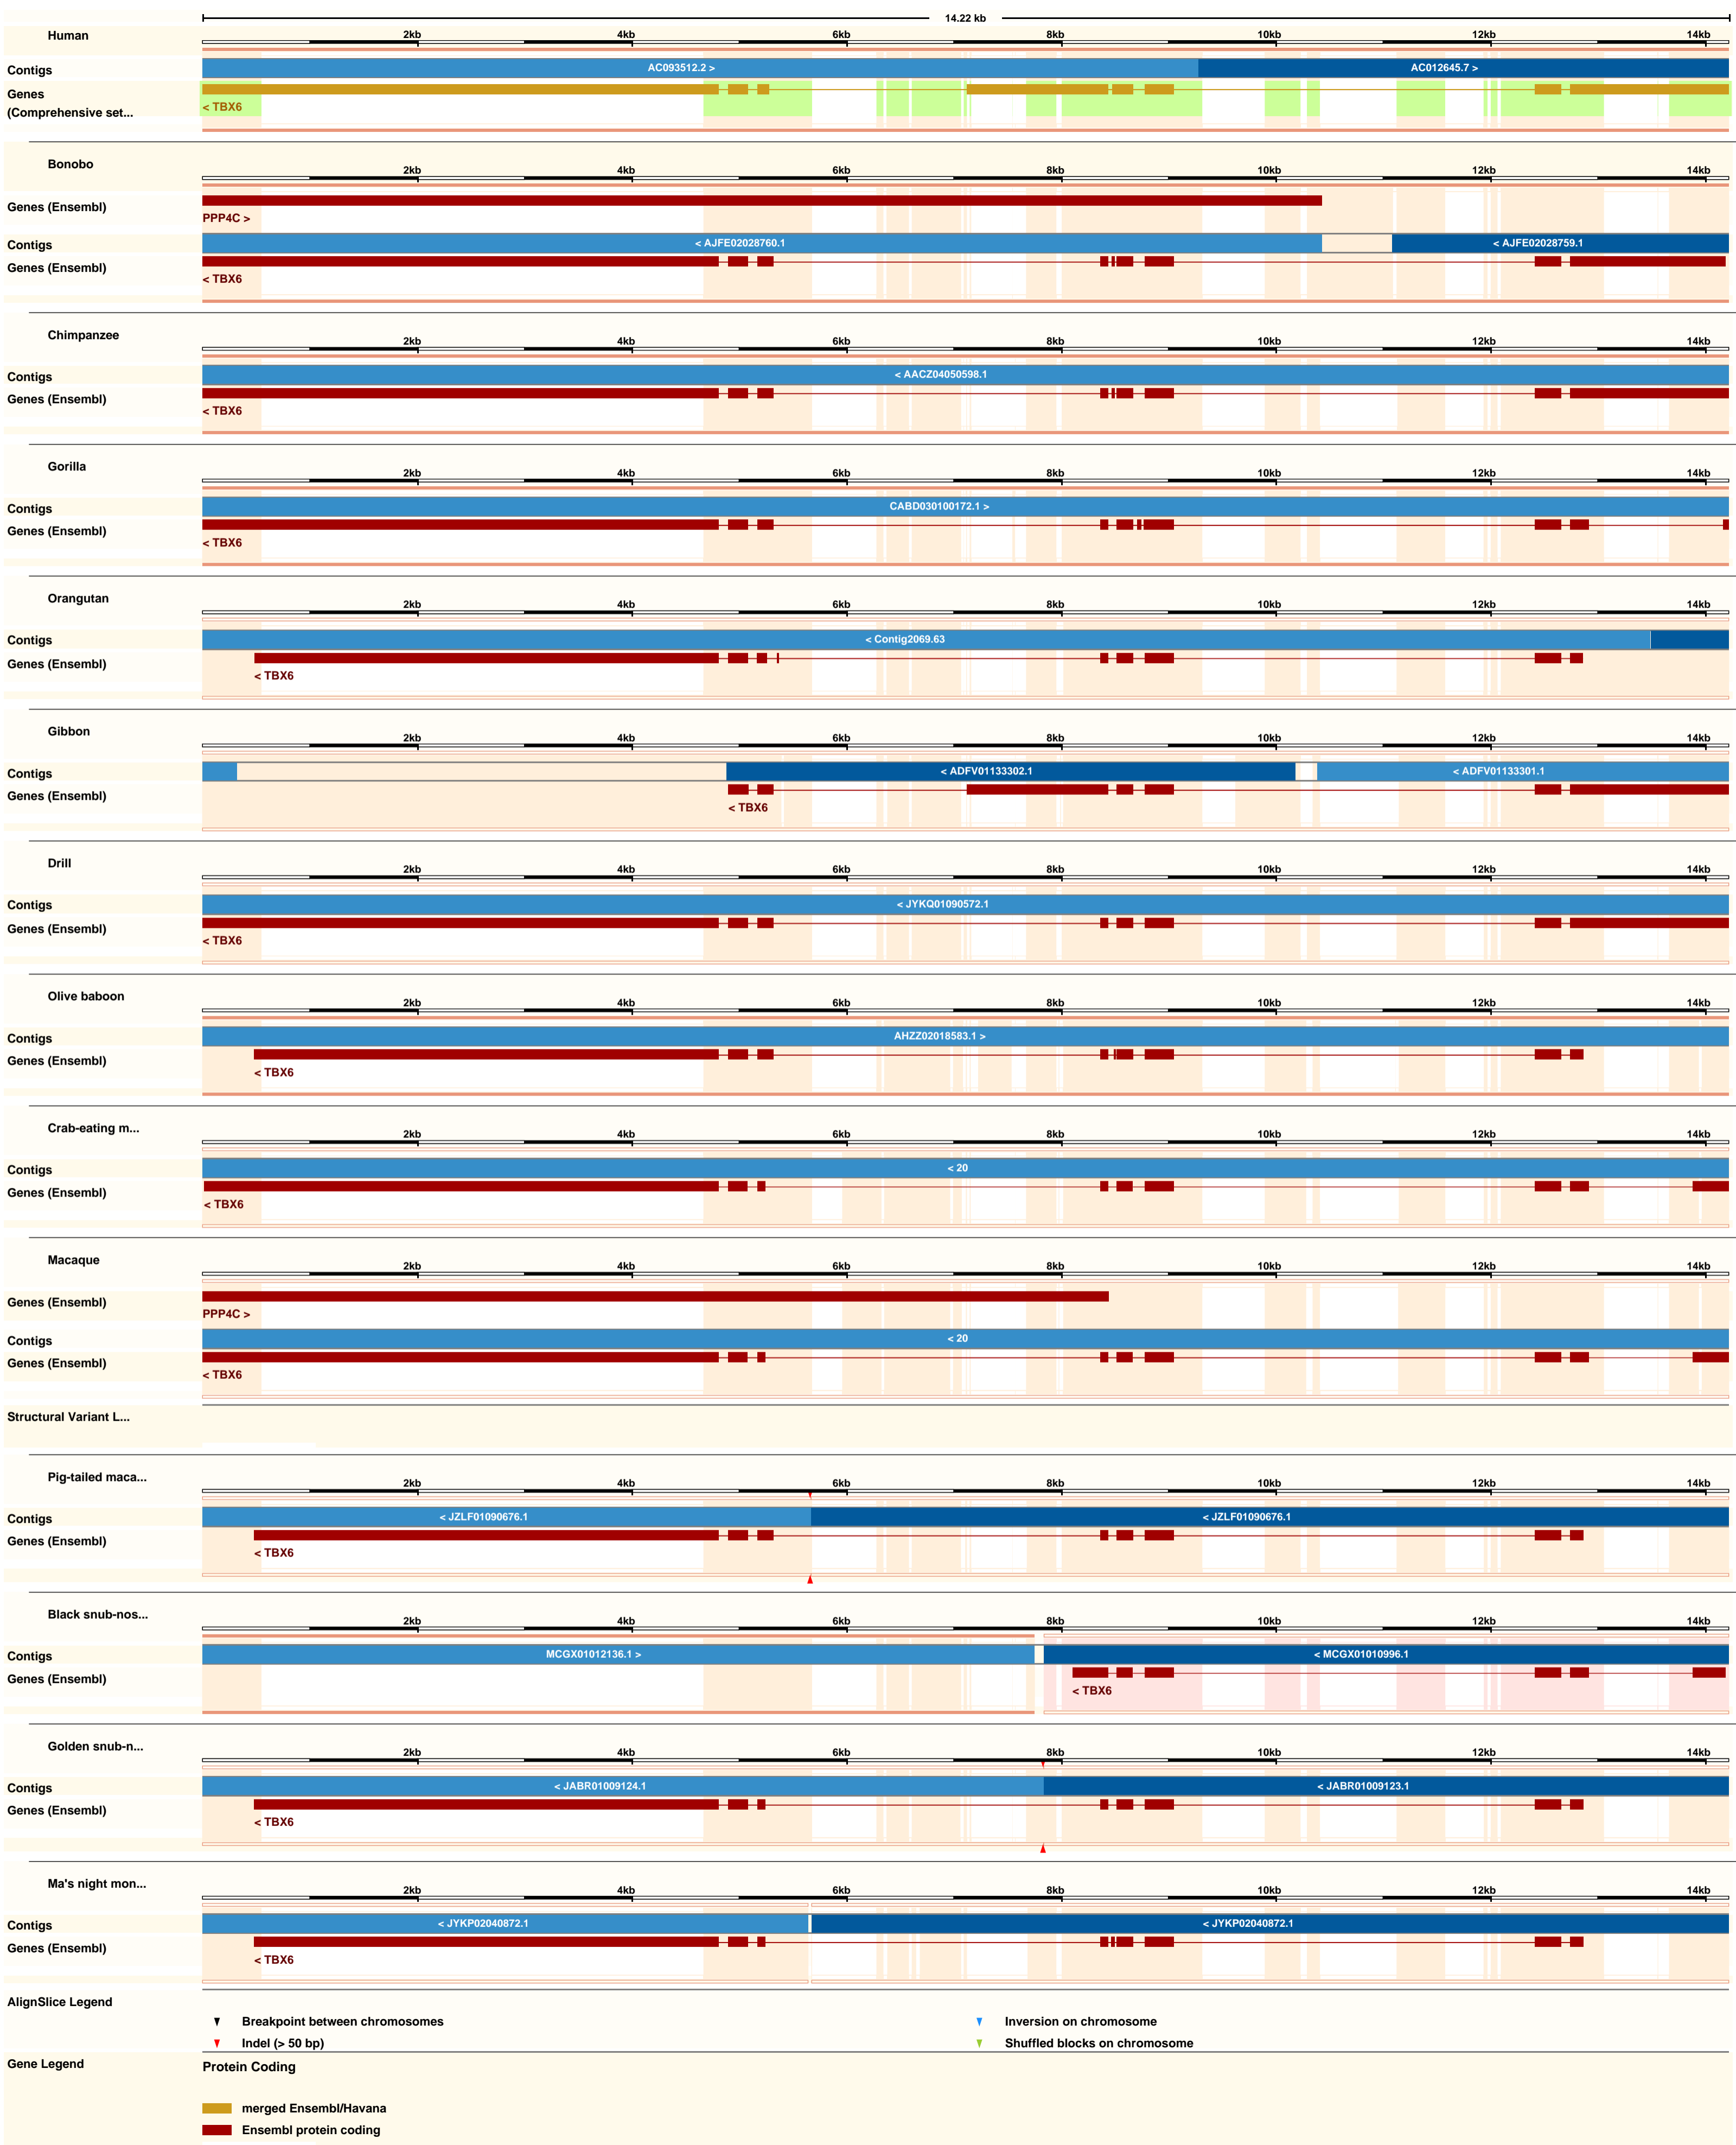

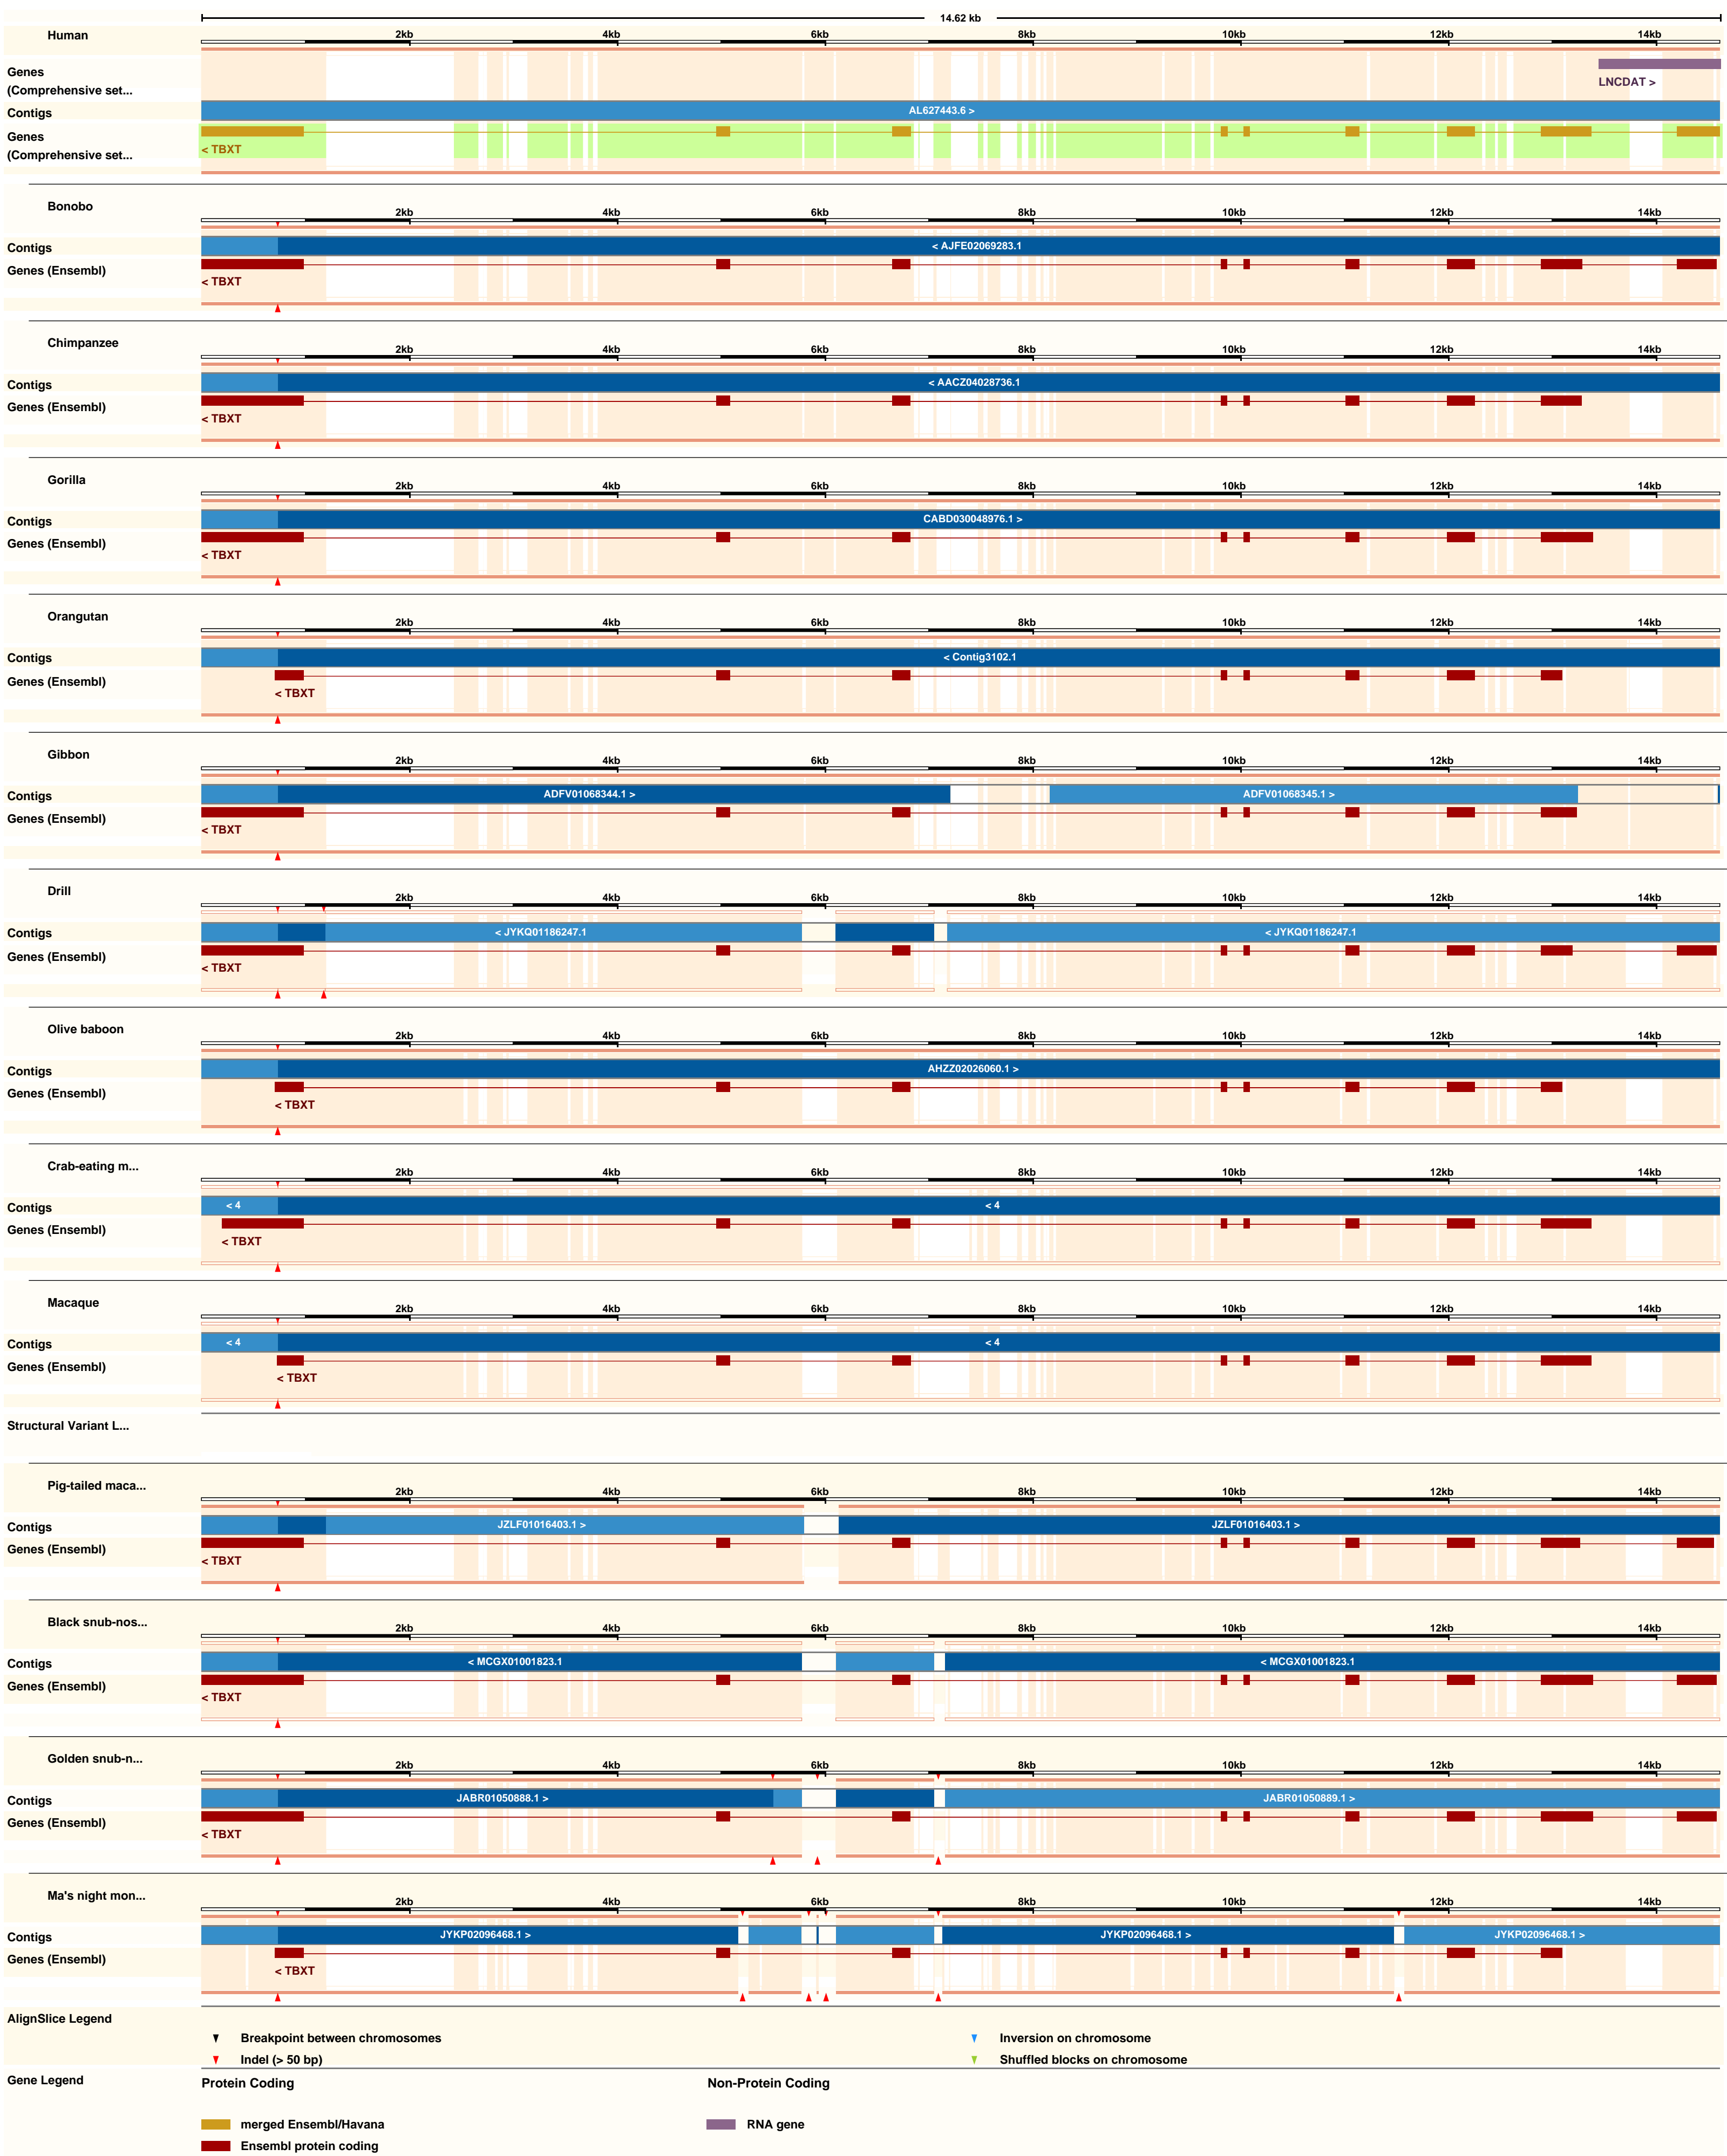

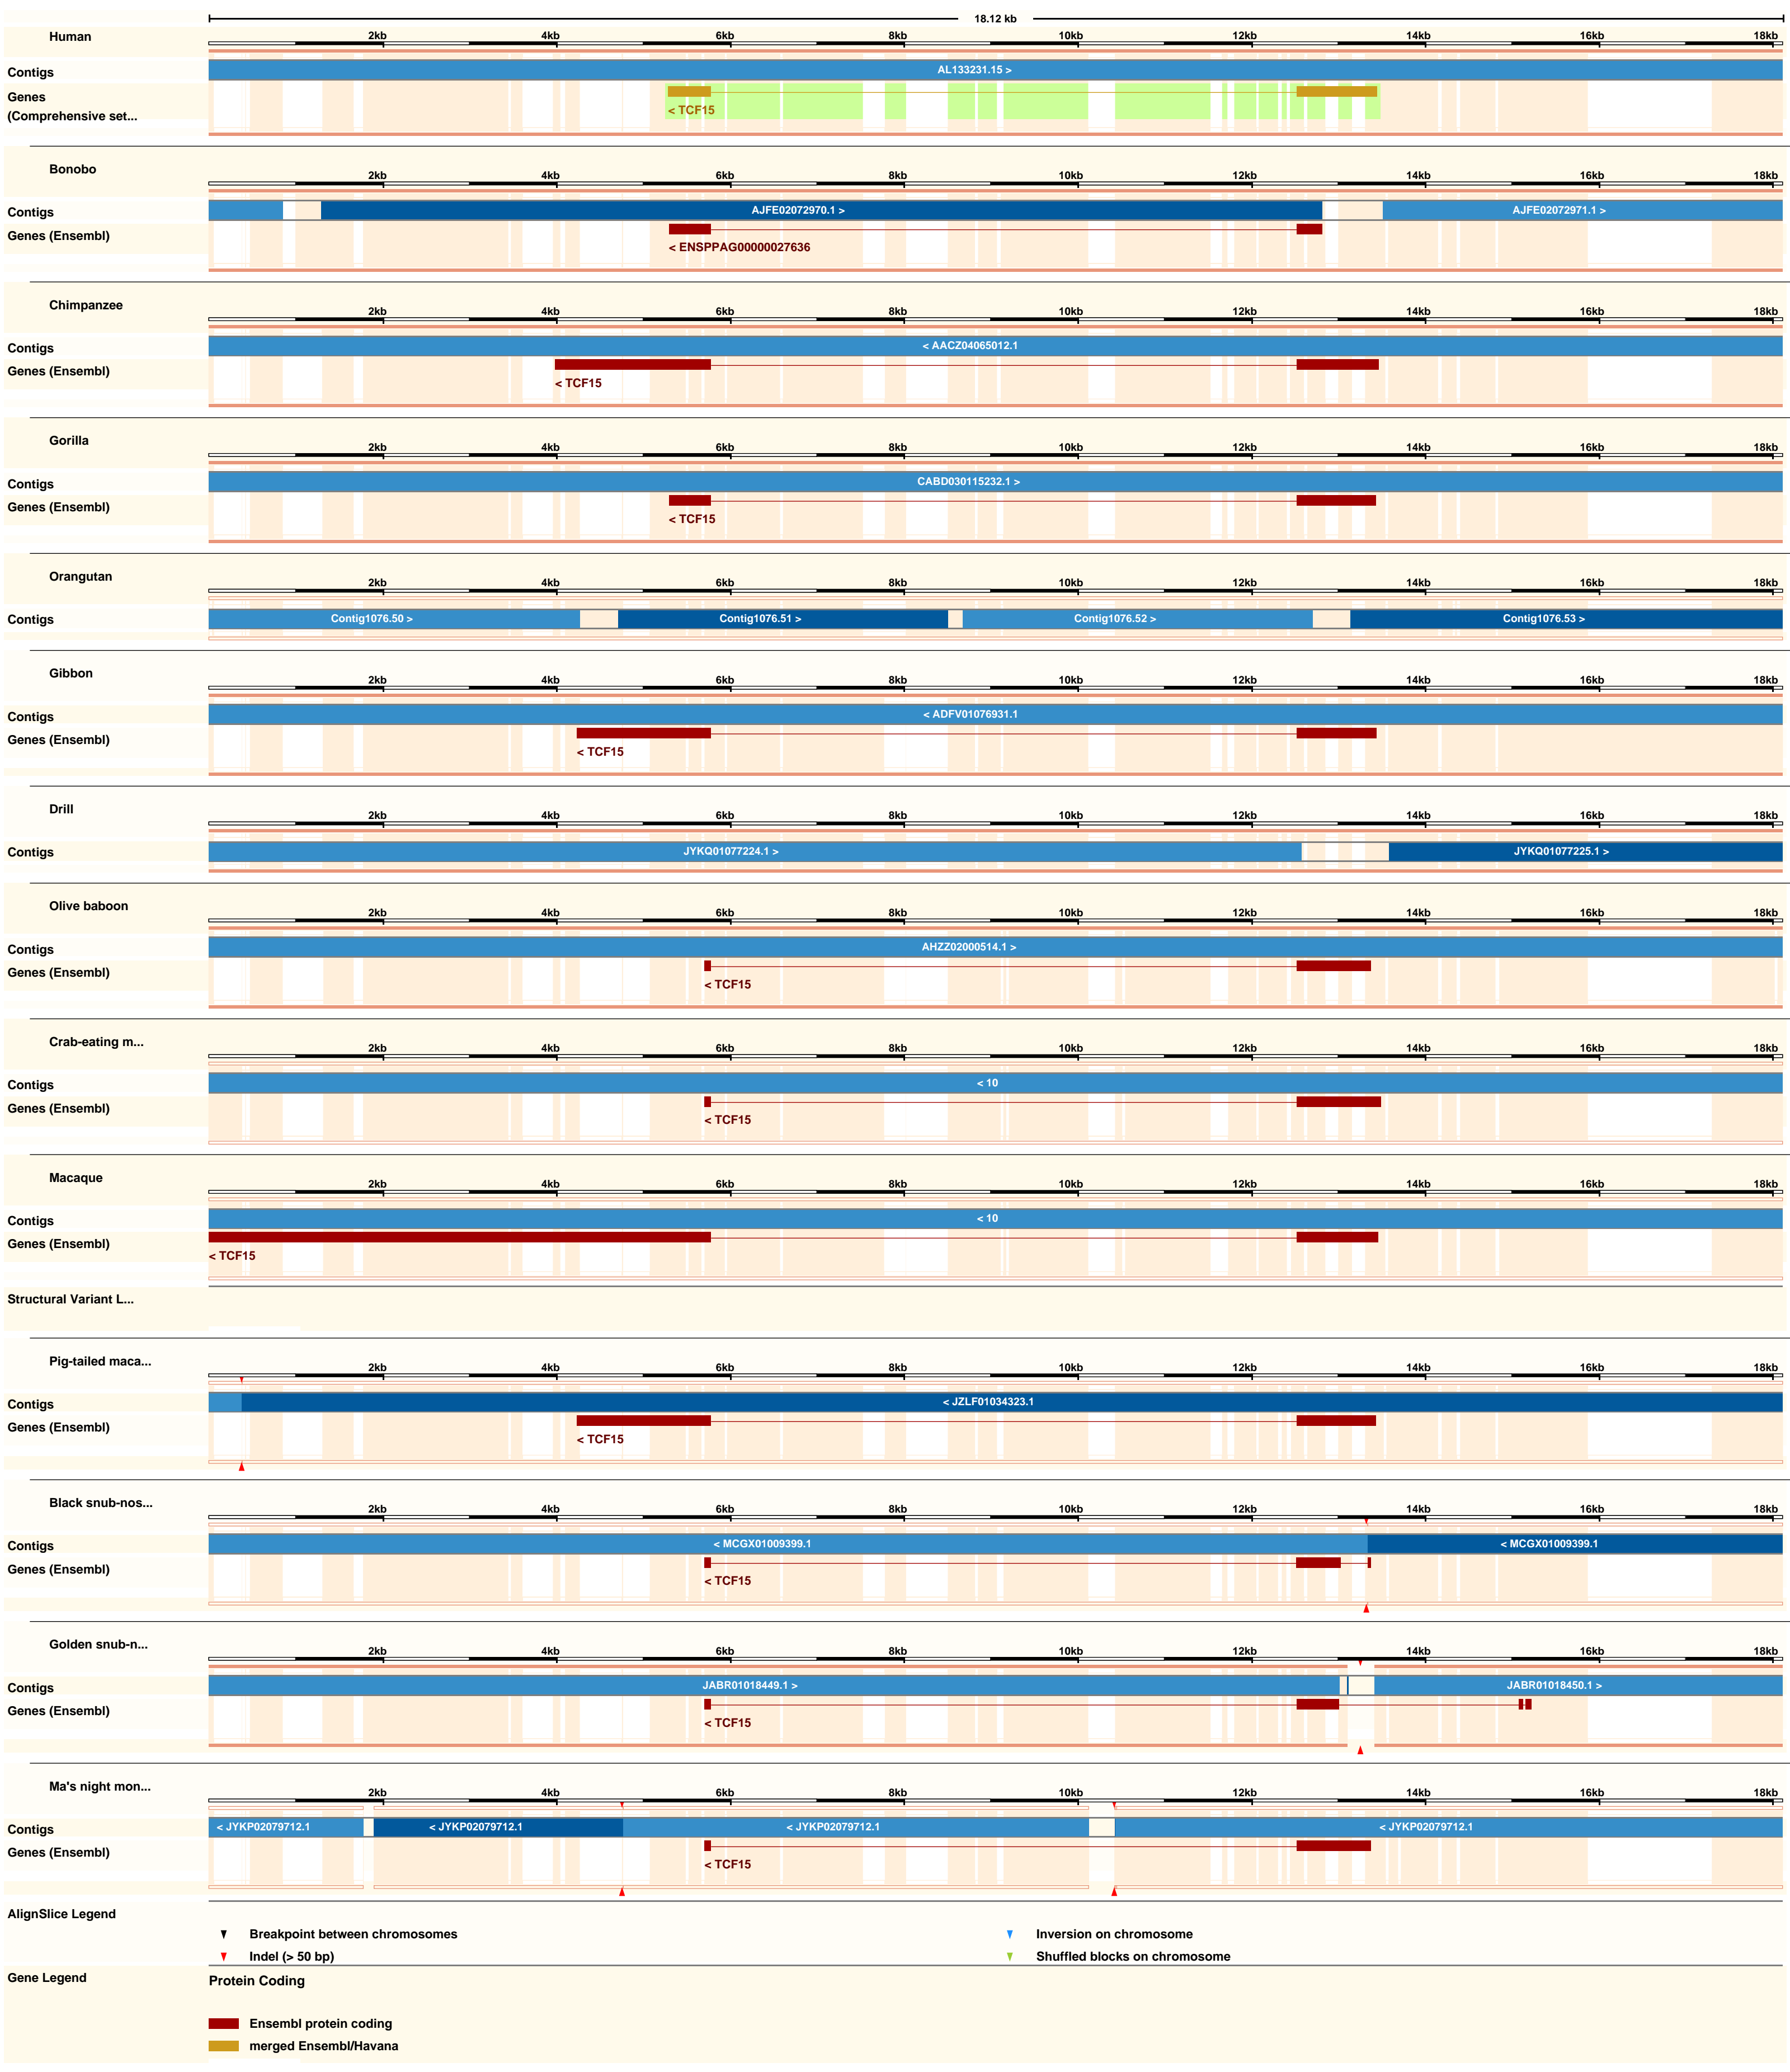

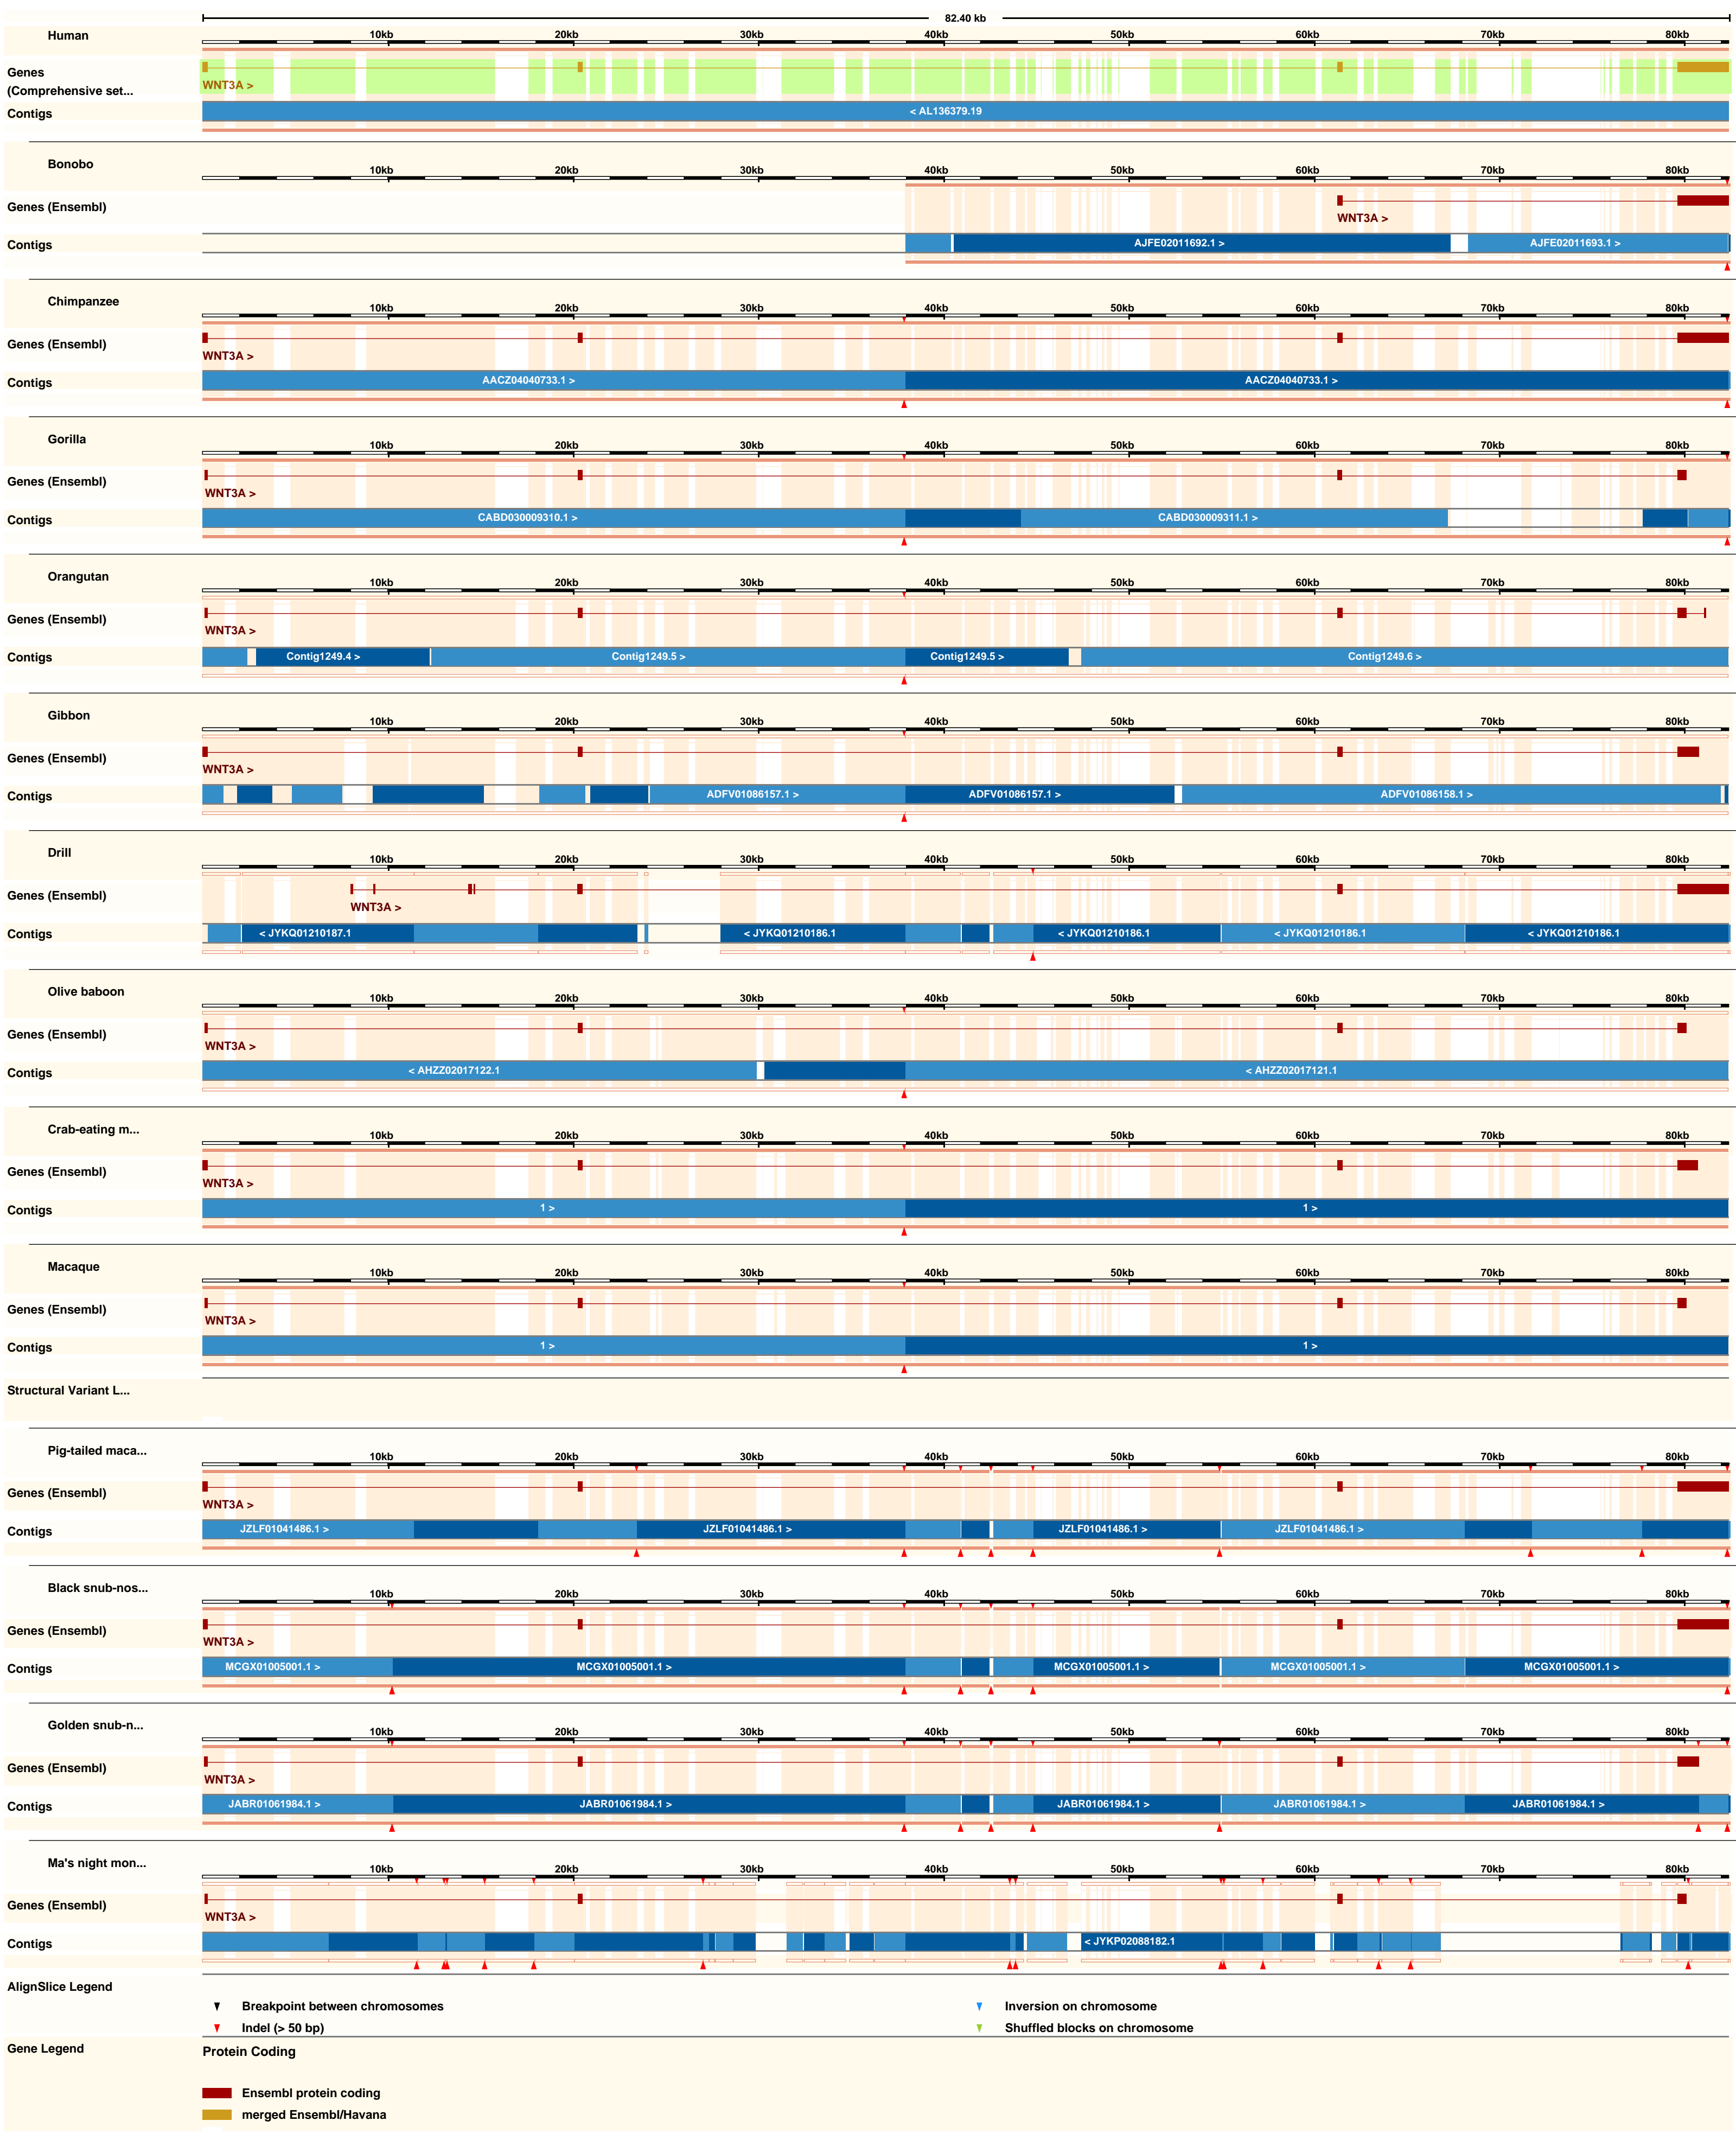

Supplement: Supplementary file [file media-1.pdf]
